# Supplementary material
Source: PubMed Central journal article supplement (PMC9978435)
Supplement: jcsm.10336.sm001.pdf [file jcsm.10336.sm001.pdf]

**Figure S1**—Effect direction plot for the association between education and sleep outcomes.

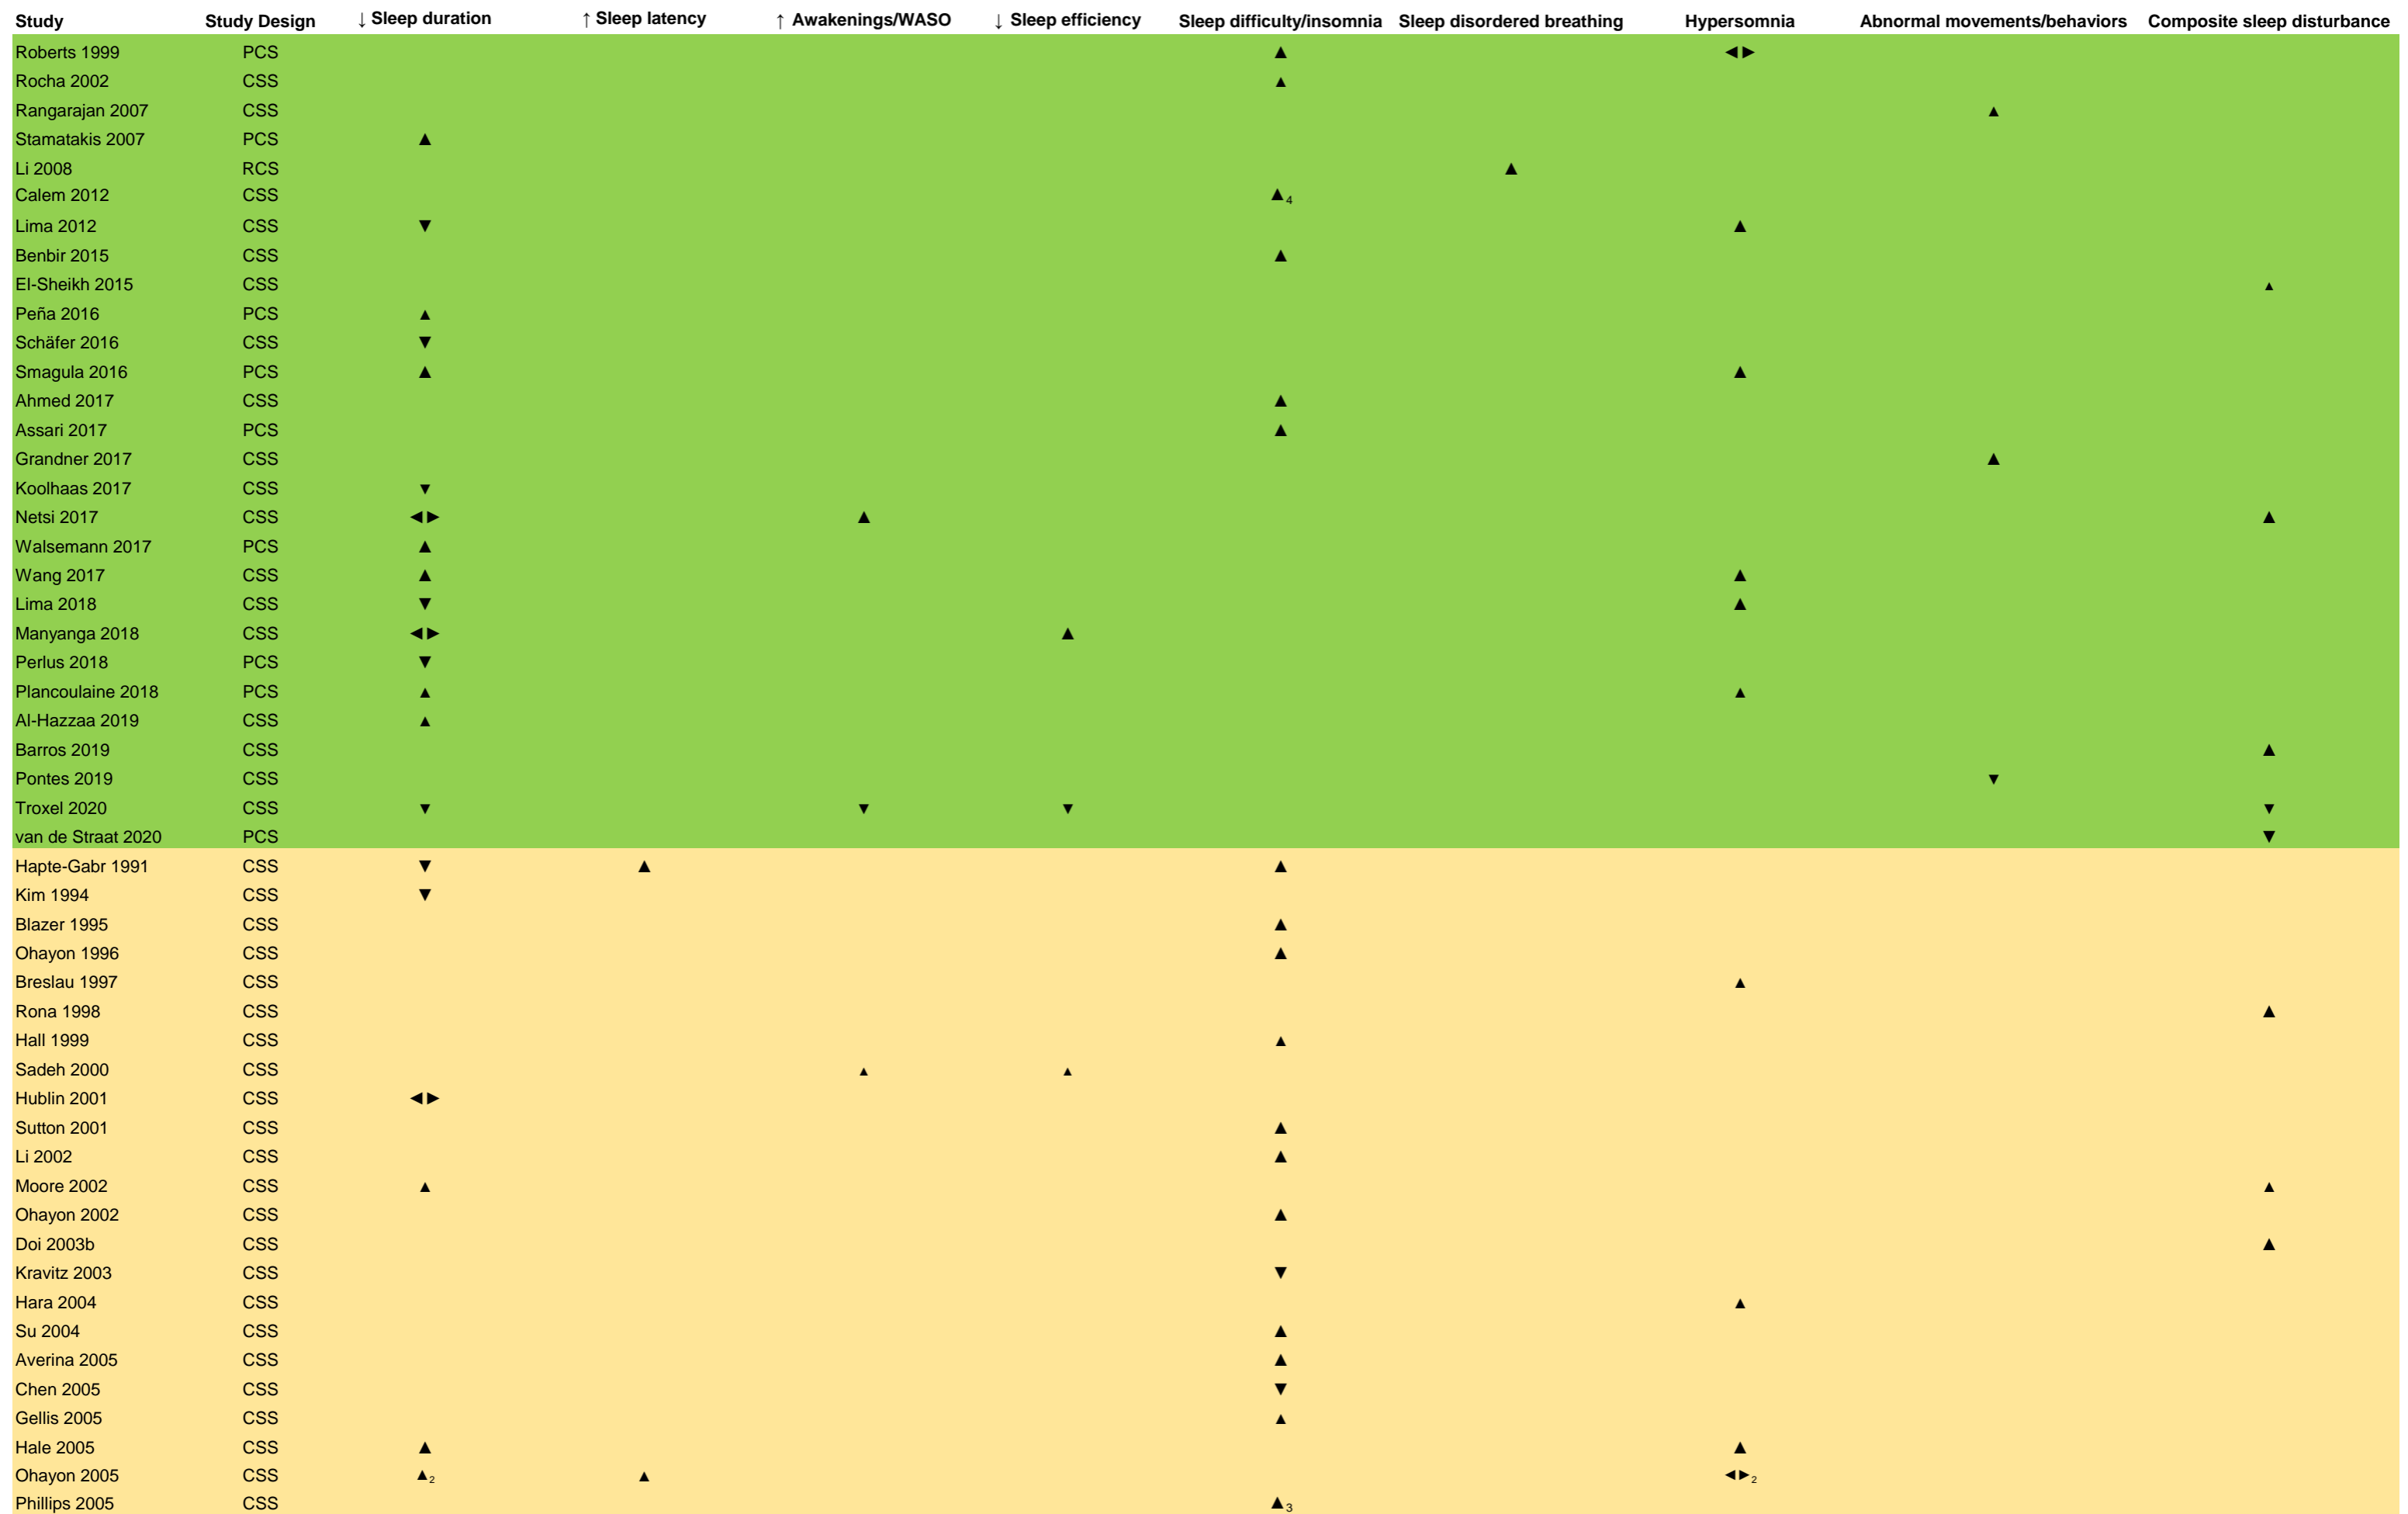

|                      |     |                |   |  |   |   |                |                |  |                |   |                 |
|----------------------|-----|----------------|---|--|---|---|----------------|----------------|--|----------------|---|-----------------|
| Tjepkema 2005        | CSS |                |   |  |   |   |                | ▲              |  |                |   |                 |
| Ursin 2005           | CSS | ▲              |   |  |   |   |                |                |  |                |   |                 |
| Lauderdale 2006      | CSS | ▲              | ▲ |  |   |   | ▲              |                |  |                |   |                 |
| Adam 2007            | CSS | ▼ <sub>2</sub> |   |  |   |   |                |                |  |                |   |                 |
| Friedman 2007        | CSS |                | ▲ |  |   |   | ▲ <sub>2</sub> |                |  |                |   |                 |
| Ozden 2007           | CSS |                |   |  |   |   |                |                |  |                | ▲ |                 |
| Blay 2008            | CSS |                |   |  |   |   |                |                |  |                |   | ▲               |
| Ekici 2008           | CSS |                |   |  | ▲ |   |                | ▲ <sub>2</sub> |  | ▲              |   |                 |
| Inan 2008            | CSS |                |   |  |   |   |                |                |  |                | ▲ |                 |
| Kuehni 2008          | CSS |                |   |  |   |   |                | ▲              |  |                |   |                 |
| Xiang 2008           | CSS |                |   |  |   |   |                | ▲ <sub>2</sub> |  |                |   |                 |
| Yao 2008             | CSS |                |   |  |   |   |                |                |  |                |   | ▼               |
| Arber 2009           | CSS |                |   |  |   |   |                | ▲              |  |                |   |                 |
| Baker 2009           | CSS |                |   |  |   |   |                |                |  | ▲              |   |                 |
| Hall 2009            | CSS | ▲              | ▲ |  |   | ▼ | ▲              |                |  |                |   | ▲               |
| Jiang 2009           | CSS | ▼              |   |  |   |   |                |                |  |                |   |                 |
| Joo 2009             | CSS |                |   |  |   |   |                |                |  | ▲              |   |                 |
| Kim 2009             | PCS |                |   |  |   |   |                | ▼              |  |                |   |                 |
| Krueger 2009         | CSS | ▲ <sub>2</sub> |   |  |   |   |                |                |  | ▲ <sub>2</sub> |   |                 |
| Sivertsen 2009       | CSS |                |   |  |   |   |                | ▲              |  |                |   |                 |
| Yang 2009            | CSS |                |   |  |   |   |                |                |  |                |   | ▼               |
| Fritsch Montero 2010 | CSS |                |   |  |   |   |                |                |  |                |   | ▲               |
| Grandner 2010        | CSS |                |   |  |   |   |                |                |  |                |   | ▲               |
| Gu 2010              | CSS | ▲ <sub>3</sub> |   |  |   |   |                |                |  | ▲ <sub>2</sub> |   | ◀▶              |
| Knutson 2010         | CSS | ▼              |   |  |   |   |                |                |  |                |   |                 |
| Lallukka 2010        | CSS |                |   |  |   |   |                | ▼              |  |                |   |                 |
| Li S 2010            | CSS |                |   |  |   |   |                |                |  | ▲              |   |                 |
| Mittelmark 2010      | CSS | ▲              |   |  |   |   |                |                |  |                |   |                 |
| Paparrigopoulos 2010 | CSS |                |   |  |   |   |                | ▲              |  |                |   |                 |
| Park 2010            | CSS | ▲ <sub>2</sub> |   |  |   |   |                |                |  | ▲ <sub>2</sub> |   |                 |
| Patel 2010           | CSS |                |   |  |   |   |                |                |  |                |   | ▲               |
| Amra 2011            | CSS |                |   |  |   |   |                |                |  | ▲              |   |                 |
| Bonuck 2011          | PCS |                |   |  |   |   |                |                |  | ▲              |   |                 |
| Eder 2011            | CSS | ▲              |   |  |   |   |                | ▼ <sub>3</sub> |  | ▲              |   | ◀▶ <sub>2</sub> |
| Hense 2011           | CSS | ▲              |   |  |   |   |                |                |  |                |   |                 |
| Pallesen 2011        | CSS |                |   |  |   |   |                |                |  | ▲              |   |                 |
| Ryu 2011             | CSS | ▲              |   |  |   |   |                |                |  | ▲              |   |                 |
| Wong 2011            | CSS |                |   |  |   |   |                |                |  |                |   | ▲               |
| Zhang 2011           | CSS |                |   |  |   |   |                | ▲              |  |                |   |                 |
| Adams 2012           | CSS |                |   |  |   |   |                |                |  | ▲              |   |                 |
| Blümel 2012          | CSS |                |   |  |   |   |                | ▲              |  |                |   | ▲               |
| Bøe 2012             | CSS | ▲              |   |  |   |   |                | ◀▶             |  |                |   |                 |
| Guo 2012             | CSS | ▼              |   |  |   |   |                |                |  |                |   |                 |
| Kachikis 2012        | CSS | ▼              |   |  |   |   |                |                |  |                |   | ◀▶              |
| Lallukka 2012        | CSS | ▲ <sub>3</sub> |   |  |   |   |                | ▲              |  | ▲ <sub>3</sub> |   |                 |
| Mazzotti 2012        | CSS |                |   |  |   |   |                |                |  |                |   | ▲               |
| Rosenbaum 2012       | CSS |                |   |  |   |   |                |                |  |                |   | ▲               |
| Soltani 2012         | CSS |                |   |  |   |   |                |                |  |                |   | ▲               |
| Stranges 2012        | CSS |                |   |  |   |   |                | ▲ <sub>2</sub> |  |                |   |                 |
| Talala 2012          | CSS |                |   |  |   |   |                | ▲              |  |                |   |                 |
| Tu 2012              | CSS | ▲ <sub>3</sub> |   |  |   |   |                |                |  | ▲ <sub>3</sub> |   |                 |
| Zhang 2012           | PCS |                |   |  |   |   |                | ▲              |  |                |   |                 |

|                     |     |                 |                |   |   |                 |                |                |    |   |
|---------------------|-----|-----------------|----------------|---|---|-----------------|----------------|----------------|----|---|
| Chen 2013           | CSS |                 |                |   |   | ◀▶ <sub>3</sub> |                |                |    |   |
| Grandner 2013       | CSS |                 | ▲              |   |   | ▼ <sub>4</sub>  | ▲ <sub>2</sub> | ▼              |    |   |
| Hartz 2013          | CSS |                 |                |   |   | ▲               |                |                |    |   |
| Innes 2013          | CSS |                 |                |   |   |                 |                |                | ▲  |   |
| Kim 2013            | CSS |                 |                |   |   | ▲ <sub>5</sub>  |                |                |    |   |
| Luo 2013            | CSS |                 |                |   |   |                 |                |                |    | ▼ |
| Mindell 2013        | CSS |                 |                |   |   |                 |                |                |    | ▲ |
| Basner 2014         | CSS | ▼               |                |   |   |                 |                | ▲              |    |   |
| Carrillo-Larco 2014 | CSS | ▼               |                |   |   |                 |                | ▲              |    |   |
| Gubelmann 2014      | CSS | ▼ <sub>2</sub>  |                |   |   |                 |                | ▲ <sub>2</sub> |    |   |
| Kang 2014           | CSS |                 |                |   |   |                 | ▲              |                |    |   |
| Leng 2014           | CSS | ▲               |                |   | ▲ |                 |                |                |    |   |
| Liviya NG 2014      | CSS |                 |                |   |   |                 |                | ▲              |    |   |
| McDonald 2014       | CSS | ▲               |                |   |   |                 |                |                |    |   |
| Pan 2014            | CSS |                 |                |   |   |                 | ▼              |                |    |   |
| Speirs 2014         | CSS | ▲               |                |   |   |                 |                |                |    |   |
| Whinnery 2014       | CSS | ▲ <sub>2</sub>  |                |   |   |                 |                | ▲              |    |   |
| Baiden 2015         | CSS |                 |                |   |   | ▲               |                |                |    |   |
| Bonke 2015          | CSS | ▲               |                |   |   |                 |                | ▲              |    |   |
| Cunningham 2015     | CSS | ▲               |                |   |   | ▲               |                | ▲ <sub>2</sub> |    |   |
| Gamaldo 2015        | CSS | ▲ <sub>2</sub>  |                |   |   |                 |                |                |    |   |
| Katainen 2015       | CSS |                 |                |   |   | ▲               |                |                |    |   |
| Kim 2015            | CSS | ◀▶ <sub>2</sub> |                |   |   |                 |                | ▲ <sub>2</sub> |    |   |
| Kurina 2015         | CSS | ▼               |                | ▲ | ▲ |                 |                |                |    |   |
| Nisar 2015          | CSS |                 |                |   |   | ▲               |                |                |    |   |
| Patel 2015          | CSS | ▲               |                |   |   |                 |                | ▲              |    |   |
| Stringhini 2015     | CSS | ◀▶ <sub>2</sub> | ▲ <sub>2</sub> |   | ▲ | ▲               |                | ▲              |    | ▲ |
| Suarez 2015         | CSS | ▲               | ▲              |   |   |                 | ▲              | ▲              |    | ▲ |
| van de Straat 2015  | CSS |                 |                |   |   |                 |                |                |    | ▲ |
| Yoon 2015           | CSS | ▲               |                |   |   |                 |                | ▲              |    |   |
| de Ruitter 2016     | CSS | ▲               |                |   |   |                 |                |                |    |   |
| Hawkins 2016        | CSS | ▼               |                |   |   |                 |                |                |    |   |
| Johnson 2016        | CSS | ▲               |                |   |   |                 |                | ▲              |    | ▲ |
| Malone 2016         | CSS | ▲               |                |   |   |                 |                | ▲              |    |   |
| Paine 2016b         | CSS |                 |                | ▲ |   | ▲ <sub>2</sub>  |                |                |    |   |
| Seyedmehdi 2016     | CSS |                 |                |   |   |                 | ▲              |                |    |   |
| Wong 2016           | CSS |                 |                |   |   |                 |                |                | ▲  |   |
| Abraham 2017        | CSS |                 |                |   |   |                 |                |                |    | ▼ |
| Barazzetta 2017     | PCS | ◀▶ <sub>4</sub> |                |   |   | ▲ <sub>4</sub>  |                |                | ◀▶ |   |
| Cheng 2017          | PCS | ▲ <sub>3</sub>  |                |   |   |                 |                | ▲              |    |   |
| Costanian 2017      | CSS | ▲               |                |   |   |                 |                |                |    |   |
| Didriksen 2017      | CSS |                 |                |   |   |                 |                |                | ▲  |   |
| Ham 2017            | CSS |                 |                |   |   | ▲               |                |                |    | ▲ |
| Ma JF 2017          | CSS |                 |                |   |   |                 |                |                | ▲  |   |
| Ma Y 2017           | CSS |                 |                |   |   |                 | ▲              |                |    |   |
| Palmer 2017         | CSS |                 |                |   |   | ▲ <sub>5</sub>  |                |                |    |   |
| Perales 2017        | CSS | ▲               |                |   |   |                 |                |                |    |   |
| Tang 2017           | CSS |                 |                |   |   |                 |                |                |    | ▼ |
| Yunus 2017          | CSS |                 |                |   |   |                 |                |                |    | ▲ |
| Zhang 2017          | CSS |                 |                |   |   |                 |                |                |    | ▲ |
| Cha 2018            | CSS | ▼               |                |   |   |                 |                |                |    |   |
| Chang 2018          | CSS | ▲               |                |   |   |                 |                | ▲              |    |   |



| Author (Year)  | Study Design | Effect Direction | Sample Size    | Study Quality | Binomial proportions % (95% CI) | p-value  |
|----------------|--------------|------------------|----------------|---------------|---------------------------------|----------|
| El-Sheikh 2013 | CSS          | ▲                | ▲              | ▲             | 65.9 (55.4, 75.3)               | p 0.005  |
| Jarrin 2013    | CSS          | ▼                | ▲              | ▲             | 100.0 (81.5, 100.0)             | p <0.001 |
| Jarrin 2014    | CSS          | ◄► <sub>2</sub>  | ▲              | ▲             | 77.8 (45.6, 95.1)               | p 0.180  |
| Karaman 2014   | CSS          |                  | ▲              | ▲             | 90.9 (64.7, 99.0)               | p 0.012  |
| Buxton 2015    | CSS          | ▲                | ▲              | ▲             | 81.2 (70.4, 89.3)               | p <0.001 |
| Tareque 2016   | CSS          |                  | ▲              | ▲             | 88.9 (68.9, 97.6)               | p 0.001  |
| Brambilla 2017 | CSS          |                  | ▲              | ▲             | 95.7 (86.8, 99.1)               | p <0.001 |
| Foroughi 2017  | CSS          |                  | ▲              | ▲             | 90.0 (61.9, 98.9)               | p 0.021  |
| Kim 2017       | CSS          |                  | ▲              | ▲             | 81.8 (70.1, 90.3)               | p <0.001 |
| McDowall 2017  | CSS          | ▲                | ▲              | ▲             |                                 |          |
| de Jonge 2018  | PCS          |                  | ▼              | ▲             |                                 |          |
| Khan 2018      | CSS          |                  | ▼              | ▲             |                                 |          |
| Akay 2019      | CSS          | ▲                | ▲              | ▲             |                                 |          |
| Bazargan 2019  | CSS          |                  | ▼              | ▲             |                                 |          |
| Matenchuk 2019 | CSS          | ▲                | ▲              | ▲             |                                 |          |
| Petrovic 2019  | CSS          |                  | ▲              | ▲             |                                 |          |
| Poulain 2019   | CSS          |                  | ▲              | ▲             |                                 |          |
| Metse 2020     | CSS          | ▲                | ▲              | ▲             |                                 |          |
| Seaton 2020    | CSS          | ▲                | ▲              | ▲             |                                 |          |
| Sundbom 2020   | CSS          |                  | ▲ <sub>4</sub> | ▲             |                                 |          |
| Wu 2020        | CSS          |                  | ▲              | ▲             |                                 |          |

**LEGEND**  
 Study design: CSS = Cross-Sectional Study; PCS = Prospective Cohort Study; RCS = Retrospective Cohort Study  
 Effect direction: upward arrow ▲ = expected direction (low SES → poor sleep), downward arrow ▼ = opposite direction (high SES → poor sleep), sideways arrow ◄► = no direction/mixed effects/conflicting findings  
 Sample size: Large arrow ▲ >1,500; medium arrow ▲ 250-1,500; small arrow ▲ <250  
 Study quality (denoted by row colour): green = good; amber = fair; red = poor





| Author (Year)            | Study Design | Effect Direction | Sample Size | Study Quality |
|--------------------------|--------------|------------------|-------------|---------------|
| Vézina-Im 2019           | CSS          | ◄►               |             | Amber         |
| Wang 2019                | CSS          |                  |             | Amber         |
| Yao 2019                 | CSS          |                  |             | Amber         |
| Chami 2020               | CSS          | ◄►               |             | Amber         |
| Visvalingam 2020         | CSS          | ▼                |             | Amber         |
| Chervin 2003             | CSS          |                  |             | Red           |
| McLaughlin Crabtree 2005 | CSS          | ▲                |             | Red           |
| Jean-Louis 2008          | CSS          | ▲                |             | Red           |
| McHale 2011              | CSS          | ▼                |             | Red           |
| Pigeon 2011              | CSS          |                  |             | Red           |
| Heilemann 2012           | CSS          | ▲                |             | Red           |
| El-Sheikh 2013           | CSS          | ▲                |             | Red           |
| Jarrin 2013              | CSS          | ▲                |             | Red           |
| Jarrin 2014              | CSS          | ▲                |             | Red           |
| Karaman 2014             | CSS          |                  |             | Red           |
| Seib 2014                | CSS          |                  |             | Red           |
| de Jong 2016             | CSS          | ▲                |             | Red           |
| McDowall 2017            | CSS          | ▲                |             | Red           |
| Akay 2019                | CSS          | ▲                |             | Red           |
| Poulain 2019             | CSS          |                  |             | Red           |
| Seaton 2020              | CSS          | ▼                |             | Red           |
| Tomaso 2020              | CSS          |                  |             | Red           |

Binomial proportions % (95% CI)     62.0 (48.2, 74.5) p 0.120     100.0 (70.8, 100.0) p 0.016)     100.0 (55.5, 100.0) p 0.125     100.0 (67.0, 100.0) p 0.031     83.9 (68.2, 93.6) p <0.001     100.0 (67.0, 100.0) p 0.031     85.7 (69.5, 95.0) p <0.001     100.0 (73.8, 100.0) p 0.008     80.6 (65.6, 90.9) p <0.001

LEGEND  
Study design: CSS = Cross-Sectional Study; PCS = Prospective Cohort Study; RCS = Retrospective Cohort Study  
Effect direction: upward arrow ▲ = expected direction (low SES → poor sleep), downward arrow ▼ = opposite direction (high SES → poor sleep), sideways arrow ◄► = no direction/mixed effects/conflicting findings  
Sample size: Large arrow ▲ >1,500; medium arrow ▲ 250-1,500; small arrow ▲ <250  
Study quality (denoted by row colour): green = good; amber = fair; red = poor





|                                 |     |                           |                             |                           |                            |                            |                            |                            |                             |                           |   |
|---------------------------------|-----|---------------------------|-----------------------------|---------------------------|----------------------------|----------------------------|----------------------------|----------------------------|-----------------------------|---------------------------|---|
| Kidwai 2013                     | CSS |                           |                             |                           |                            |                            | ▲                          |                            |                             |                           |   |
| Mindell 2013                    | CSS |                           |                             |                           |                            |                            |                            |                            |                             |                           | ▲ |
| Basner 2014                     | CSS | ▼                         |                             |                           |                            |                            |                            |                            |                             |                           | ▲ |
| Carrillo-Larco 2014             | CSS | ▼                         |                             |                           |                            |                            |                            |                            |                             |                           | ▲ |
| Leng 2014                       | CSS | ▼                         |                             |                           |                            | ▲                          |                            |                            |                             |                           |   |
| Speirs 2014                     | CSS | ▼                         |                             |                           |                            |                            |                            |                            |                             |                           |   |
| Uhlig 2014                      | CSS |                           |                             |                           |                            |                            | ▼                          |                            |                             |                           |   |
| Bonke 2015                      | CSS | ▼                         |                             |                           |                            |                            |                            |                            |                             |                           | ▲ |
| Katainen 2015                   | CSS |                           |                             |                           |                            |                            | ▲                          |                            |                             |                           |   |
| Nisar 2015                      | CSS |                           |                             |                           |                            |                            | ▼                          |                            |                             |                           |   |
| Patel 2015                      | CSS | ▼                         |                             |                           |                            |                            |                            |                            |                             |                           | ▲ |
| Stringhini 2015                 | CSS | ▼                         |                             |                           |                            |                            | ▲                          |                            |                             |                           | ▲ |
| Suarez 2015                     | CSS | ▲                         |                             |                           |                            |                            |                            |                            | ▲                           |                           | ▲ |
| van de Straat 2015              | CSS |                           |                             |                           | ▲                          |                            |                            |                            |                             |                           | ▲ |
| Hawkins 2016                    | CSS | ▲                         |                             |                           |                            |                            |                            |                            |                             |                           |   |
| Malone 2016                     | CSS | ▲                         |                             |                           |                            |                            |                            |                            |                             |                           | ▲ |
| Paine 2016a                     | CSS | ▲                         |                             |                           |                            |                            |                            |                            |                             |                           | ▲ |
| Costanian 2017                  | CSS | ▼                         |                             |                           |                            |                            |                            |                            |                             |                           |   |
| Ham 2017                        | CSS |                           |                             |                           |                            |                            | ▲                          |                            |                             |                           | ▼ |
| Palmer 2017                     | CSS |                           |                             |                           |                            |                            | ▲ <sub>5</sub>             |                            |                             |                           |   |
| Perales 2017                    | CSS | ▼                         |                             |                           |                            |                            |                            |                            |                             |                           |   |
| Yu 2017                         | CSS | ▼                         |                             |                           |                            |                            |                            |                            |                             |                           |   |
| Cha 2018                        | CSS | ▲                         |                             |                           |                            |                            |                            |                            |                             |                           |   |
| Chang 2018                      | CSS | ▼                         |                             |                           |                            |                            |                            |                            |                             |                           | ▲ |
| Gómez-Olivé 2018                | CSS | ▼                         |                             |                           |                            |                            |                            |                            | ◀▶                          |                           | ▲ |
| Goyal 2018                      | CSS |                           |                             |                           |                            |                            |                            |                            | ▼                           |                           |   |
| Jaisoorya 2018                  | CSS |                           |                             |                           |                            |                            | ▲ <sub>2</sub>             |                            |                             |                           |   |
| Ma J 2018                       | CSS |                           |                             |                           |                            |                            |                            |                            |                             |                           | ▼ |
| Pepin 2018                      | CSS | ▼                         |                             |                           |                            |                            |                            |                            |                             |                           |   |
| Schlieber 2018                  | CSS | ▼                         |                             |                           |                            |                            |                            |                            |                             |                           |   |
| Wu 2018                         | CSS |                           |                             |                           |                            |                            |                            |                            |                             |                           | ▲ |
| Zheng 2018a                     | CSS |                           |                             |                           |                            |                            | ▼ <sub>3</sub>             |                            |                             |                           |   |
| Zheng 2018b                     | CSS | ▲                         |                             |                           |                            |                            |                            |                            |                             |                           | ▲ |
| Chami 2019                      | CSS |                           |                             |                           |                            |                            |                            |                            |                             | ▲                         |   |
| Hartescu 2019                   | CSS |                           |                             |                           |                            |                            | ▲                          |                            |                             |                           |   |
| Lee ES 2019                     | CSS | ▲                         |                             |                           |                            |                            |                            |                            |                             |                           |   |
| Maeda 2019                      | CSS |                           |                             |                           |                            |                            | ▲                          |                            |                             |                           |   |
| Sheehan 2019                    | CSS | ▼                         |                             |                           |                            |                            |                            |                            |                             | ▲                         |   |
| Yao 2019                        | CSS |                           |                             |                           |                            |                            |                            |                            |                             | ▲                         |   |
| Chami 2020                      | CSS | ▼                         |                             |                           |                            |                            |                            |                            |                             | ▲                         |   |
| Ito 2000                        | CSS |                           |                             |                           |                            |                            |                            |                            |                             | ▲                         |   |
| Terzano 2004                    | CSS |                           |                             |                           |                            |                            | ▲                          |                            |                             |                           |   |
| BaHammam 2006                   | CSS | ▼                         |                             |                           |                            |                            |                            |                            |                             |                           |   |
| Goodin 2010                     | CSS |                           |                             |                           |                            |                            |                            |                            |                             |                           | ▼ |
| Pigeon 2011                     | CSS |                           |                             |                           |                            |                            |                            |                            |                             |                           | ▲ |
| Heilemann 2012                  | CSS |                           |                             |                           |                            |                            | ▲                          |                            |                             |                           |   |
| Nishikitani 2012                | CSS | ▼                         |                             |                           |                            |                            | ▲                          |                            |                             |                           |   |
| Seib 2014                       | CSS |                           |                             |                           |                            |                            |                            |                            |                             |                           | ▲ |
| Khan 2018                       | CSS |                           |                             |                           |                            |                            | ▲                          |                            |                             |                           |   |
| Akay 2019                       | CSS | ▼                         |                             |                           |                            |                            |                            |                            |                             |                           | ▼ |
| Binomial proportions % (95% CI) |     | 31.7 (19.1, 46.8) p 0.029 | 100.0 (67.0, 100.0) p 0.031 | 50.0 (6.1, 93.9) p >0.999 | 66.7 (17.7, 96.1) p >0.999 | 87.5 (73.0, 95.6) p <0.001 | 66.7 (17.7, 96.1) p >0.999 | 91.7 (75.9, 98.2) p <0.001 | 100.0 (55.5, 100.0) p 0.125 | 77.3 (57.1, 90.8) p 0.017 |   |

LEGEND

Study design: CSS = Cross-Sectional Study; PCS = Prospective Cohort Study; RCS = Retrospective Cohort Study

Effect direction: upward arrow ▲ = expected direction (low SES → poor sleep), downward arrow ▼ = opposite direction (high SES → poor sleep), sideways arrow ◀▶ = no direction/mixed effects/conflicting findings

Sample size: Large arrow ▲ >1,500; medium arrow ▲ 250-1,500; small arrow ▲ <250

Study quality (denoted by row colour): green = good; amber = fair; red = poor

**Figure S4**—Effect direction plot for the association between occupation and sleep outcomes.

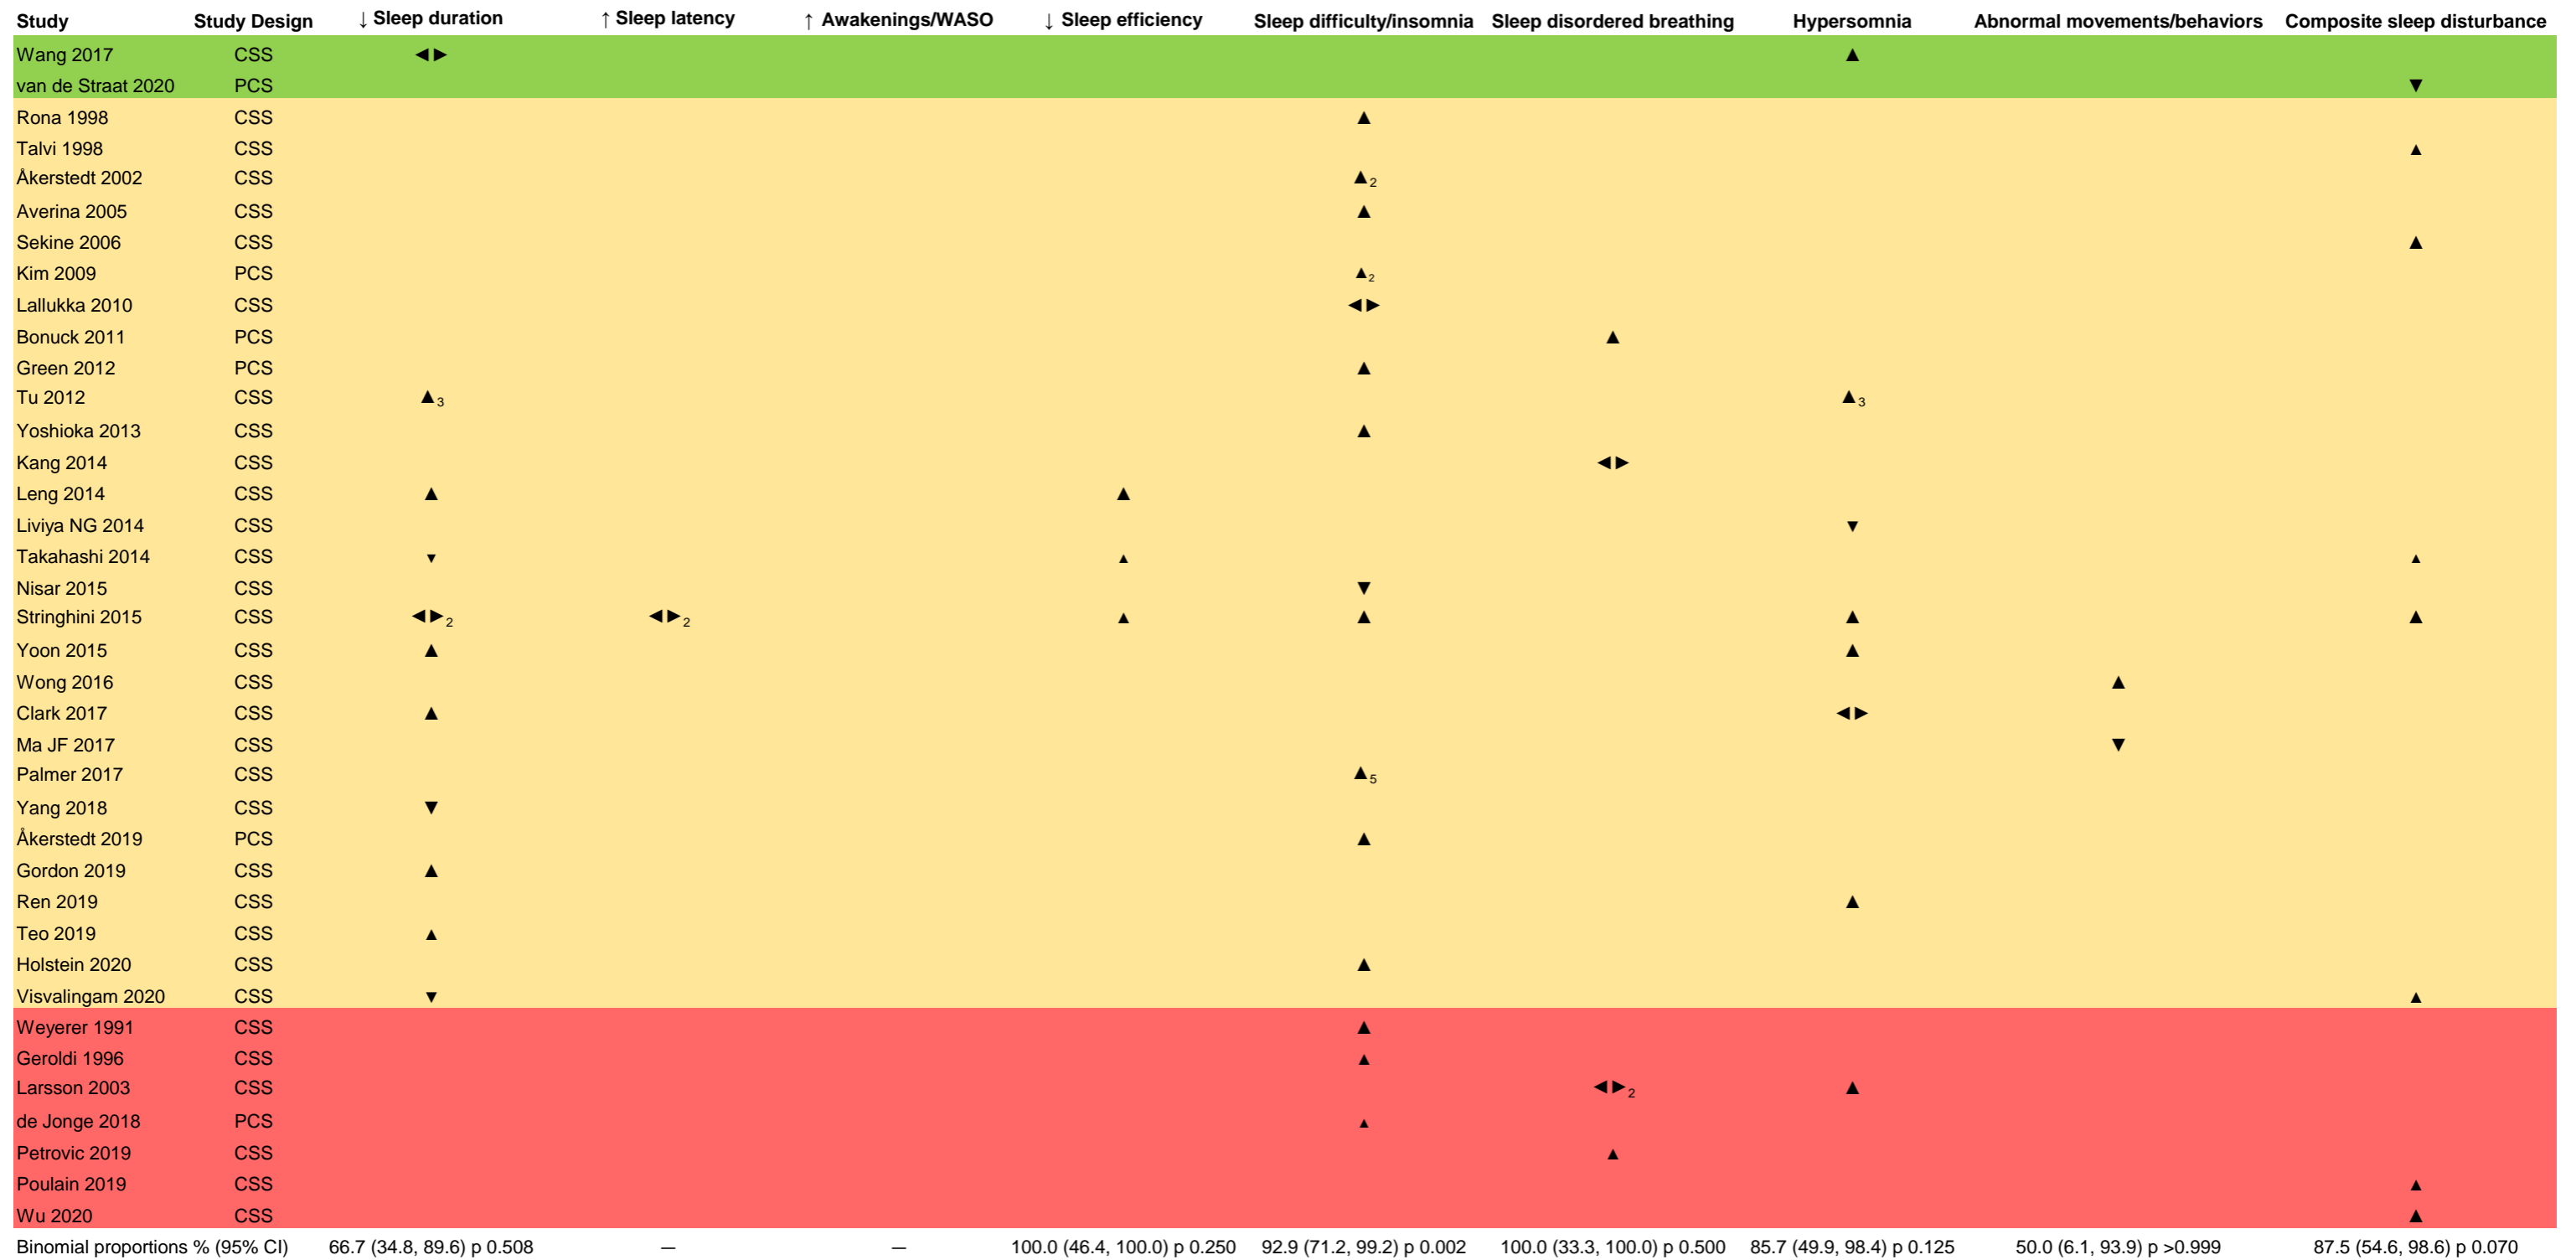

LEGEND  
 Study design: CSS = Cross-Sectional Study; PCS = Prospective Cohort Study; RCS = Retrospective Cohort Study  
 Effect direction: upward arrow ▲ = expected direction (low SES → poor sleep), downward arrow ▼ = opposite direction (high SES → poor sleep), sideways arrow ◄► = no direction/mixed effects/conflicting findings  
 Sample size: Large arrow ▲ >1,500; medium arrow ▲ 250-1,500; small arrow ▲ <250  
 Study quality (denoted by row colour): green = good; amber = fair; red = poor

**Figure S5**—Effect direction plot for the association between assets and sleep outcomes.

| Study                           | Study Design | ↓ Sleep duration           | ↑ Sleep latency | ↑ Awakenings/WASO | ↓ Sleep efficiency           | Sleep difficulty/insomnia | Sleep disordered breathing  | Hypersomnia                | Abnormal movements/behaviors | Composite sleep disturbance |
|---------------------------------|--------------|----------------------------|-----------------|-------------------|------------------------------|---------------------------|-----------------------------|----------------------------|------------------------------|-----------------------------|
| Perlus 2018                     | PCS          | ▲                          |                 |                   |                              |                           |                             |                            |                              |                             |
| Wendt 2020                      | CSS          | ▲                          |                 |                   | ▲                            |                           |                             |                            |                              |                             |
| Li 2002                         | CSS          |                            |                 |                   |                              | ▲                         |                             |                            |                              |                             |
| Arber 2009                      | CSS          |                            |                 |                   |                              | ▲                         |                             |                            |                              |                             |
| Kim 2009                        | PCS          |                            |                 |                   |                              | ▲ <sub>2</sub>            |                             |                            |                              |                             |
| Fritsch Montero 2010            | CSS          |                            |                 |                   |                              |                           |                             |                            |                              | ▲                           |
| Lallukka 2010                   | CSS          |                            |                 |                   |                              | ▲                         |                             |                            |                              |                             |
| Mittelmark 2010                 | CSS          | ▼                          |                 |                   |                              |                           |                             |                            |                              |                             |
| Bonuck 2011                     | PCS          |                            |                 |                   |                              |                           | ▲                           |                            |                              |                             |
| Kachikis 2012                   | CSS          | ▼                          |                 |                   |                              |                           |                             |                            |                              | ▼                           |
| Mazzotti 2012                   | CSS          |                            |                 |                   |                              |                           |                             |                            |                              | ▲                           |
| Soltani 2012                    | CSS          |                            |                 |                   |                              |                           |                             |                            |                              | ▲                           |
| Stranges 2012                   | CSS          |                            |                 |                   |                              | ▼ <sub>2</sub>            |                             |                            |                              |                             |
| Carrillo-Larco 2014             | CSS          |                            |                 |                   |                              |                           |                             | ▲                          |                              |                             |
| Whinnery 2014                   | CSS          | ▼ <sub>2</sub>             |                 |                   |                              |                           |                             | ▼                          |                              |                             |
| Patel 2015                      | CSS          | ◄►                         |                 |                   |                              |                           |                             | ▲                          |                              |                             |
| van de Straat 2015              | CSS          |                            |                 |                   |                              |                           |                             |                            |                              | ▲                           |
| Barazzetta 2017                 | PCS          | ▲ <sub>4</sub>             |                 |                   |                              | ▲ <sub>4</sub>            |                             |                            | ◄►                           |                             |
| Cheng 2017                      | PCS          | ◄► <sub>3</sub>            |                 |                   |                              |                           |                             | ▼                          |                              |                             |
| Palmer 2017                     | CSS          |                            |                 |                   |                              | ▲ <sub>5</sub>            |                             |                            |                              |                             |
| Perales 2017                    | CSS          | ▲                          |                 |                   |                              |                           |                             |                            |                              |                             |
| Gómez-Olivé 2018                | CSS          | ▼                          |                 |                   |                              |                           | ▲                           |                            |                              | ▲                           |
| Ma J 2018                       | CSS          |                            |                 |                   |                              |                           |                             |                            |                              | ▼                           |
| Peltzer 2018                    | CSS          | ▼                          |                 |                   |                              |                           |                             | ▲                          |                              |                             |
| Teo 2019                        | CSS          | ▲                          |                 |                   |                              |                           |                             |                            |                              |                             |
| Wendt 2019                      | CSS          |                            |                 |                   |                              |                           |                             |                            |                              | ▼                           |
| Hopton 1992                     | CSS          |                            |                 |                   |                              | ▲                         |                             |                            |                              |                             |
| Bapat 2017                      | CSS          | ▼                          |                 |                   |                              |                           |                             |                            |                              |                             |
| Binomial proportions % (95% CI) |              | 45.5 (20.0, 73.0) p >0.999 | —               | —                 | 100.0 (14.7, 100.0) p >0.999 | 87.5 (54.6, 98.6) p 0.070 | 100.0 (33.3, 100.0) p 0.500 | 60.0 (20.9, 90.6) p >0.999 | —                            | 62.5 (29.5, 88.1) p 0.727   |

**LEGEND**  
 Study design: CSS = Cross-Sectional Study; PCS = Prospective Cohort Study; RCS = Retrospective Cohort Study  
 Effect direction: upward arrow ▲ = expected direction (low SES → poor sleep), downward arrow ▼ = opposite direction (high SES → poor sleep), sideways arrow ◄► = no direction/mixed effects/conflicting findings  
 Sample size: Large arrow ▲ >1,500; medium arrow ▲ 250-1,500; small arrow ▲ <250  
 Study quality (denoted by row colour): green = good; amber = fair; red = poor

**Figure S6**—Effect direction plot for the association between composite socioeconomic status and sleep outcomes.

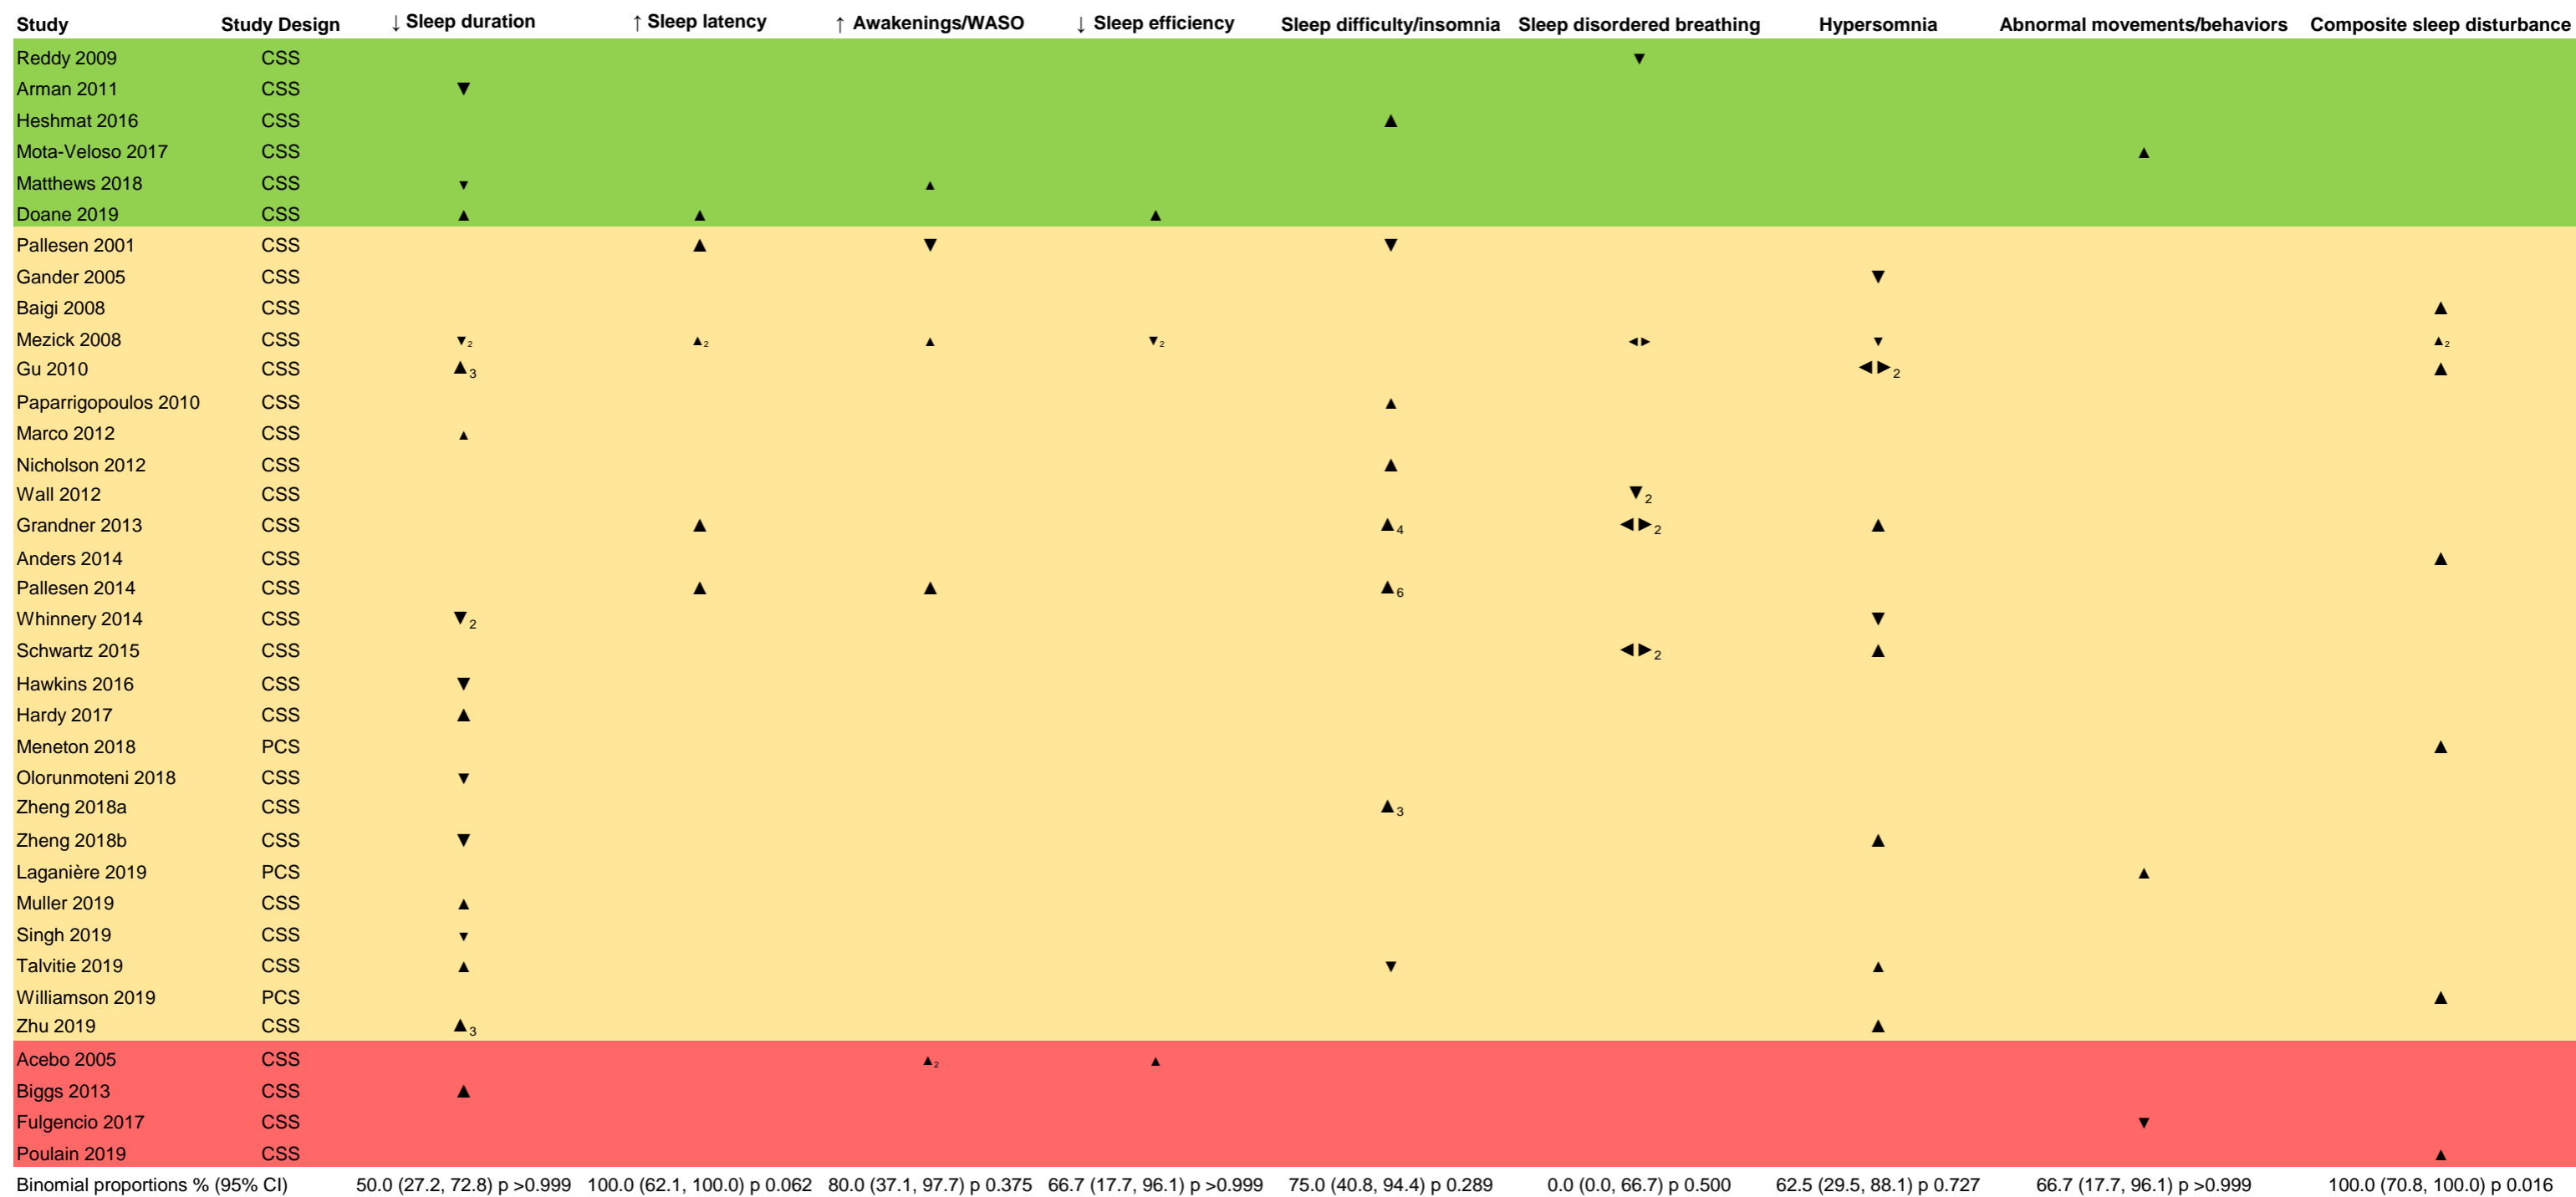

LEGEND  
 Study design: CSS = Cross-Sectional Study; PCS = Prospective Cohort Study; RCS = Retrospective Cohort Study  
 Effect direction: upward arrow ▲ = expected direction (low SES → poor sleep), downward arrow ▼ = opposite direction (high SES → poor sleep), sideways arrow ◄► = no direction/mixed effects/conflicting findings  
 Sample size: Large arrow ▲ >1,500; medium arrow ▲ 250-1,500; small arrow ▲ <250  
 Study quality (denoted by row colour): green = good; amber = fair; red = poor

**Figure S7**—Effect direction plot for the association between subjective socioeconomic status and sleep outcomes.

| Study              | Study Design | ↓ Sleep duration | ↑ Sleep latency | ↑ Awakenings/WASO | ↓ Sleep efficiency | Sleep difficulty/insomnia | Sleep disordered breathing | Hypersomnia     | Abnormal movements/behaviors | Composite sleep disturbance |
|--------------------|--------------|------------------|-----------------|-------------------|--------------------|---------------------------|----------------------------|-----------------|------------------------------|-----------------------------|
| Roberts 1999       | PCS          |                  |                 |                   |                    | ▼                         |                            | ▲               |                              |                             |
| El-Sheikh 2015     | CSS          |                  |                 |                   |                    |                           |                            |                 |                              | ▲                           |
| Troxel 2020        | CSS          | ▲                |                 | ▲                 | ▲                  |                           |                            |                 |                              | ▲                           |
| van de Straat 2020 | PCS          |                  |                 |                   |                    |                           |                            |                 |                              | ▲                           |
| Hall 1999          | CSS          |                  |                 |                   |                    | ▲                         |                            |                 |                              |                             |
| Roberts 2004       | CSS          |                  |                 |                   |                    | ▲                         |                            |                 |                              |                             |
| Hall 2009          | CSS          | ▼                | ▲               | ▲                 | ▼                  |                           |                            |                 |                              | ▲                           |
| Gu 2010            | CSS          | ▲ <sub>3</sub>   |                 |                   |                    |                           |                            | ◄◄ <sub>2</sub> |                              | ▲                           |
| Lallukka 2010      | CSS          |                  |                 |                   |                    | ▲                         |                            |                 |                              |                             |
| Nomura 2010        | CSS          |                  |                 |                   |                    | ▲                         |                            |                 |                              |                             |
| Bøe 2012           | CSS          | ▲                |                 |                   |                    | ▲                         |                            |                 |                              |                             |
| Mazzotti 2012      | CSS          |                  |                 |                   |                    |                           |                            |                 |                              | ▲                           |
| Grandner 2013      | CSS          |                  | ▲               |                   |                    | ▲ <sub>4</sub>            | ▲ <sub>2</sub>             | ▲               |                              |                             |
| Kidwai 2013        | CSS          |                  |                 |                   |                    | ▲                         |                            |                 |                              |                             |
| Gjevre 2014        | CSS          |                  |                 |                   |                    |                           |                            | ▲               |                              |                             |
| Whinnery 2014      | CSS          | ▲ <sub>2</sub>   |                 |                   |                    |                           |                            | ▲               |                              |                             |
| Ding 2015          | CSS          | ▲                | ▲               |                   |                    | ▲                         |                            |                 |                              |                             |
| Peltzer 2015       | CSS          |                  |                 |                   |                    | ▲                         |                            |                 |                              |                             |
| Peltzer 2016       | CSS          | ▲                |                 |                   |                    |                           |                            | ◄◄              |                              |                             |
| Palmer 2017        | CSS          |                  |                 |                   |                    | ▲ <sub>5</sub>            |                            |                 |                              |                             |
| Perales 2017       | CSS          | ▲                |                 |                   |                    |                           |                            |                 |                              |                             |
| Vermeiren 2018     | CSS          | ▲                |                 |                   |                    |                           |                            |                 |                              |                             |
| Peltzer 2019       | CSS          |                  |                 |                   |                    | ▲                         |                            |                 |                              |                             |
| Li 2020            | CSS          |                  |                 |                   |                    |                           |                            |                 |                              | ▲                           |
| Adler 2000         | CSS          |                  | ▲               |                   |                    |                           |                            |                 |                              |                             |
| Goodin 2010        | CSS          |                  |                 |                   |                    |                           |                            |                 |                              | ▲                           |
| McHale 2011        | CSS          | ▲                |                 |                   |                    |                           |                            |                 |                              |                             |
| El-Sheikh 2013     | CSS          | ▲                |                 |                   | ▲                  |                           |                            |                 |                              | ▲                           |
| Jarrin 2013        | CSS          | ▲                | ▲               |                   |                    |                           |                            | ▲               |                              | ▲                           |
| Jarrin 2014        | CSS          | ◄◄ <sub>2</sub>  |                 |                   |                    | ▲                         |                            | ▲               |                              | ◄◄                          |
| Kim 2017           | CSS          |                  |                 |                   |                    | ▲                         |                            |                 |                              |                             |
| Counts 2018        | CSS          |                  |                 |                   |                    |                           |                            |                 |                              | ▲                           |
| Bazargan 2019      | CSS          |                  |                 |                   |                    | ▲                         |                            |                 |                              |                             |
| Nagata 2019        | CSS          |                  |                 |                   |                    | ▲ <sub>2</sub>            |                            |                 |                              |                             |
| Nasim 2019         | CSS          | ▲                |                 |                   |                    |                           |                            |                 |                              |                             |
| Zvolensky 2021     | CSS          |                  |                 |                   |                    | ▲                         |                            |                 |                              |                             |

Binomial proportions % (95% CI)    92.3 (69.3, 99.2) p 0.003    100.0 (62.1, 100.0) p 0.062    100.0 (33.3, 100.0) p 0.500    66.7 (17.7, 96.1) p >0.999    94.1 (75.6, 99.4) p <0.001    100.0 (14.7, 100.0) p >0.999    100.0 (67.0, 100.0) p 0.031    —    100.0 (80.0, 100.0) p 0.001

**LEGEND**  
 Study design: CSS = Cross-Sectional Study; PCS = Prospective Cohort Study; RCS = Retrospective Cohort Study  
 Effect direction: upward arrow ▲ = expected direction (low SES → poor sleep), downward arrow ▼ = opposite direction (high SES → poor sleep), sideways arrow ◄► = no direction/mixed effects/conflicting findings  
 Sample size: Large arrow ▲ >1,500; medium arrow ▲ 250-1,500; small arrow ▲ <250  
 Study quality (denoted by row colour): green = good; amber = fair; red = poor

**Table S1**—Characteristics of included studies and narrative presentation of main outcomes and significant interactions/mediations for the association between SES and sleep outcomes.

| Study           | Design/Population                                                                                                      | SES measures                                                                                                                                                               | Sleep measures                                                      | Main effects                                                                                                  | Interactions/Mediations |
|-----------------|------------------------------------------------------------------------------------------------------------------------|----------------------------------------------------------------------------------------------------------------------------------------------------------------------------|---------------------------------------------------------------------|---------------------------------------------------------------------------------------------------------------|-------------------------|
| Hapte-Gabr 1991 | Cross-sectional<br>3097 adults ≥65y from the general population of two Iowa counties                                   | Education (less than high school, high school, more than high school)<br>Employment status (working, not working)                                                          | Self-reported sleep latency (>30 min vs <30 min) and sleep duration | Working women and with higher education got fewer hours of sleep than did not working and less educated women |                         |
| Moffitt 1991    | Cross-sectional<br>1765 adults from the general population of three local government areas in South Australia          | Annual household income                                                                                                                                                    | Sleep subscale of the Nottingham health profile                     | Low income was associated with more sleep problems                                                            |                         |
| Weyerer 1991    | Cross-sectional<br>1536 subjects >15y from the general population of three rural communities in Upper Bavaria, Germany | Occupational class (upper/middle vs lower)                                                                                                                                 | Insomnia symptoms assessed with the Clinical Interview Schedule     | There was no significant relationship between occupational class and mild or moderate/severe insomnia         |                         |
| Hopton 1992     | Cross-sectional<br>830 general practice attenders >16 y in Lothian region, Scotland                                    | Social class (based on occupational classification)<br>Home and car ownership<br>Education (having further education vs not)<br>Employment status (employed vs unemployed) | Sleep subscale of the Nottingham health profile (zero vs positive)  | Less education and no home ownership predicted greater sleep distress                                         |                         |
| Kim 1994        | Cross-sectional<br>5198 adults 20-59y from the general population of Korea                                             | Education (no regular schooling and primary school, middle school, high school, junior college and over)                                                                   | Sleeping time (adequate vs inadequate)                              | Inadequate sleeping was not related with educational attainment                                               |                         |
| Blazer 1995     | Cross-sectional<br>3976 adults ≥65y from the general population of five counties in North Carolina                     | Education                                                                                                                                                                  | Insomnia symptoms (high vs low nighttime sleep complaints)          | Education was not associated with sleep complaints                                                            |                         |
| Geroldi 1996    | Cross-sectional<br>449 adults ≥75y from the general population of Brescia and Padua, Italy                             | Principal lifetime occupation (white-collar workers, tradesmen and craftsmen, blue-collar workers, housewives)                                                             | Insomnia symptoms frequency (five-point scale)                      | White-collar workers had significantly less insomnia symptoms than blue-collar workers                        |                         |



|                 |                                                                                                                  |                                                                                                                                                                             |                                                                                                    |                                                                                                 |                                                                                                                                                       |
|-----------------|------------------------------------------------------------------------------------------------------------------|-----------------------------------------------------------------------------------------------------------------------------------------------------------------------------|----------------------------------------------------------------------------------------------------|-------------------------------------------------------------------------------------------------|-------------------------------------------------------------------------------------------------------------------------------------------------------|
| Ohayon 1996     | Cross-sectional<br>5622 subjects $\geq 15$ y from the general French population                                  | Educational level (high vs low)<br>Monthly family income (high vs low)<br>Employment status (without work vs working)                                                       | Sleep satisfaction (composite, dichotomous)                                                        | Low educational level and family income are associated with sleep dissatisfaction               | Sleeping habits and health status attenuated the effect of income on sleep satisfaction                                                               |
| Rásky 1996      | Cross-sectional<br>8747 adults 20-59y from the general population in 79 rural communities of Styria, Austria     | Employment status (employed vs unemployed)                                                                                                                                  | Sleeping disorders (single question, yes vs no)                                                    | The unemployed individuals more often reported sleeping disorders than the employed individuals |                                                                                                                                                       |
| Breslau 1997    | Cross-sectional<br>973 adults 26-36y insured in a health maintenance organization in southeast Michigan          | Education (<high school, high school, some college, college)<br>Employment status (employed full-time vs employed part-time or unemployed)                                  | Daytime sleepiness (five items from the Sleep-Wake Activity Inventory)                             | Those employed full-time had more sleepiness than those employed part-time or not employed      |                                                                                                                                                       |
| Fabsitz 1997    | Cross-sectional<br>8438 men 33-51y, part of an established cohort of US veteran twin pairs                       | Employment status (full- or part-time vs. none)<br>Education                                                                                                                | Insomnia symptoms frequency (Jenkins Sleep Questionnaire, six levels)                              | Employment was related to reduced risk of insomnia symptoms                                     |                                                                                                                                                       |
| Rona 1997       | Cross-sectional<br>14674 children 5-11y from primary schools in England and Scotland                             | Paternal social class (non-manual, skilled manual, semi- and unskilled)<br>Maternal educational level (college or university, secondary education, primary or no education) | Parent-reported nocturnal enuresis (< 1 week vs $\geq 1$ week)                                     | Parental SES was not associated with nocturnal enuresis in children                             | Girls whose fathers' social class was non-manual or skilled manual had lower prevalence of nocturnal enuresis than boys from non-manual class fathers |
| Schechtman 1997 | Cross-sectional<br>485 adults >67y enrolled in three linked clinical studies in Seattle, Atlanta, and Farmington | Education (years)                                                                                                                                                           | Insomnia symptoms frequency (summary score)                                                        | Limited education predicted higher insomnia symptoms                                            |                                                                                                                                                       |
| Rona 1998       | Cross-sectional<br>14372 children 5-11y from primary schools in England and Scotland                             | Paternal social class (non-manual, skilled manual, semi- and unskilled)<br>Maternal educational level (college or university, secondary education, primary or no education) | Parent-reported sleep disturbance (single question, at least once a week vs less than once a week) | Children whose mothers had lower education were more likely to have disturbed sleep             |                                                                                                                                                       |
| Talvi 1998      | Cross-sectional<br>885 adults 21-55y working in two oil refineries in Finland                                    | Education (primary, intermediate, secondary school, vocational school, vocational institute, university)<br>Occupational status (administration, maintenance, production)   | Sleep disorders (single question assessing EDS, sleep latency, and insomnia)                       | Production workers had higher odds of poor sleep than administration workers                    |                                                                                                                                                       |

|               |                                                                                                                          |                                                                                                                     |                                                                                                                                           |                                                                                                                                                                        |                                                    |
|---------------|--------------------------------------------------------------------------------------------------------------------------|---------------------------------------------------------------------------------------------------------------------|-------------------------------------------------------------------------------------------------------------------------------------------|------------------------------------------------------------------------------------------------------------------------------------------------------------------------|----------------------------------------------------|
| Hall 1999     | Cross-sectional<br>462 women 41-52 y from the general population of 7 US communities                                     | Education (<12 y, 12-16 y, >16 y)<br>Annual income (< vs >\$35000)                                                  | Frequency of insomnia symptoms (at least once per week vs not at all in previous 2 weeks)<br>Subjective sleep quality (restless vs sound) | Lower income predicted poorer sleep quality                                                                                                                            | Self-reported chronic stress mediated the relation |
| Roberts 1999  | Cohort<br>2380 adults ≥50y part of a general population cohort in Alameda county, California followed for a year         | Education (<12 vs ≥12 years)<br>Financial strain (5 items about financial problems; no problems vs any problem)     | Incident insomnia and hypersomnia (single question, yes vs no)                                                                            | Education and financial strain were not associated with incident insomnia or hypersomnia                                                                               |                                                    |
| Adler 2000    | Cross-sectional<br>156 US white women 30-46 y recruited by advertisements                                                | Subjective SES (ladder ranking 1-10)                                                                                | Sleep quality and sleep-onset latency subscales of PSQI                                                                                   | Higher subjective SES was related to shorter sleep latency controlling for objective SES                                                                               |                                                    |
| Ito 2000      | Cross-sectional<br>518 adults 65y enrolled in a population-based health examination in N City, Japan                     | Educational attainment (less than high school vs high school or more)<br>Employment status (working vs not working) | Self-reported sleep latency (<30 min vs >30 min), awakenings at night (0-2 vs >2), and feeling rested in the morning (yes vs no)          | In men, difficulty falling asleep and frequent awakenings at night were significantly associated with retirement from work and low educational attainment respectively |                                                    |
| Phillips 2000 | Cross-sectional<br>1803 adults ≥18y from the general population of Kentucky                                              | Education<br>Income (< vs >\$25000/y)                                                                               | Frequency of restless legs symptoms (never, rarely, or sometimes vs often or very often)                                                  | Lower income level was associated with more frequent restless legs symptoms                                                                                            |                                                    |
| Sadeh 2000    | Cross-sectional<br>140 children in the 2 <sup>nd</sup> , 4 <sup>th</sup> , and 6 <sup>th</sup> grade in Tel Aviv, Israel | Parental education (average in years)                                                                               | 5-day actigraphy (sleep onset, time in bed, sleep efficiency, number of awakenings)                                                       | The parents' higher education level was associated with improved sleep quality (higher sleep percentage and less night wakings)                                        |                                                    |
| Gallant 2001  | Cohort<br>1266 adults ≥60 y from the general US population followed for three years                                      | Education (six levels)<br>Annual household income (ten levels)                                                      | Sleep duration (less than 6h or more than 9h, 6h or 9h, 7h or 8h)                                                                         | Greater income predicted better sleep habits in white women                                                                                                            |                                                    |
| Hublin 2001   | Cross-sectional<br>12423 twin adults 33-60y from the general population in Finland                                       | Education level (primary, secondary, or tertiary)<br>Working status (working vs not working)                        | Insufficient sleep (more than an hour difference between sleep need and actual sleep)                                                     | Working was associated with insufficient sleep than not working. Less education was associated with insufficient sleep only in men.                                    |                                                    |

|                   |                                                                                         |                                                                                                                                                                                                                                                                                                   |                                                                                                                                                                             |                                                                                                                                                                                                       |                                                                          |
|-------------------|-----------------------------------------------------------------------------------------|---------------------------------------------------------------------------------------------------------------------------------------------------------------------------------------------------------------------------------------------------------------------------------------------------|-----------------------------------------------------------------------------------------------------------------------------------------------------------------------------|-------------------------------------------------------------------------------------------------------------------------------------------------------------------------------------------------------|--------------------------------------------------------------------------|
| Ohida 2001        | Cross-sectional<br>31260 adults ≥20y from<br>the general population in<br>Japan         | Employment status (employed vs<br>unemployed)                                                                                                                                                                                                                                                     | Insufficient sleep<br>(insufficient/very<br>insufficient vs very<br>sufficient/sufficient)<br>Short sleep duration (fewer<br>than 5h/5-6h vs 6-7h/7-<br>8h/8-9h/9h or more) | Unemployed had lower odds for<br>insufficient and short sleep than<br>employed                                                                                                                        |                                                                          |
| Pallesen 2001     | Cross-sectional<br>2001 adults from the<br>general population in<br>Norway              | Composite measure of education and<br>income (below vs above mean)                                                                                                                                                                                                                                | Insomnia symptoms based<br>on DSM-IV criteria<br>(questionnaire)                                                                                                            | Low SES did not predict DSM-IV<br>insomnia diagnosis but predicted<br>greater sleep latency, more early<br>morning awakenings and less<br>dissatisfaction with current sleep                          |                                                                          |
| Sutton 2001       | Cross-sectional<br>10702 adults ≥15y from<br>the general population in<br>Canada        | Education (some secondary or less,<br>secondary graduation, some post-<br>secondary, post-secondary degree or<br>diploma)<br>Income adequacy (lowest, next to lowest,<br>middle, next to highest or highest)<br>Working status (not in the labor force,<br>usually work days, regular shift work) | Insomnia (single question,<br>yes vs no)                                                                                                                                    | Low socioeconomic status, reflected<br>by having some secondary education<br>or less, lowest income adequacy, and<br>not being in the labor force, was<br>associated with the presence<br>of insomnia |                                                                          |
| Åkerstedt<br>2002 | Cross-sectional<br>5231 adults 19-65y<br>employed in 40 companies<br>in central Sweden  | Occupational class (higher white collar,<br>lower white collar, blue collar)                                                                                                                                                                                                                      | Insomnia symptoms<br>frequency index                                                                                                                                        | Occupational class was not related to<br>insomnia symptoms                                                                                                                                            |                                                                          |
| Li 2002           | Cross-sectional<br>9851 adults 18-65y from<br>the general population in<br>Hong Kong    | Education level (tertiary or above,<br>secondary, primary/below)<br>Employment status (employed, student,<br>housewife, unemployed, retired)                                                                                                                                                      | Insomnia symptoms<br>(sometimes or always vs no<br>or seldom) at least three<br>times per week within the<br>last month                                                     | Housewives and unemployed had<br>higher odds of insomnia symptoms<br>than employed.                                                                                                                   | Low education was<br>associated with insomnia in<br>men but not in women |
| Moore 2002        | Cross-sectional<br>1139 adults from the<br>general population of 3<br>Michigan counties | Years of education<br>Annual income                                                                                                                                                                                                                                                               | Self-reported sleep quantity<br>(hours daily) and quality<br>(scale 1-5)                                                                                                    | Better sleep quality was significantly<br>associated with higher education and<br>income but not sleep quantity                                                                                       |                                                                          |
| Ohayon 2002       | Cross-sectional<br>3719 adults ≥15y from the<br>general population in<br>South Korea    | Education (never gone to school, less than<br>11 years school, 12 years school, non-<br>university diploma, university)<br>Employment status (daytime worker,<br>shift/night work, unemployed, not<br>working, student)                                                                           | Insomnia symptoms at least<br>three days per week                                                                                                                           | Having no or little education and<br>being a shift worker was associated<br>with complaints of non-restorative<br>sleep                                                                               |                                                                          |

|              |                                                                                                                                        |                                                                                                                                                                                                                                                                                                            |                                                                                                                      |                                                                                     |
|--------------|----------------------------------------------------------------------------------------------------------------------------------------|------------------------------------------------------------------------------------------------------------------------------------------------------------------------------------------------------------------------------------------------------------------------------------------------------------|----------------------------------------------------------------------------------------------------------------------|-------------------------------------------------------------------------------------|
| Rocha 2002   | Cross-sectional<br>1066 adults from the<br>general population in<br>Bambui, Brazil                                                     | Years of education (0, 1–3, 4–7, 8+)<br>Current employment situation (working,<br>not working, retired)                                                                                                                                                                                                    | Insomnia symptoms during<br>the last 30 days, at least<br>three times a week or more,<br>with any level of distress  | Insomnia was independently<br>associated with less education                        |
| Chervin 2003 | Cross-sectional<br>145 children of 2 <sup>nd</sup> and 5 <sup>th</sup><br>grade from 6 elementary<br>schools in Ypsilanti,<br>Michigan | Financial need (participation in the school<br>lunch assistance program)                                                                                                                                                                                                                                   | 22-item SDB subscale of<br>the Pediatric Sleep<br>Questionnaire (high risk<br>score $\geq 0.33$ )                    | SES showed no association with SDB<br>risk after controlling for BMI                |
| Doi 2003a    | Cross-sectional<br>4722 workers of a<br>telecommunications<br>company in Tokyo, Japan                                                  | Education (< or >high school)                                                                                                                                                                                                                                                                              | Excessive daytime<br>sleepiness (ESS score >10)                                                                      | EDS was not associated with<br>educational status                                   |
| Doi 2003b    | Cross-sectional<br>4868 workers of a<br>telecommunications<br>company in Tokyo, Japan                                                  | Education (< or >high school)                                                                                                                                                                                                                                                                              | Sleep quality (PSQI global<br>score >5)                                                                              | Lower education was associated with<br>poorer sleep quality                         |
| Kravitz 2003 | Cross-sectional<br>11222 women 40-55y<br>from the general<br>population of seven US<br>cities                                          | Educational level (<12th grade, 12th<br>grade or high school diploma or<br>equivalent, some college, college<br>graduate, graduate studies)<br>Current employment ( $\geq 35$ h/week,<br><35h/week, not employed)<br>Financial strain (paying for basic needs;<br>very hard, somewhat hard, not very hard) | Sleeping difficulty (single<br>question, yes vs no)                                                                  | Higher levels of educational<br>attainment were associated with sleep<br>difficulty |
| Larsson 2003 | Cross-sectional<br>4648 adults 20-69y from<br>the general population in<br>Norrbotten, Sweden                                          | Occupation (workers in service or<br>industry vs professionals, higher civil<br>servants, and self-employed)                                                                                                                                                                                               | Sleep apnea symptoms                                                                                                 | Higher occupational class was<br>associated with snoring                            |
| Hara 2004    | Cross-sectional<br>1066 adults from the<br>general population in<br>Bambui, Brazil                                                     | Years of education (0, 1–3, 4–7, 8+);<br>Monthly personal income (none, <1, 1.0–<br>1.9, $\geq 2.0$ Brazilian minimum wages);<br>Monthly family income<br>(<2.0, $\geq 2.0$ Brazilian minimum wages);<br>Current employment situation (student,<br>working, unemployed, retired)                           | Excessive daytime<br>sleepiness three or more<br>times per week with<br>consequent impairment<br>of daily activities | Lower family income was<br>associated with EDS                                      |
| Paine 2004   | Cross-sectional                                                                                                                        | Employment status (unemployed vs<br>employed)                                                                                                                                                                                                                                                              | Insomnia symptoms<br>(difficulty falling asleep,<br>frequency of nocturnal                                           | Being unemployed increased the risk<br>of reporting having difficulty falling       |

|              |                                                                                                        |                                                                                                                                                                                                                                          |                                                                                                                                                                                                          |                                                                                                                                                                                                                                                                                                                                       |                                                                    |
|--------------|--------------------------------------------------------------------------------------------------------|------------------------------------------------------------------------------------------------------------------------------------------------------------------------------------------------------------------------------------------|----------------------------------------------------------------------------------------------------------------------------------------------------------------------------------------------------------|---------------------------------------------------------------------------------------------------------------------------------------------------------------------------------------------------------------------------------------------------------------------------------------------------------------------------------------|--------------------------------------------------------------------|
|              | 2670 adults 20-59 y from the general population in New Zealand                                         |                                                                                                                                                                                                                                          | awakenings, difficulty getting back to sleep, waking too early, wake feeling refreshed)                                                                                                                  | asleep and waking 3 or more times during the night.                                                                                                                                                                                                                                                                                   |                                                                    |
| Roberts 2004 | Cross-sectional<br>5118 9 <sup>th</sup> grade adolescents from 13 high schools in 4 Texas counties     | Self-reported family's standard of living (very well off, living comfortably, just getting along, nearly poor or poor)                                                                                                                   | Insomnia symptoms based on DSM-IV criteria (questionnaire)                                                                                                                                               | Poor standard of living predicted insomnia diagnosis                                                                                                                                                                                                                                                                                  |                                                                    |
| Su 2004      | Cross-sectional<br>2045 adults ≥65y from the general population of Shi-Pai community in Taipei, Taiwan | Education (illiterate vs. non-illiterate)                                                                                                                                                                                                | Insomnia symptoms based on DSM-IV criteria                                                                                                                                                               | Lack of education was associated with insomnia symptoms                                                                                                                                                                                                                                                                               |                                                                    |
| Terzano 2004 | Cross-sectional<br>3284 adults enrolled by general practitioners in Italy                              | Education (senior high school or university vs elementary or junior high school)<br>Employment (yes vs no)                                                                                                                               | Insomnia symptoms three times or more per week                                                                                                                                                           | Unemployment and low education were risk factors for insomnia                                                                                                                                                                                                                                                                         |                                                                    |
| Acebo 2005   | Cross-sectional<br>169 children 1-5 y recruited by advertisements in Rhode Island                      | Hollingshead score (5 classes)                                                                                                                                                                                                           | Sleep diary (bed time, rise time, time in bed)<br>1-week actigraphy (sleep start time, sleep end time, sleep period time, sleep time, wake time, wake bouts, sleep efficiency, longest continuous sleep) | Children with a lower family SES rose later in the morning, spent longer times in bed, and had more nocturnal wake time, more wake bouts, shorter longest continuous sleep bouts and lower sleep efficiency. Children in families with lower SES had more nightly variability in bedtimes, sleep start times, and sleep period times. |                                                                    |
| Averina 2005 | Cross-sectional<br>3705 adults from the general population in Arkhangelsk, Russia                      | Education (secondary, secondary professional, high)<br>Occupation (high, average, low income, retirement pension)                                                                                                                        | Insomnia symptoms (single question, yes vs no)                                                                                                                                                           | Insomnia symptoms were more prevalent in occupations with low salary and pensioners vs high salary and in participants with lower vs middle education.                                                                                                                                                                                |                                                                    |
| Chen 2005    | Cross-sectional<br>39588 subjects ≥15 y from the general population in Taiwan                          | Annual income (very low, low, middle, high)<br>Education (elementary or lower, some high school, high school graduate, some college or higher)<br>Employment status (employed, unemployed, homemaker, student, retired/disability/other) | Insomnia self-assessment inventory score                                                                                                                                                                 | Higher education predicted higher insomnia score. Unemployed, retired/disability pensioners and homemakers had higher insomnia scores than the employed.                                                                                                                                                                              | In women lower education was associated with higher insomnia score |

|                          |                                                                                                                                 |                                                                                                                                                                                         |                                                                                                                                                                                                                                                                   |                                                                                                                                                                                                                    |
|--------------------------|---------------------------------------------------------------------------------------------------------------------------------|-----------------------------------------------------------------------------------------------------------------------------------------------------------------------------------------|-------------------------------------------------------------------------------------------------------------------------------------------------------------------------------------------------------------------------------------------------------------------|--------------------------------------------------------------------------------------------------------------------------------------------------------------------------------------------------------------------|
| Fass 2005                | Cross-sectional<br>15699 adults, part of nine existing US cohorts                                                               | Education (college or less)                                                                                                                                                             | Nocturnal gastroesophageal reflux (single question, two or more times per month)                                                                                                                                                                                  | College education was associated with less frequent heartburn during sleep                                                                                                                                         |
| Gander 2005              | Cross-sectional<br>5441 adults 30-60 y from the general population in New Zealand                                               | Eligibility for community services card (yes vs no)                                                                                                                                     | EDS (Epworth Sleepiness Scale score >10)                                                                                                                                                                                                                          | Eligibility for a community services card was not associated with EDS                                                                                                                                              |
| Gellis 2005              | Cross-sectional<br>575 adults from the general population in Shelby County, Tennessee                                           | Individual SES: years of education<br>Household SES: highest level of formal achievement attained by a member of the household                                                          | DSM-IV insomnia criteria assessed by 2-week sleep diary and impairment questionnaires (ESS score >7.4 or Fatigue Severity Scale score >5.5 or Beck Depression Inventory score >10 or State-Trait Anxiety Inventory score >37 or Insomnia Impact Scale score >125) | Higher individual and household SES subjects were less likely to suffer from insomnia                                                                                                                              |
| Hale 2005                | Cross-sectional<br>7095 adults 25-64y from the general US population                                                            | Educational status (<high school, high school graduate, college graduate, graduate school)<br>Employment status (no job, retired, work hours <36, work hours 36-50, work hours 50 plus) | Sleep duration (<6.5h, 6.5-8.5h, >8.5h)                                                                                                                                                                                                                           | Lower education was associated with both short and long sleep.<br>Unemployment and retirement were associated with long sleep                                                                                      |
| Hsu 2005                 | Cross-sectional<br>197 women 40-60y recruited from local activity centers of five communities in a small town in central Taiwan | Employment status (employed, unemployed)                                                                                                                                                | Sleep quality (PSQI global score >5)                                                                                                                                                                                                                              | Employment status was not related to sleep quality                                                                                                                                                                 |
| Kim 2005                 | Cross-sectional<br>2913 adults 35-65y part of a cohort of employees in 5 state agencies in Wisconsin                            | Education (some college or less, college graduate or higher)                                                                                                                            | Excessive daytime sleepiness (13-item questionnaire subjected to factor analysis)                                                                                                                                                                                 | Lower education was related to worse perceived sleepiness and sleep propensity in passive situations                                                                                                               |
| McLaughlin Crabtree 2005 | Cross-sectional<br>3371 children 2-7 y from public schools in Jefferson County, Kentucky                                        | Median annual income by zip-code residence (> or <\$41994)                                                                                                                              | Parent-reported sleep duration, bed time, rise time, and behaviors                                                                                                                                                                                                | Low SES children were more likely to have shorter sleep duration, problematic bedtime behaviour, and EDS.<br>Older children in the lower SES group reported to have more sleep behaviour problems than the younger |

|               |                                                                                         |                                                                                                                                                                                                                                |                                                                                                                                  |                                                                                                                                                                                                    |                                                                                                                                                                                                                              |
|---------------|-----------------------------------------------------------------------------------------|--------------------------------------------------------------------------------------------------------------------------------------------------------------------------------------------------------------------------------|----------------------------------------------------------------------------------------------------------------------------------|----------------------------------------------------------------------------------------------------------------------------------------------------------------------------------------------------|------------------------------------------------------------------------------------------------------------------------------------------------------------------------------------------------------------------------------|
|               |                                                                                         |                                                                                                                                                                                                                                | (bedtime behaviors and daytime sequelae)                                                                                         |                                                                                                                                                                                                    | children. Older African American females in the lower SES group were reported to obtain the least sleep, while older Caucasian males in the upper SES group were reported to obtain the most sleep.                          |
| Ohayon 2005   | Cross-sectional<br>1026 adults ≥60y from the general population in Paris, France        | Years of education (0, 1-7, 8-10, 11-12, >12)                                                                                                                                                                                  | Sleep duration (<4.5h, 4.5-6h, 6-8h, 8-9.5h, >9.5h)<br>Sleep latency (<30min, 30-80min, >80min)                                  | Lower education was associated with short sleep, long sleep, and greater sleep latency                                                                                                             |                                                                                                                                                                                                                              |
| Phillips 2005 | Cross-sectional<br>13563 adults 47-69 y from the general population of 4 US communities | Education (less than high school, high school completion, more than high school)<br>Annual income (<\$16000, \$16000-50000, >\$50000)                                                                                          | Maastricht Questionnaire insomnia symptoms (difficulty falling asleep, sleep continuity disturbance, nonrestorative sleep)       | Lower education and income were associated with more complaints of difficulty falling asleep and waking up repeatedly. Those with lower education were less likely to wake up feeling unrefreshed. |                                                                                                                                                                                                                              |
| Tjepkema 2005 | Cross-sectional<br>36984 adults ≥15y from the general population of Canada              | Education (less than secondary graduation, secondary graduation, some postsecondary, postsecondary graduation)<br>Household income (lowest, lower-middle, upper-middle, highest)<br>Employment status (employed vs unemployed) | Insomnia symptoms frequency (none of the time, a little of the time, or some of the time vs most of the time or all of the time) | Those with less education, lower income, and unemployed were more likely to report insomnia                                                                                                        | Adjusting for lifestyle factors (BMI, physical activity, drinking or drug use), shift work, life and work stress, chronic conditions, activity limitations, mood and anxiety disorders fully attenuated the effect of income |
| Twoorger 2005 | Cross-sectional<br>73 women 20-40y participating in an intervention study in Seattle    | Employment status (employed vs. unemployed)                                                                                                                                                                                    | 10-day actigraphy (sleep efficiency, WASO)<br>Sleep quality (PSQI global score >5)                                               | Unemployed women had higher sleep efficiency and less WASO than employed. Unemployed women reported worse sleep quality than employed                                                              |                                                                                                                                                                                                                              |
| Ursin 2005    | Cross-sectional<br>8860 adults 40-45y from the general population in                    | Education (none to 10 <sup>th</sup> grade vs high school to graduate university)<br>Family income (< vs >NOK 400000)                                                                                                           | Sleep duration                                                                                                                   | Men with high education levels slept longer than did men with low education levels. Women with high                                                                                                |                                                                                                                                                                                                                              |

|                 |                                                                                                    |                                                                                                                                                                                           |                                                                                                                       |                                                                                                                                                                                     |                                                                                                                                                                                                                                                          |
|-----------------|----------------------------------------------------------------------------------------------------|-------------------------------------------------------------------------------------------------------------------------------------------------------------------------------------------|-----------------------------------------------------------------------------------------------------------------------|-------------------------------------------------------------------------------------------------------------------------------------------------------------------------------------|----------------------------------------------------------------------------------------------------------------------------------------------------------------------------------------------------------------------------------------------------------|
|                 | Hordaland county, Norway                                                                           |                                                                                                                                                                                           |                                                                                                                       | family income slept less than did women with low incomes.                                                                                                                           |                                                                                                                                                                                                                                                          |
| BaHammam 2006   | Cross-sectional<br>1012 children 6-13y from elementary schools in Riyadh, Saudi Arabia             | Maternal education (less than high school vs high school or higher)<br>Maternal working status (yes vs no)                                                                                | Sleep duration                                                                                                        | Children whose mothers had high school education or higher had longer sleep duration compared to children whose mothers had lower educational level                                 |                                                                                                                                                                                                                                                          |
| Kronholm 2006   | Cross-sectional<br>7262 adults from the general population in Finland                              | Education (basic, secondary, higher)<br>Employment status (full-time, part-time, student, retired, unemployed, at home)                                                                   | Sleep duration deviation (from the mean sleep duration of the sample)                                                 | Unemployed and retired exhibited the highest deviation in sleep duration                                                                                                            |                                                                                                                                                                                                                                                          |
| Lauderdale 2006 | Cross-sectional<br>669 adults 38-50 y, part of an established general population cohort in Chicago | Education (less than high school, high school graduate, some college, college graduate, more than college)<br>Income (7 levels)<br>Employment status (full-time, part-time, not employed) | 3-day actigraphy (total time in bed, sleep latency, total sleep duration, and sleep efficiency)                       | Higher income was significantly associated with shorter sleep latency and greater sleep efficiency. Higher education was significantly associated with greater sleep efficiency.    | The effects of education, income, and employment status on sleep efficiency was significantly larger in Blacks comparing to Whites                                                                                                                       |
| Sekine 2006     | Cross-sectional<br>3556 adults (government civil servants) in Japan                                | Employment grade (highest, intermediate, lowest)                                                                                                                                          | Sleep quality (PSQI global score >5.5)                                                                                | Lowest-grade employees had poorer sleep quality compared to highest-grade                                                                                                           | The effect was attenuated and no longer significant when work (work hours, shift work, job control, demand, support) and family (domestic role, family-to-work and work-to-family conflict) characteristics and longstanding illnesses were adjusted for |
| Adam 2007       | Cross-sectional<br>2454 children and adolescents 5.5-19y members of a general population US cohort | Family income<br>Parental education (average parents' years of education)                                                                                                                 | Child- or parent-reported sleep duration                                                                              | Family income and parental education did not predict child's sleep duration                                                                                                         |                                                                                                                                                                                                                                                          |
| Friedman 2007   | Cross-sectional<br>94 women ≥55 y recruited from a prior longitudinal study in Wisconsin           | Household income<br>Years of education                                                                                                                                                    | NightCap sleep recordings at home for 4 nights (sleep latency, sleep efficiency)<br>Sleep quality (PSQI global score) | Greater income and more years of education significantly predicted reduced sleep latency and greater sleep efficiency. Greater income significantly predicted better sleep quality. | Health indicators (self-rated health, recent and chronic illnesses) and psychological characteristics (depression, neuroticism) attenuated the associations between                                                                                      |



|                 |                                                                                                           |                                                                                                                           |                                                                                                                                  |                                                                                                                                                                               |                                                                                                                                                                                  |
|-----------------|-----------------------------------------------------------------------------------------------------------|---------------------------------------------------------------------------------------------------------------------------|----------------------------------------------------------------------------------------------------------------------------------|-------------------------------------------------------------------------------------------------------------------------------------------------------------------------------|----------------------------------------------------------------------------------------------------------------------------------------------------------------------------------|
|                 |                                                                                                           |                                                                                                                           |                                                                                                                                  |                                                                                                                                                                               | education and sleep efficiency and between income and sleep quality                                                                                                              |
| Ozden 2007      | Cross-sectional<br>1339 children 6-12y from primary schools in Ankara, Turkey                             | Parental education (primary school or less vs junior high school or more)                                                 | Parent-reported nocturnal enuresis                                                                                               | Lower parental education was associated with presence of nocturnal enuresis in children                                                                                       |                                                                                                                                                                                  |
| Rangarajan 2007 | Cross-sectional<br>1266 adults from the general population in Bangalore, India                            | Education (below high school vs high school and above)<br>Monthly per-capita income (2 cut-offs: US\$2/day and US\$1/day) | NIH/IRLSSG criteria for diagnosis of RLS (questionnaire)                                                                         | RLS was associated with per-capita income less than US\$1/day and education less than high school level                                                                       |                                                                                                                                                                                  |
| Stamatakis 2007 | Cohort<br>6928 adults 16-94 y from the general population of Alameda county, California followed for 34 y | Household income (grouped in quintiles)<br>Education (<12 y, 12 y, >12 y)                                                 | Self-reported sleep duration (<7 h vs 7-8)                                                                                       | The relative odds of short sleep were greater among those in the lower two income quintiles and in those with less than high school education                                 | The increased odds of short sleep associated with low income was substantially reduced after adjusting for living conditions (marital status, home ownership, household density) |
| Baigi 2008      | Cross-sectional<br>12166 adults 18-84y from the general population of Sweden                              | Social security recipiency                                                                                                | Sleep disturbances (single question, yes vs no)                                                                                  | Social security recipients experienced more sleep disturbances                                                                                                                | Adjusting for lifestyle habits, psychological and physiological symptoms partially attenuated the relationship                                                                   |
| Blay 2008       | Cross-sectional<br>6961 adults ≥60y from the general population in Rio Grande do Sul, Brazil              | Income (< vs ≥US\$200/month)<br>Years of education (0-3 vs ≥4)                                                            | Sleep disturbance (single question, yes vs no)                                                                                   | Low income and education were independent risk factors for self-reported sleep disturbance                                                                                    |                                                                                                                                                                                  |
| Ekici 2008      | Cross-sectional<br>9187 parents and grandparents of primary school children in Kirikkale, Turkey          | Education (4 levels)<br>Income (>\$200 monthly; <\$200 monthly)                                                           | Snoring intensity (5-point scale)<br>Observed apnea frequency, daytime sleepiness, frequent awakenings (5-point frequency scale) | Lower education was associated with higher frequency of observed apnea, daytime sleepiness, and awakenings. Higher income was associated with higher frequency of awakenings. |                                                                                                                                                                                  |
| Inan 2008       | Cross-sectional<br>1626 children 7-11y from primary schools in Edirne, Turkey                             | Maternal education (low vs high)<br>Maternal employment status (working vs not working)                                   | Child- or parent-reported nocturnal enuresis at least two nights a week                                                          | Low educational level of mother increased the odds of nocturnal enuresis in the child                                                                                         |                                                                                                                                                                                  |
| Jean-Louis 2008 | Cross-sectional                                                                                           | Years of education<br>Income                                                                                              | Insomnia symptoms (Comprehensive                                                                                                 | Lower income was associated with insomnia symptoms                                                                                                                            |                                                                                                                                                                                  |

|               |                                                                                                                |                                                                                                        |                                                                                                                                                                                                               |                                                                                                                                                                             |                                                                                                                                                                                                                                                                              |
|---------------|----------------------------------------------------------------------------------------------------------------|--------------------------------------------------------------------------------------------------------|---------------------------------------------------------------------------------------------------------------------------------------------------------------------------------------------------------------|-----------------------------------------------------------------------------------------------------------------------------------------------------------------------------|------------------------------------------------------------------------------------------------------------------------------------------------------------------------------------------------------------------------------------------------------------------------------|
|               | 1394 women >50 y from the general population in New York                                                       |                                                                                                        | Assessment and Referral Evaluation sleep subscale)                                                                                                                                                            |                                                                                                                                                                             |                                                                                                                                                                                                                                                                              |
| Kuehni 2008   | Cross-sectional<br>6811 White and South Asian children 1-4 y from the general population of Leicestershire, UK | Paternal and maternal education (completed full-time education at ≤16 y vs older)                      | Parent-reported habitual snoring (almost always vs never/only with colds/sometimes apart from colds)                                                                                                          | Habitual snoring was associated with low parental education                                                                                                                 | Environmental factors (maternal smoking during pregnancy, current parental smoking, electrical cooking, central heating, exposure to road traffic, household pets, number of siblings, nursery care, and breastfeeding >6 months) mediated the effect of parental education. |
| Li 2008       | Retrospective cohort<br>12938 adults >35 y hospitalized for OSA from 1997 to 2001 in Sweden                    | Education (<10 y, 10-12 y, >12 y)                                                                      | OSA (ICD-10 code G47.3)                                                                                                                                                                                       | Increased risk for OSA was observed in men with middle educational level, while those of high educational level had a decreased risk. No association was observed in women. |                                                                                                                                                                                                                                                                              |
| Mezick 2008   | Cross-sectional<br>187 adults 45-75 y part of a larger cohort in Pittsburgh metropolitan area                  | Composite SES score (education and annual income)                                                      | 2-night home PSG (sleep duration, sleep latency, sleep efficiency, WASO, sleep architecture, AHI)<br>10-day actigraphy (sleep duration, sleep latency, sleep efficiency)<br>Sleep quality (PSQI)<br>EDS (ESS) | Lower SES was associated with longer actigraphy-measured latency, more WASO, and poorer sleep quality on PSQI                                                               | Environmental factors (outside noise, room temperature and health worries) and negative affect were statistical mediators of the relationship between SES and PSQI scores                                                                                                    |
| Roberts 2008  | Cohort<br>4175 adolescents 11-17y from the general population of Houston followed for a year                   | Family income (less than \$35,000, \$35,000 to 64,999, \$65,000 and above)                             | DSM-IV insomnia criteria                                                                                                                                                                                      | Family income was not associated with incident insomnia                                                                                                                     |                                                                                                                                                                                                                                                                              |
| Virtanen 2008 | Cohort<br>10100 adults 20-54y from the general population in Finland followed for 5y                           | Employment status trajectory (stable, upward, unstable, downward, chronic unemployment)                | Sleep duration                                                                                                                                                                                                | Upward trajectory had increased sleep duration. Downward trajectory and chronic unemployment had decreased sleep duration                                                   |                                                                                                                                                                                                                                                                              |
| Xiang 2008    | Cross-sectional                                                                                                | Education level (college or above, senior high school, junior high school, primary school, illiterate) | Insomnia symptoms lasting 2 weeks or longer in the past 12 months                                                                                                                                             | Being illiterate was associated with lower odds of difficulties maintaining                                                                                                 |                                                                                                                                                                                                                                                                              |

|            |                                                                                                                |                                                                                                                                                                                                                                                                                                                                                  |                                                                                                                           |                                                                                                                   |                                                                                                                                                                                                                  |
|------------|----------------------------------------------------------------------------------------------------------------|--------------------------------------------------------------------------------------------------------------------------------------------------------------------------------------------------------------------------------------------------------------------------------------------------------------------------------------------------|---------------------------------------------------------------------------------------------------------------------------|-------------------------------------------------------------------------------------------------------------------|------------------------------------------------------------------------------------------------------------------------------------------------------------------------------------------------------------------|
|            | 5926 subjects $\geq 15$ y from the general population in Beijing, China                                        | Employment status (employed vs unemployed)                                                                                                                                                                                                                                                                                                       |                                                                                                                           | sleep and early morning awakenings in the urban sample                                                            |                                                                                                                                                                                                                  |
| Yao 2008   | Cross-sectional<br>187 adults $\geq 65$ y from the general population of a suburban district in Taipei, Taiwan | Education (no formal education, elementary, junior high, senior high, college and above)                                                                                                                                                                                                                                                         | Sleep quality (PSQI global score $> 5$ )                                                                                  | Those with college education and above had significantly poorer sleep quality than those with no formal education |                                                                                                                                                                                                                  |
| Arber 2009 | Cross-sectional<br>8578 subjects 16-74 y from the general British population                                   | Educational qualifications (degree or higher, professional and A levels, lower, no)<br>Employment status (full-time, part-time, unemployed, economically inactive)<br>Housing tenure (owns accommodation, rents from public housing, rents from other sources)<br>Household income (5 levels)                                                    | Insomnia symptoms (4 nights or more vs less often) assessed from a single question in Clinical Interview Schedule-Revised | Individuals with disadvantaged SES report more sleep problems than those living in more advantaged circumstances  | Smoking, worries and self-reported health variables (depression, self-rated health, number of chronic illnesses) attenuated the relationship between sleep problems and all measures of SES except for education |
| Baker 2009 | Cross-sectional<br>959 women 18-64y from the general US population                                             | Employment status (working full-time, working more than one job, working part-time, student, homemaker, unemployed, retired, or disabled)<br>Education (high school or less, graduated from high school, some vocational or college courses, graduated from college)<br>Household income ( $< \$35,000$ , $\$35,000 - \$75,000$ , $> \$75,000$ ) | Sleep quality (single question, dichotomous)<br>Daytime sleepiness (single question, dichotomous)                         | Being disabled and having lower education was associated with more daytime sleepiness                             |                                                                                                                                                                                                                  |
| Cho 2009   | Cross-sectional<br>5000 adults 20-59y from the general population of Korea                                     | Occupation (agriculture/fishery/forestry, self-employed, blue collar, white collar, housewife, student, unemployed/other)<br>Monthly income (Korean won $< 1,500,000$ , $1,500,000 - 3,000,000$ , $3,000,001 - 4,500,000$ , $> 4,500,000$ )                                                                                                      | Insomnia symptoms (difficulty initiating or maintaining sleep, yes vs no)                                                 | Lower income was associated with higher odds of insomnia symptoms                                                 |                                                                                                                                                                                                                  |
| Hall 2009  | Cross-sectional<br>368 midlife women from the general population of 4 US cities                                | Educational attainment (college or advanced degree vs without)<br>Financial strain (somewhat to very difficult paying for basics vs not difficult at all)                                                                                                                                                                                        | Subjective sleep quality (PSQI)<br>3-night home PSG assessing sleep duration and continuity (latency, WASO, efficiency)   | Financial strain was a significant correlate of poorer subjective sleep quality and PSG-assessed sleep continuity |                                                                                                                                                                                                                  |

|                |                                                                                                     |                                                                                                                                                                                                                                                                                                                     |                                                                                                                                          |                                                                                                                                                                                                                         |                                                                                                                                                                                                                                                                                                               |
|----------------|-----------------------------------------------------------------------------------------------------|---------------------------------------------------------------------------------------------------------------------------------------------------------------------------------------------------------------------------------------------------------------------------------------------------------------------|------------------------------------------------------------------------------------------------------------------------------------------|-------------------------------------------------------------------------------------------------------------------------------------------------------------------------------------------------------------------------|---------------------------------------------------------------------------------------------------------------------------------------------------------------------------------------------------------------------------------------------------------------------------------------------------------------|
| Jiang 2009     | Cross-sectional<br>1311 children 3-4y from kindergartens in Shanghai, China                         | Parent's education level (< vs ≥high school)<br>Household income (≥ vs <3000 yuan/month)                                                                                                                                                                                                                            | Parent-reported sleep duration                                                                                                           | Children whose mothers had higher education levels slept less                                                                                                                                                           |                                                                                                                                                                                                                                                                                                               |
| Joo 2009       | Cross-sectional<br>4405 adults 40-69y from the general population of Ansan, Korea                   | Education (<10 years, 10-14 years, ≥15 years)<br>Income (<1000, 1001-2000, 2001-4000, >4000 Won/month)                                                                                                                                                                                                              | EDS (ESS score >10)                                                                                                                      | A higher level of education was inversely associated with the risk of EDS.                                                                                                                                              |                                                                                                                                                                                                                                                                                                               |
| Kim 2009       | Cohort<br>1204 adults ≥65y from the general population in Kwangju, South Korea followed for 2y      | Education (no vs yes)<br>Housing (owned vs rented)<br>Past occupation (manual vs non-manual)<br>Current employment (yes vs no)                                                                                                                                                                                      | Prevalence, incidence, and persistence of insomnia symptoms (difficulty in initiation or maintenance of sleep 3 nights or more per week) | Incident insomnia was independently associated with previous manual occupation                                                                                                                                          |                                                                                                                                                                                                                                                                                                               |
| Krueger 2009   | Cross-sectional<br>110441 adults from the general US population                                     | Hours worked per week (>40, 35-40, <35, not working)<br>Education (less than a high school degree, a high school degree, some college but less than a 4-year degree, a 4-year degree or more)<br>Family income<br>Income portfolio (ranged from 0 to 6 and measured the number of income sources per family member) | Self-reported sleep duration (<6, 6, 7, 8, >8 h)                                                                                         | Those who are not working have increased odds of both short and long sleep. High levels of education or income or additional sources of income per family member are associated with lower odds of short or long sleep. | After adjustment for health behaviors (physical activity, smoking status, alcohol consumption) and self-reported health status (cardiovascular disease, acute or chronic respiratory condition, diabetes, pain, depression, anxiety, BMI, functional limitations) the relationships were partially attenuated |
| Reddy 2009     | Cross-sectional<br>360 adults 30-65 y from the general population in South Delhi, India             | Kuppuswami socioeconomic status score                                                                                                                                                                                                                                                                               | OSA (AHI ≥5 in PSG)                                                                                                                      | Prevalence of OSA was not significantly different across the socio-economic strata                                                                                                                                      |                                                                                                                                                                                                                                                                                                               |
| Sivertsen 2009 | Cross-sectional<br>47700 adults 20-89y from the general population of Nord-Trøndelag County, Norway | Educational level (primary, secondary, or college/university)                                                                                                                                                                                                                                                       | Insomnia symptoms (difficulties initiating or maintaining sleep, never/occasionally vs often/almost every night)                         | Insomnia was more frequent among less educated participants than those with college or university degrees                                                                                                               |                                                                                                                                                                                                                                                                                                               |
| Vincent 2009   | Cross-sectional<br>5877 adults 15-54y from the general US population                                | Employment status (student, working, homemaker, other)                                                                                                                                                                                                                                                              | Sleep duration (<7h, 7-8h, >8h)                                                                                                          | Long sleep was associated with being unemployed                                                                                                                                                                         |                                                                                                                                                                                                                                                                                                               |

|                      |                                                                                            |                                                                                                                                                                                                                                                        |                                                                                                                           |                                                                                                                                                                                                                                                                  |                                                                                                                                                                                                                                     |
|----------------------|--------------------------------------------------------------------------------------------|--------------------------------------------------------------------------------------------------------------------------------------------------------------------------------------------------------------------------------------------------------|---------------------------------------------------------------------------------------------------------------------------|------------------------------------------------------------------------------------------------------------------------------------------------------------------------------------------------------------------------------------------------------------------|-------------------------------------------------------------------------------------------------------------------------------------------------------------------------------------------------------------------------------------|
| Yang 2009            | Cross-sectional<br>1058 children 6-12y from primary schools in Liaocheng city, China       | Highest parental education (primary school, high school and tertiary education)                                                                                                                                                                        | Parent-reported sleep behaviour (sleep delays, enuresis at night, fear of sleeping alone or darkness)                     | Higher parental education was associated with more sleep behaviour problems                                                                                                                                                                                      |                                                                                                                                                                                                                                     |
| Fritsch Montero 2010 | Cross-sectional<br>3867 adults 18-64y from the general population of Gran Santiago, Chile  | Schooling (upper, middle, basic, none)<br>Employment status (10 levels)<br>Per capita income (in quartiles)<br>Income decrease (yes vs no)<br>Type of home (6 levels)                                                                                  | Revised Clinical Interview<br>Schedule sleep score >1                                                                     | Unemployed, housewives and occasional workers had higher odds of sleep problems than employed. Poorer house condition was associated with more sleep problems.                                                                                                   |                                                                                                                                                                                                                                     |
| Goodin 2010          | Cross-sectional<br>149 college students 18-45 y from a single mid-Atlantic university      | MacArthur Scale of Subjective Social Status                                                                                                                                                                                                            | Sleep quality (PSQI global score)                                                                                         | There was no association between perceived social status and sleep quality                                                                                                                                                                                       | Perceived social status was negatively associated with sleep quality for Asian and African Americans but not for Caucasian Americans                                                                                                |
| Grandner 2010        | Cross-sectional<br>159856 adults from the general US population                            | Education (less than high school, high school graduate, some college, college graduate)<br>Income level (8 levels)<br>Employment status (employed, self-employed, retired, student, homemaker, unemployed <1 year, unemployed >1 year, unable to work) | Frequency of sleep complaints (trouble falling asleep or staying asleep or sleeping too much) >5 days in the last 2 weeks | Socioeconomically disadvantaged have higher likelihood of sleep complaints                                                                                                                                                                                       | Racial/ethnic differences show relationships with lower income and educational attainment in Hispanic/Latino men and women respectively, employment status in African American men, and educational attainment in Asian/Other women |
| Gu 2010              | Cross-sectional<br>15638 adults >65 y from the general population of 22 provinces in China | Education (1+ years of schooling vs 0)<br>Self-reported family economic condition (good vs poor, as compared to other families)<br>Access to healthcare when in need (yes vs no)                                                                       | Sleep quality (single question, good/very good vs other)<br>Sleep duration (<6, 6, 7, 8, 9, >9 h)                         | Good family economic status and adequate access to healthcare increased the odds of reporting good sleep quality and decreased the odds of reporting ≤ 6 h of daily sleep.                                                                                       |                                                                                                                                                                                                                                     |
| Knutson 2010         | Cross-sectional<br>61027 adults from the general US population                             | Education (< 12th grade, high school graduate, some college, college degree or higher)<br>Income (divided into quartiles)<br>Employment status (full-time worker, part-time worker, student, retired/homemaker, unemployed)                            | Sleep duration <6h                                                                                                        | Those with some college education were significantly more likely to be short sleepers than those with college degree. Part-time workers, students, retired/homemakers and unemployed were significantly less likely to be short sleepers than full-time workers. |                                                                                                                                                                                                                                     |

|                 |                                                                                                                                        |                                                                                                                                                                                                                                          |                                                                                                                                                            |                                                                                                                                                                                                    |                                                                                                               |
|-----------------|----------------------------------------------------------------------------------------------------------------------------------------|------------------------------------------------------------------------------------------------------------------------------------------------------------------------------------------------------------------------------------------|------------------------------------------------------------------------------------------------------------------------------------------------------------|----------------------------------------------------------------------------------------------------------------------------------------------------------------------------------------------------|---------------------------------------------------------------------------------------------------------------|
| Lallukka 2010   | Cross-sectional<br>7957 adults 40-60 y recruited from the staff of the City of Helsinki, Finland                                       | Past SES (parental education, childhood economic difficulties)<br>Present SES (own education, occupational class, household income, housing tenure, current economic difficulties)                                                       | 4 insomnia items from the Jenkins Sleep Questionnaire (complaints of insomnia at least once a week during the previous month were used as a cut-off point) | Childhood and current economic difficulties showed associations with complaints of insomnia among both women and men. Not owing a house was associated with complaints of insomnia only among men. | The association between insomnia and childhood economic difficulties or housing tenure was stronger among men |
| Li S 2010       | Cross-sectional<br>20152 children 5-12 y from 55 elementary schools in 8 Chinese cities                                                | Parental educational levels (middle school or under, high school, college or above)<br>Household income (< 800, 800-2500, ≥ 2500 RMB/person/month)                                                                                       | Parent-reported habitual snoring (almost always/frequently vs occasionally/never in a single question from the Children's Sleep Habits Questionnaire)      | Lower family income and lower father's educational level were independent predictors of habitual snoring                                                                                           |                                                                                                               |
| Li SX 2010      | Cross-sectional<br>8558 parents of primary school children in Hong Kong                                                                | Employment status (employed vs unemployed)<br>Education level (≤primary school, secondary school, ≥tertiary school)<br>Housing type (private, public, semi-public/other)<br>Monthly family income (HK\$ ≤10,000, 10,001-20,000, ≥20,001) | Nightmare frequency (none/seldom, 1-2 times/month, 1-2 times/week, >2 times/week)                                                                          | Low monthly family income was significantly associated with nightmare frequency                                                                                                                    |                                                                                                               |
| Meltzer 2010    | Cross-sectional<br>154957 children and adolescents visiting 32 pediatric practices affiliated with a tertiary hospital in Philadelphia | Median household income according to residence zip code (in quartiles)                                                                                                                                                                   | Sleep disorders (ICD-9 codes in medical records)                                                                                                           | Higher income quartile was associated with less frequent diagnosis of sleep disorders in preschool- and school-aged children and adolescents                                                       |                                                                                                               |
| Mittelmark 2010 | Cross-sectional<br>4916 women 15-49y from the general population of Ghana                                                              | Education (secondary or higher, primary, no education)<br>Literacy (can vs cannot read)<br>Assets (ownership of consumer items and dwelling characteristics, in quintiles)                                                               | Hours of rest per day (<7 vs ≥7)                                                                                                                           | Lower education but higher wealth index predicted rest deprivation                                                                                                                                 |                                                                                                               |
| Nomura 2010     | Cross-sectional<br>1007 and 785 adults from the general population of South Korea and Taiwan respectively                              | Educational level (<12, 12-15, >15 years)<br>Self-rated household income (low, intermediate, high)                                                                                                                                       | Insomnia symptoms (difficulty initiating sleep, difficulty maintaining sleep, early morning waking) on a regular, nightly basis for more than two weeks    | Low household income was significantly associated with insomnia symptoms in South Korea, but not in Taiwan                                                                                         |                                                                                                               |

|                      |                                                                                                 |                                                                                                                                                                                                                                                    |                                                                                                                                             |                                                                                                                                                                                                                                                |                                                                                                                                                                                                                                                                                                                   |
|----------------------|-------------------------------------------------------------------------------------------------|----------------------------------------------------------------------------------------------------------------------------------------------------------------------------------------------------------------------------------------------------|---------------------------------------------------------------------------------------------------------------------------------------------|------------------------------------------------------------------------------------------------------------------------------------------------------------------------------------------------------------------------------------------------|-------------------------------------------------------------------------------------------------------------------------------------------------------------------------------------------------------------------------------------------------------------------------------------------------------------------|
| Paparrigopoulos 2010 | Cross-sectional<br>1005 adults from the general population in Greece                            | Educational level (high, middle, low)<br>Social class (ESOMAR 1997 index categorised as upper/upper middle, lower middle, lower)                                                                                                                   | Athens Insomnia Scale score $\geq 6$                                                                                                        | Participants of lower social class and education were more likely to suffer from insomnia                                                                                                                                                      |                                                                                                                                                                                                                                                                                                                   |
| Park 2010            | Cross-sectional<br>6510 adults 18-64y from the general population in Korea                      | Education (less than middle school, middle school degree, high school degree, college degree or higher)<br>Employment status (full-time, part-time, unemployed)                                                                                    | Sleep duration (5 h or less, 6, 7, 8, and 9 h or more)                                                                                      | A high level of education was associated with lower odds of sleeping for 5 h or less or for 8 h or more. Compared with subjects who had full-time jobs, unemployed subjects had higher odds of sleeping for either 5 h or less or 8 h or more. |                                                                                                                                                                                                                                                                                                                   |
| Patel 2010           | Cross-sectional<br>9714 adults from the general population of 5 counties in Pennsylvania        | Income status (above vs below the poverty threshold)<br>Education (less than high school graduate, high school graduate, some college, college graduate, post-college level)<br>Employment status (employed, unemployed, disabled, retired, other) | Sleep quality (single question, range 1-5, cut-off 2)                                                                                       | Poverty, low education and unemployment/disability was associated with poorer sleep quality                                                                                                                                                    | The effect of income on sleep quality was larger in Whites than African-Americans, Latinos, and other races. Health indicators and lifestyle habits (self-reported health status, BMI, smoking, heavy alcohol use, diagnosis of mental illness, stress levels) attenuated the effect of unemployment and poverty. |
| Tomfohr 2010         | Cross-sectional<br>128 adults 18-52 y recruited through advertisements in San Diego, California | Childhood SES: highest level of education attained by each parent (low if neither parent achieved education beyond high school, and high if either parent achieved some education beyond high school)                                              | Sleep quality (PSQI)<br>EDS (ESS)<br>PSG (sleep duration, latency, efficiency, architecture, WASO)                                          | Individuals with lower childhood SES spent more time in Stage 2 sleep and less time in SWS than participants from higher childhood SES backgrounds independently of current SES                                                                | Women from low childhood SES backgrounds had longer sleep latency than women from the high childhood SES group                                                                                                                                                                                                    |
| Tufik 2010           | Cross-sectional<br>1042 adults 20-80 y from the general population in Sao Paulo, Brazil         | Annual household income (high, mid, low according to the Brazilian Economic Classification Criteria)<br>Employment status (working vs not working)                                                                                                 | OSA ICSD-2 criteria (AHI from PSG, items 2 and 5 from Berlin Questionnaire, ESS $>10$ and/or item 8 from PSQI, Chalder Fatigue Scale $>4$ ) | SES was not associated with OSA                                                                                                                                                                                                                | Low income was a protective factor for males, but an associated factor for females                                                                                                                                                                                                                                |
| Amra 2011            | Cross-sectional                                                                                 | Education (junior high school or less, senior high school, university)                                                                                                                                                                             | OSA high risk (Berlin Questionnaire)                                                                                                        | No association between education and OSA risk                                                                                                                                                                                                  |                                                                                                                                                                                                                                                                                                                   |

|              |                                                                                                                  |                                                                                                                                                                                                                                                                                             |                                                                                                            |                                                                                                                                          |
|--------------|------------------------------------------------------------------------------------------------------------------|---------------------------------------------------------------------------------------------------------------------------------------------------------------------------------------------------------------------------------------------------------------------------------------------|------------------------------------------------------------------------------------------------------------|------------------------------------------------------------------------------------------------------------------------------------------|
|              | 3529 adults 18-70y from the general population of Isfahan, Iran                                                  |                                                                                                                                                                                                                                                                                             |                                                                                                            |                                                                                                                                          |
| Arakane 2011 | Cross-sectional<br>340 women 40-59y visiting inpatients at wards of an obstetrics hospital in Guayaquil, Ecuador | Years of education (<12 vs ≥12)                                                                                                                                                                                                                                                             | Insomnia (Insomnia Severity Index score)                                                                   | There was no association between education and insomnia                                                                                  |
| Arman 2011   | Cross-sectional<br>2669 children from the general population in Istanbul, Turkey                                 | SES index (occupation and educational level of parents, house ownership, number of rooms in the house, presence of various electrical devices in the house, land value of the house determined according to its location in the city, car ownership)                                        | Parent-reported bedtime, morning waking time and total sleep duration (combining nighttime sleep and naps) | Total sleep duration decreased significantly for both boys and girls with higher SES                                                     |
| Bonuck 2011  | Cohort<br>14049 children assessed at 1.5, 4.75 and 6.75 y from the general population in Avon, England           | Housing inadequacy (yes vs no)<br>Paternal social class (manual vs. professional)<br>Maternal education (low vs high)                                                                                                                                                                       | Parent-reported mouth-breathing, apnea, snoring (composite score)                                          | Lower SES was associated with increased risk for SDB symptoms                                                                            |
| Eder 2011    | Cross-sectional<br>1000 subjects >15 y from the general population in Sweden                                     | Educational attainment (primary, secondary, tertiary level)                                                                                                                                                                                                                                 | Telephone interview (short sleep <6 h, long sleep >8 h, sleep quality, EDS, insomnia symptoms)             | Non-college educated respondents were more likely to sleep < 6 or > 8 h per night and experience EDS than people with college educations |
| Hense 2011   | Cross-sectional<br>8542 children 2-9y from primary schools and preschools in 8 European countries                | Parental education (ISCED levels 0, 1, and 2 indicating low education; 3 and 4 indicating medium education, and ≥5 indicating high education)                                                                                                                                               | Parent-reported sleep duration                                                                             | Parental education level showed no association with sleep duration                                                                       |
| Li 2011      | Cross-sectional<br>6359 children 5-15y from primary schools in Hong Kong                                         | Parental employment status (employed vs unemployed)<br>Parental education level (≤primary school, secondary school, ≥college degree)<br>Housing type and area (private, public, other; ≤400, 401-600, >600 m <sup>2</sup> )<br>Monthly family income (HK\$ ≤10,000, 10,001-15,000, ≥15,001) | Parent-reported nightmare frequency (never, <1x/month, 1-2x/month, ≥1x/week)                               | Lower family income was significantly associated with more frequent nightmares                                                           |



|               |                                                                                                                                                                            |                                                                                                                                                                                                                                               |                                                                                                                                                                                     |                                                                                                                 |                                                                                                                                                                                                             |
|---------------|----------------------------------------------------------------------------------------------------------------------------------------------------------------------------|-----------------------------------------------------------------------------------------------------------------------------------------------------------------------------------------------------------------------------------------------|-------------------------------------------------------------------------------------------------------------------------------------------------------------------------------------|-----------------------------------------------------------------------------------------------------------------|-------------------------------------------------------------------------------------------------------------------------------------------------------------------------------------------------------------|
| McHale 2011   | Cross-sectional<br>469 Mexican American 7 <sup>th</sup> grade adolescents and their older sibling recruited from schools in and around a southwestern US metropolitan area | Family economic hardship (composite score of 17-item questionnaire measuring inability to make ends meet, not having enough money for necessities, economic adjustments or cutbacks, financial strain)<br>Parental education<br>Family income | Self-reported sleep duration                                                                                                                                                        | Higher parental education and family income was associated with shorter sleep duration                          |                                                                                                                                                                                                             |
| Moore 2011    | Cross-sectional<br>247 adolescents 13-16 y recruited from an established cohort in Cleveland                                                                               | Parent education (5 levels)<br>Parent income (8 levels)                                                                                                                                                                                       | 1-week actigraphy (sleep duration and coefficient of variation)                                                                                                                     | Family SES was not associated with sleep duration or variability                                                |                                                                                                                                                                                                             |
| Pallesen 2011 | Cross-sectional<br>1279 11 <sup>th</sup> -13 <sup>th</sup> grade adolescents from high schools in Hordaland county, Norway                                                 | Parental education (primary school, vocational/high school, college/university)                                                                                                                                                               | Behaviorally induced insufficient sleep syndrome (excessive daytime sleepiness, short habitual sleep duration and sleeping considerably longer than usual during weekend/vacations) | Higher level of maternal education was negatively related to BIISS                                              |                                                                                                                                                                                                             |
| Pigeon 2011   | Cross-sectional<br>92 adults >40 y recruited in a family medicine practice in Rochester                                                                                    | Employment status (employed vs unemployed)<br>Annual household income (<\$20,000 vs >\$20,000)<br>Education level (no high school diploma, high school diploma, college degree)                                                               | Sleep quality (PSQI global score >6)                                                                                                                                                | Lower education was associated with poorer sleep quality                                                        | After adjusting for depression and chronic health conditions the effects were attenuated                                                                                                                    |
| Ryu 2011      | Cross-sectional<br>4411 adults from the general population of 5 districts in Gwangju, Korea                                                                                | Educational background (uneducated, elementary school, middle school, high school, university or higher)<br>Average monthly family income (4 levels)<br>Job status (unemployed, daytime work, work other than daytime)                        | Self-reported sleep duration (<7, 7-8, >8)                                                                                                                                          | Short sleep was associated with working other than daytime and long sleep with lower education and unemployment | Health behaviors (physical activity, smoking, alcohol consumption) and conditions (BMI, pain/discomfort, depression/anxiety, cardiovascular disease, subjective health) attenuated the effects of education |
| Wong 2011     | Cross-sectional                                                                                                                                                            | Monthly household income (5 levels)<br>Education level (6 levels)<br>Employment status (6 levels)                                                                                                                                             | Sleep quality (PSQI global score >5)                                                                                                                                                | Except for students, respondents in all non-full-time employment status categories had higher odds of poor      |                                                                                                                                                                                                             |

|             |                                                                                                          |                                                                                                                                                                                                                                    |                                                                                                                                                                                                     |                                                                                                                                                                        |
|-------------|----------------------------------------------------------------------------------------------------------|------------------------------------------------------------------------------------------------------------------------------------------------------------------------------------------------------------------------------------|-----------------------------------------------------------------------------------------------------------------------------------------------------------------------------------------------------|------------------------------------------------------------------------------------------------------------------------------------------------------------------------|
|             | 5001 adults from the general population in Hong Kong                                                     |                                                                                                                                                                                                                                    |                                                                                                                                                                                                     | sleep quality than their full-time counterparts                                                                                                                        |
| Zhang 2011  | Cohort<br>1611 children 6-13y from primary schools in Hong Kong followed for 5y                          | Parental educational level (<12 years vs ≥12 years)<br>Family income (≤HK\$15,000/month vs >HK\$15,000/month)                                                                                                                      | Insomnia symptoms ≥3 times/week over the past 12 months                                                                                                                                             | Lower paternal education level was associated with incident insomnia                                                                                                   |
| Adams 2012  | Cross-sectional<br>3007 adults ≥15y from the general population of South Australia                       | Education (high school or less, still studying, trade/diploma, university degree or higher)<br>Household income (\$<30000, 30–60000, 60–100000, >100000)                                                                           | High risk OSA (STOP-BANG questionnaire)                                                                                                                                                             | High risk for OSA was associated with less education and lower income                                                                                                  |
| Blümel 2012 | Cross-sectional<br>6079 women 40-59y recruited from 20 healthcare centres in 11 Latin American countries | Education (≤ vs >12 years)                                                                                                                                                                                                         | Insomnia (AIS score >5)<br>Sleep quality (PSQI global score >5)                                                                                                                                     | Higher educational level was an independent risk factor related to less insomnia and better sleep quality                                                              |
| Bøe 2012    | Cross-sectional<br>5781 children 11-13 y from all public and private schools in Bergen, Norway           | Family economy (very good, good, average, poor)<br>Parental education (elementary school, high school, college/university)                                                                                                         | Parent-reported difficulties initiating and/or maintaining sleep (DIMS) (not true, somewhat true, certainly true)<br>Parent-reported sleep duration (time in bed) (≤2 SD, -2 to ≤1 SD, -1 to +1 SD) | Children with poor family economy had significantly higher odds of reporting DIMS and short TIB. Lower maternal education was significantly associated with short TIB. |
| Brug 2012   | Cross-sectional<br>7234 children 10-12y from primary schools in 7 European countries                     | Parental education (both parent/caregivers with fewer than 14 years of education vs at least one parent/caregiver with 14 or more years of education)                                                                              | Parent-reported sleep duration                                                                                                                                                                      | No significant differences in sleeping behavior were reported between high and lower educated parents                                                                  |
| Calem 2012  | Cross-sectional<br>20503 adults 16-64y from the general population of England, UK                        | Education level (“A-level” or higher, “O-level” or “GCSE”, left school before the age of 16 and/or with no educational qualifications)<br>Employment status (currently in employment, currently unemployed, economically inactive) | Insomnia DSM-IV criteria                                                                                                                                                                            | Insomnia was associated with lower levels of education, unemployment and economic inactivity                                                                           |
| Green 2012  | Cohort                                                                                                   | Household occupational class (manual vs non-manual)                                                                                                                                                                                | Repeated measures latent class analysis of 2 insomnia                                                                                                                                               | Respondents from manual occupational classes were more likely                                                                                                          |

|                |                                                                                                                                            |                                                                                                                                                                                                                                                                     |                                                                                                                                                                 |                                                                                                                                                                         |                                                                                                                                     |
|----------------|--------------------------------------------------------------------------------------------------------------------------------------------|---------------------------------------------------------------------------------------------------------------------------------------------------------------------------------------------------------------------------------------------------------------------|-----------------------------------------------------------------------------------------------------------------------------------------------------------------|-------------------------------------------------------------------------------------------------------------------------------------------------------------------------|-------------------------------------------------------------------------------------------------------------------------------------|
|                | 2867 adults from 2 age cohorts (born in 1932 and 1952) from the general population of the greater Glasgow area, Scotland followed for 20 y |                                                                                                                                                                                                                                                                     | symptoms (sleep latency and maintenance) assessed in 5 time points that identified 4 classes: healthy, episodic, developing, and chronic mixed                  | than their non-manual counterparts to be in the Developing or Chronic Mixed latent classes relative to the Healthy class                                                |                                                                                                                                     |
| Guo 2012       | Cross-sectional<br>4445 children and adolescents 5-18 y from 12 public schools in Shenyang, China                                          | Monthly family income (<2000 RMB, 2000-5000 RMB, >5000 RMB)<br>Parental education (both less than high school, at least one above high school, both more than high school)                                                                                          | Self-reported sleep duration (>7.5 h vs <7.5 h)                                                                                                                 | Family income and parental education was not associated with children reporting sufficient sleep                                                                        |                                                                                                                                     |
| Heilemann 2012 | Cross-sectional<br>312 women of Mexican descent 21-40y recruited from advertisements in an urban Northern California community             | Monthly income<br>Employment status (employed vs unemployed)                                                                                                                                                                                                        | Sleep disturbance (General Sleep Disturbance Scale score)                                                                                                       | Low income women reported more sleep disturbance than high income                                                                                                       |                                                                                                                                     |
| Kachikis 2012  | Cross-sectional<br>2670 women 18-55 y attending University of Texas Medical Branch Regional Maternal & Child Health Program clinics        | Education (less than a high school diploma, high school diploma, more than a high school diploma)<br>Employment status (employed vs unemployed)<br>Annual household income (<\$5000, \$5000-\$15000, >\$15000)<br>Residence in a public housing project (yes vs no) | Self-reported sleep duration<br>Sleep quality (single question, 5 levels)<br>Sleep adequacy (single question, 5 levels)                                         | Shorter sleep duration was associated with higher education. Better sleep quality was associated with being employed, living in public housing and having lower income. |                                                                                                                                     |
| Lallukka 2012  | Cross-sectional<br>5578 adults 30-79 y from the general population in Finland                                                              | Education (<7, 7-9, 10-12, >12 years)<br>Household income level (in quartiles)<br>Employment status (working, unemployed, retired due to old age, retired due to disability, retired due to other reason, other)                                                    | Self-reported sleep duration (<5, 5, 6, 7, 8, 9, >9 h)<br>Insomnia-related symptoms (Symptom Checklist-90, single question, 3 levels: no, occasional, frequent) | Those with low household income levels, the unemployed, and disability retirees were the most likely to report short or long sleep duration and poor sleep.             | The association between household income level and frequent insomnia symptoms was reduced after adjusting for self-perceived health |
| Lima 2012      | Cross-sectional<br>2637 adults from the general population in Campinas, Brazil                                                             | Education (0-3, 4-7, 8-11, >11 y)<br>Per capita monthly household income (1 minimum salary or less, 1-3 times the minimal salary, 3 or more times the minimum salary)<br>Work status (working, not working, housewife)                                              | Sleep duration (<7, 7-8, >8 h)                                                                                                                                  | Long sleep was more prevalent among those with a lower level of education, those who did not work and housewives                                                        |                                                                                                                                     |

|                  |                                                                                                                                           |                                                                                                                                                                                       |                                                                                                                                                                                                                                                                |                                                                                                                                                                                                                              |
|------------------|-------------------------------------------------------------------------------------------------------------------------------------------|---------------------------------------------------------------------------------------------------------------------------------------------------------------------------------------|----------------------------------------------------------------------------------------------------------------------------------------------------------------------------------------------------------------------------------------------------------------|------------------------------------------------------------------------------------------------------------------------------------------------------------------------------------------------------------------------------|
|                  |                                                                                                                                           | Number of household appliances ( $\leq 10$ , $> 10$ ).                                                                                                                                |                                                                                                                                                                                                                                                                |                                                                                                                                                                                                                              |
| Marco 2012       | Cross-sectional<br>155 seventh-grade students from two urban middle schools in New England                                                | SES factor from principal components analysis (income, education level, number of adults working in the home, and proportion of single-family homes in the neighborhood)              | 1-week actigraphy that assessed sleep patterns (sleep onset, sleep offset, sleep period, and minutes asleep), sleep consistency (standard deviation for each sleep outcome across nights) and sleep regularity (differences between school and weekend nights) | Adolescents living in lower socioeconomic conditions experienced significantly poorer sleep outcomes in terms of the timing, duration, consistency, and regularity across the week                                           |
| Mazzotti 2012    | Cross-sectional<br>16680 adults $\geq 65$ y residents in catchment areas within eight low- and middle-income countries                    | Education (none, not completed primary, completed primary, completed secondary, completed tertiary)<br>Assets (in quartiles)<br>Food insecurity (no vs at least occasional)<br>Income | Sleep disturbance (single question, yes vs no)                                                                                                                                                                                                                 | Higher educational status was significantly associated with a decreased risk of reporting sleep complaints                                                                                                                   |
| Nicholson 2012   | Cross-sectional<br>5107 infants 0-1 y and 4983 children 4-5 y from the general population of Australia that were reassessed 2 years later | Composite variable (family annual income, years of parental education, parental occupational status) divided in quintiles                                                             | Two or more parent-reported sleep problems (difficulty getting to sleep, not happy sleeping alone, waking during the night, and restless sleep), four or more nights per week                                                                                  | Lower SES was associated with increased odds for parent-reported sleep problems                                                                                                                                              |
| Nishikitani 2012 | Cross-sectional<br>1344 women recruited from the alumnae of a national university in Tokyo, Japan                                         | Employment status (housewives, working with or without family demands)                                                                                                                | Short sleep ( $< 6$ h)<br>Sleep latency ( $> 30$ min)<br>Insomnia symptoms                                                                                                                                                                                     | Shortage of sleep was significantly more frequent in both sets of working women than in housewives. Sleep dissatisfaction was significantly more frequent among working women without family demands compared to housewives. |
| Rosenbaum 2012   | Cross-sectional<br>11302 young adults 26-32y from an established school cohort in USA                                                     | Highest education (high school diplomas, community college certificates and associate's degrees, bachelor's degrees)                                                                  | Self-reported sleep problems (snoring/stopping breathing during sleep, problems falling asleep or staying asleep)                                                                                                                                              | Young adults whose highest degree was a BA were less likely to have sleep problems compared with young adults whose highest degree was a community college credential                                                        |
| Soltani 2012     | Cross-sectional                                                                                                                           | Family income per week ( $> \$1,000$ , $\$700$ - $\$1000$ , $\$400$ - $\$700$ , $< \$400$ )                                                                                           | PSQI global score (0-5, 5-10, $> 10$ )                                                                                                                                                                                                                         | Women with poor sleep quality were more likely to have not completed<br>Adjusting for mental (anxiety and depression)                                                                                                        |

|               |                                                                                                                                           |                                                                                                                                                                                                                                                                                 |                                                                        |                                                                                                                                                               |                                                                                                                                                    |
|---------------|-------------------------------------------------------------------------------------------------------------------------------------------|---------------------------------------------------------------------------------------------------------------------------------------------------------------------------------------------------------------------------------------------------------------------------------|------------------------------------------------------------------------|---------------------------------------------------------------------------------------------------------------------------------------------------------------|----------------------------------------------------------------------------------------------------------------------------------------------------|
|               | 3655 women from an already established cohort in Queensland, Australia                                                                    | Highest level of education (tertiary, complete high school, incomplete high school)<br>Housing tenure (own, rent)<br>Employment status (employed, home duties, unemployed/economically inactive)                                                                                |                                                                        | high school, to be either unemployed or to be undertaking home duties and to be renting their current home                                                    | and physical (self-perceived physical health, number of chronic illnesses, BMI) health factors attenuated those relationships except for education |
| Stranges 2012 | Cross-sectional<br>43935 adults ≥50y from the general population in 8 Health and Demographic Surveillance System sites in Africa and Asia | Education (no formal education; less than 6y; 6y or more)<br>Wealth index (according to dwelling characteristics and household possessions, in quintiles)                                                                                                                       | Insomnia symptoms (none/mild/moderate vs severe/ extreme)              | There was no significant association between SES and insomnia symptoms                                                                                        |                                                                                                                                                    |
| Talala 2012   | Cross-sectional<br>70115 adults 26-64 y from the general population of Finland during a period of 23 years                                | Employment status (employed, unemployed, student, retired, housewife)<br>Education (3 levels)<br>Household income (quintiles)                                                                                                                                                   | Self-reported insomnia (single question, yes vs no)                    | Low education in men and retirement or unemployment in both sexes were associated with insomnia. Low income was protective factor for insomnia in both sexes. | Adjustment for depression partially attenuated the effects of education and employment status but increased the effects of income                  |
| Tu 2012       | Cross-sectional<br>68832 women 44-74y from the general population in 7 urban communities of Shanghai, China                               | Educational attainment level (elementary school or under, middle school, high school, college or above)<br>Occupational status (professional, clerical, manual laborer, housewife)<br>Annual family income (<10,000 yuan, 10,000–19,999 yuan, 20,000–29,999 yuan, ≥30,000 yuan) | Sleep duration (≤4, 5, 6, 7, 8, 9, ≥10h)                               | Lower education, income, and occupational status was associated with both short and long sleep duration                                                       |                                                                                                                                                    |
| Wall 2012     | Cross-sectional<br>1073116 adults >50 y registered in the UK Health Improvement Network database                                          | Social class (quintiles of Townsend score derived from the 2001 UK Census and linked by post code to area of residence)                                                                                                                                                         | Physician diagnosis of OSA<br>Self-reported snoring                    | The odds of OSA diagnosis and snoring decreased with increasing levels of socioeconomic disadvantage                                                          |                                                                                                                                                    |
| Zhang 2012    | Cohort<br>2316 parents of primary school children in Hong Kong followed for 5y                                                            | Educational level (<12 vs ≥12 years)<br>Employment status (employed vs unemployed/housewife)<br>Family income (less than or equal to HK\$15,000/month vs more than HK\$15,000/month)                                                                                            | Insomnia symptoms for at least three times per week over the past year | Unemployment was associated with incident insomnia. Lower education was associated with persistent insomnia                                                   |                                                                                                                                                    |

|                |                                                                                                                |                                                                                                                                                                                                                                                                                                                             |                                                                                                                                                                                     |                                                                                                                                                                                                                                                                                            |                                                                                                                                                                 |
|----------------|----------------------------------------------------------------------------------------------------------------|-----------------------------------------------------------------------------------------------------------------------------------------------------------------------------------------------------------------------------------------------------------------------------------------------------------------------------|-------------------------------------------------------------------------------------------------------------------------------------------------------------------------------------|--------------------------------------------------------------------------------------------------------------------------------------------------------------------------------------------------------------------------------------------------------------------------------------------|-----------------------------------------------------------------------------------------------------------------------------------------------------------------|
| Ansarin 2013   | Cross-sectional<br>5545 subjects >16 y from the general US population                                          | Education (7 levels)                                                                                                                                                                                                                                                                                                        | OSA symptoms: habitual snoring (often/almost every night), combined with daytime sleepiness (often/almost always) and/or witnessed apnea (often/almost every night)                 | Individuals in the lowest education category had less complaints of OSA symptoms                                                                                                                                                                                                           |                                                                                                                                                                 |
| Biggs 2013     | Cross-sectional<br>1845 children 5-10 y from 32 primary schools in Adelaide, Australia                         | Area SES index based on postal code (low, mid, high)                                                                                                                                                                                                                                                                        | Parent-reported sleep duration                                                                                                                                                      | Children from low SES areas reported later bedtimes and reduced sleep opportunity than children from higher SES areas                                                                                                                                                                      |                                                                                                                                                                 |
| Chen 2013      | Cross-sectional<br>2113 adolescents 15-17y from the general population of Taiwan                               | Household annual income levels (less than NT\$400,000, \$400,000-\$999,999, above \$1,000,000)<br>Education level of the head of household (primary education or less, senior high school or occupational high school, college degree or higher)<br>Employment status of the head of the household (employed vs unemployed) | Insomnia symptoms (Insomnia Self-assessment Inventory, often/always vs never/seldom)                                                                                                | Insomnia was not associated with any of the SES measures                                                                                                                                                                                                                                   |                                                                                                                                                                 |
| El-Sheikh 2013 | Cross-sectional<br>276 third- and fourth-grade children recruited from 7 public schools in the southeastern US | Income-to-needs ratio (computed by dividing family income by the federal poverty threshold for that family size)<br>Perceived economic well-being (composed of three Conger scales: can't make ends meet, material needs, and financial cutbacks)<br>Maternal education (7 levels)                                          | 7-day actigraphy (sleep minutes, sleep efficiency, sleep onset variability)<br>Child-reported sleep/wake problems (Sleep/Wake Problems Scale of the Children's Sleep Habits Survey) | Lower income-to-needs ratio predicted higher levels of reported sleep/wake problems. Lower parental perceived economic well-being was associated with shorter sleep minutes and greater variability in sleep onset. Lower mother's education was associated with lower sleep efficiency.   | African American children's sleep was more negatively affected by income-to-needs ratio and mother's education than was the sleep of European American children |
| Grandner 2013  | Cross-sectional<br>4081 adults from the general US population                                                  | Household income (above vs below \$20,000)<br>Education level (<9th grade, 9th to 11th grade, high school graduate, some college, college graduate)<br>Access to private health insurance (yes vs no)<br>Household food security (combination of 18 items and categorised as full, marginal, low, very low)                 | Sleep latency >30min (yes vs no)<br>Insomnia symptoms (never, rarely, sometimes, often, almost always)<br>Daytime sleepiness (never, rarely, sometimes, often, almost always)       | Lower income was associated with difficulty falling asleep, lower education with sleep latency >30 min, non-restorative sleep, snorting/gasping and snoring, no private insurance with sleep latency >30 min and non-restorative sleep and lower household food security with all symptoms | Adjusting for self-assessed physical and mental health attenuated the effects of income                                                                         |

|                 |                                                                                                     |                                                                                                                                                                                                                                                             |                                                                                                                                                                                                                           |                                                                                                                                                                                                                                                                                                                                                       |                                                                                                                                                                |
|-----------------|-----------------------------------------------------------------------------------------------------|-------------------------------------------------------------------------------------------------------------------------------------------------------------------------------------------------------------------------------------------------------------|---------------------------------------------------------------------------------------------------------------------------------------------------------------------------------------------------------------------------|-------------------------------------------------------------------------------------------------------------------------------------------------------------------------------------------------------------------------------------------------------------------------------------------------------------------------------------------------------|----------------------------------------------------------------------------------------------------------------------------------------------------------------|
|                 |                                                                                                     |                                                                                                                                                                                                                                                             | Sleep apnea symptoms (never, rarely, sometimes, frequently)                                                                                                                                                               |                                                                                                                                                                                                                                                                                                                                                       |                                                                                                                                                                |
| Hartz 2013      | Cross-sectional<br>148938 women 50-79y enrolled at 40 clinical centres throughout the US            | Education (11 levels)<br>Income (8 levels)                                                                                                                                                                                                                  | Insomnia symptoms (WHI Insomnia Rating Scale score)                                                                                                                                                                       | Lower education was associated with more severe insomnia symptoms                                                                                                                                                                                                                                                                                     |                                                                                                                                                                |
| Hoefelmann 2013 | Cross-sectional<br>11557 adolescents 15-19y from high schools in Santa Catarina, Brazil             | Monthly family income (in tertiles)                                                                                                                                                                                                                         | Short sleep (<8h)<br>Poor sleep quality (sometimes/hardly ever/never vs always/nearly always)                                                                                                                             | Higher family income was associated with both short sleep and poor sleep quality                                                                                                                                                                                                                                                                      |                                                                                                                                                                |
| Hsu 2013        | Retrospective cohort<br>970769 enrollees in a health insurance database in Taiwan followed for 1y   | Insurable monthly wage (>NTD 40,000, NTD 20,000-40,000, <NTD 20,000)                                                                                                                                                                                        | Healthcare-seeking insomnia (ICD-9-CM codes 780.52, 307.41 and 307.42)                                                                                                                                                    | Higher SES was associated with greater risk for insomnia in men but lower risk in women. Middle SES group predicted greater insomnia risk for both genders than lower SES.                                                                                                                                                                            |                                                                                                                                                                |
| Innes 2013      | Cross-sectional<br>1217 adults visiting 4 primary care clinics in Morgantown area, West Virginia    | Education (<12 years, high school graduate, some college, college graduate)<br>Employment status (employed, unemployed/out of work, homemaker, retired, student, disabled)<br>Annual household income (<\$25,000, \$25,000-50,000, \$50-75,000, >\$75,000). | RLS diagnosis based on IRLSSG diagnostic criteria (7-item questionnaire)                                                                                                                                                  | Those with RLS were more likely to have lower income and be unemployed or disabled and less likely to be college educated than those without RLS                                                                                                                                                                                                      |                                                                                                                                                                |
| Jarrin 2013     | Cross-sectional<br>177 adults 30-65 y recruited from advertisements in Montreal, Canada             | Objective SES: household income, years of education, employment status (employed vs. unemployed)<br>Subjective SES: MacArthur Scale of Subjective Social Status (scale 1-10)                                                                                | Sleep quality (PSQI Global score)<br>Sleep latency (PSQI sleep latency subscale)<br>Weekday sleep duration<br>Weekend oversleep (difference between weekend and weekday total sleep duration)<br>Daytime sleepiness (ESS) | Higher SES was associated with better sleep quality, shorter sleep latency, longer sleep duration, shorter weekend oversleep, and less daytime sleepiness. Subjective SES better predicted sleep duration, weekend oversleep and daytime sleepiness than objective SES. Objective SES better predicted sleep quality and latency than subjective SES. | After controlling for self-rated mental health and perceived stress the effects of subjective SES on sleep quality and income on sleep latency were attenuated |
| Kidwai 2013     | Cross-sectional<br>1488 adults from the general population in five communities of Karachi, Pakistan | Income (5 levels)<br>Employment status (employed, unemployed, homemaker)<br>Financial problems (yes vs no)                                                                                                                                                  | Insomnia (single question, yes vs no)                                                                                                                                                                                     | Those who experienced financial problems were significantly more likely to report insomnia                                                                                                                                                                                                                                                            |                                                                                                                                                                |

|                     |                                                                                                              |                                                                                                                                                                                         |                                                          |                                                                                                                                                                                                                                                                                                                                                                                                                                             |                                                                                                                       |
|---------------------|--------------------------------------------------------------------------------------------------------------|-----------------------------------------------------------------------------------------------------------------------------------------------------------------------------------------|----------------------------------------------------------|---------------------------------------------------------------------------------------------------------------------------------------------------------------------------------------------------------------------------------------------------------------------------------------------------------------------------------------------------------------------------------------------------------------------------------------------|-----------------------------------------------------------------------------------------------------------------------|
| Kim 2013            | Cross-sectional<br>1985 adults ≥65y from the general population of South Korea                               | Education (no vs some)                                                                                                                                                                  | Insomnia (DSM-IV criteria)                               | There were significant relationships between a lack of education and difficulty in initiating or maintaining sleep and early morning awakening                                                                                                                                                                                                                                                                                              |                                                                                                                       |
| Luo 2013            | Cross-sectional<br>1086 adults ≥60y from the general population of the Jingansi community in Shanghai, China | Years of education                                                                                                                                                                      | Sleep quality (PSQI global score >5)                     | Increased duration of education was associated with a higher risk of poor sleep quality                                                                                                                                                                                                                                                                                                                                                     |                                                                                                                       |
| Mindell 2013        | Cross-sectional<br>10085 mothers of children 0-6y recruited from online advertisements in 14 countries       | Education (elementary school, high school, college, post-graduate)<br>Employment status (employed vs non-employed)                                                                      | Sleep quality (PSQI global score >5)                     | Not being employed and lower education level predicted higher likelihood of having poor sleep                                                                                                                                                                                                                                                                                                                                               |                                                                                                                       |
| Yoshioka 2013       | Cross-sectional<br>5946 male employees 34-59 y from two local governments in Japan                           | Employment level (higher-level non-manual workers, lower-level non-manual workers, manual workers)                                                                                      | Insomnia (Athens Insomnia Scale score >5)                | Lower employment level was significantly associated with the risk of insomnia                                                                                                                                                                                                                                                                                                                                                               | Job strain and effort-reward ratio attenuated those relationships, while over commitment strengthened them            |
| Anders 2014         | Cross-sectional<br>3281 adults 16-72 y from the general population of eight urban areas in Germany           | Winkler Index (composite score based on participant's school and occupational education, net household income, and current occupational status and categorised as low, medium and high) | Sleep quality (PSQI global score >5)                     | The probability of good sleep quality in participants increased with a higher SES                                                                                                                                                                                                                                                                                                                                                           | Presence of physical diseases and psychological predictors (anxiety, depression) partially attenuated the association |
| Basner 2014         | Cross-sectional<br>124517 adults ≥15y from the general US population                                         | Education (less than high school, high school graduate, college graduate, master's degree or higher)<br>Family income (6 levels)<br>Employment status (10 levels)                       | Sleep duration<br>Short sleep (≤6h)<br>Long sleep (≥11h) | Higher educational attainment was associated with less sleep, but lower odds of being a short or long sleeper. Family income and sleep duration were negatively correlated and the odds of being a long sleeper decreased with increasing family income. Respondents who were unemployed, retired, or not in the labor force obtained significantly more sleep, were less likely to be short sleepers, and more likely to be long sleepers. |                                                                                                                       |
| Carrillo-Larco 2014 | Cross-sectional                                                                                              | Education (none/primary school, high school, higher)                                                                                                                                    | Self-reported sleep duration (<6, 6-8, >8 h)             | Participants with lower education were more likely to have long sleep                                                                                                                                                                                                                                                                                                                                                                       |                                                                                                                       |



|                |                                                                                                                           |                                                                                                                                                                                                                                            |                                                                                                                                                                                                                                                |                                                                                                                                                                                                                                                                                                                                                                                               |
|----------------|---------------------------------------------------------------------------------------------------------------------------|--------------------------------------------------------------------------------------------------------------------------------------------------------------------------------------------------------------------------------------------|------------------------------------------------------------------------------------------------------------------------------------------------------------------------------------------------------------------------------------------------|-----------------------------------------------------------------------------------------------------------------------------------------------------------------------------------------------------------------------------------------------------------------------------------------------------------------------------------------------------------------------------------------------|
|                | 12424 adolescents and adults ≥12 y from the general population of Peru                                                    | Asset index (in tertiles)<br>Job status (yes vs no)                                                                                                                                                                                        |                                                                                                                                                                                                                                                | duration and less likely to have short sleep duration. Those with higher asset index were less likely to report long sleep. Employed had a higher probability of being short sleepers and lower probability of being long sleepers than unemployed.                                                                                                                                           |
| Gjevre 2014    | Cross-sectional<br>7597 adults from the general population in Saskatchewan province, Canada                               | Household income adequacy (4 levels)<br>Money left over at the end of the month (some, just enough, not enough)<br>Education (less than high school, completed high school, completed university, completed other postsecondary education) | EDS (ESS score >10)                                                                                                                                                                                                                            | Not enough money left over at the end of the month increased the risk of EDS                                                                                                                                                                                                                                                                                                                  |
| Gubelmann 2014 | Cross-sectional<br>3853 adults recruited between 2005 and 2011 from the general population in Geneva canton, Switzerland  | Education (university level yes/no)<br>Income (<5000 SFr, 5000-9500 SFr, >9500 SFr)                                                                                                                                                        | Self-reported time in bed (two threshold limits: <7, 7-9, >9 h and <8, 8-10, >10 h)                                                                                                                                                            | Low educational level was associated with long TIB. Participants with high income had lower prevalence of short and long TIB.                                                                                                                                                                                                                                                                 |
| Jarrin 2014    | Cross-sectional<br>239 children and adolescents 8-17 y recruited from schools and neighborhoods in Montreal, Canada       | Objective SES: household income (17 categories) and highest parental education (9 categories)<br>Subjective SES: Subjective Social Status Scale-Youth Version (two 10-rung ladders: school and society, youth reported)                    | Sleep quality (youth-rated, 10-point scale)<br>Daytime sleepiness (youth-rated, Pediatric Daytime Sleepiness Scale)<br>Sleep disturbances (parent-rated, Children's Sleep Habits Questionnaire)<br>Sleep duration (youth- and parent-reported) | In children, higher subjective SES predicted less daytime sleepiness and longer self-reported sleep duration and higher household income predicted longer parent-reported sleep duration. In adolescents, higher subjective SES was associated with better sleep quality and shorter parent-reported sleep duration and higher household income was associated with fewer sleep disturbances. |
| Kang 2014      | Cross-sectional<br>7955 adults from the general population of 9 communities in the west area of Gyeongnam province, Korea | Education (no education, elementary school, middle school, high school, above high school)<br>Occupation (farmers, white-collar workers, blue-collar workers, others)                                                                      | High risk OSA (Berlin Questionnaire)                                                                                                                                                                                                           | Education and occupation were not associated with OSA risk                                                                                                                                                                                                                                                                                                                                    |

|                |                                                                                                      |                                                                                                                                                                                              |                                                                                                                       |                                                                                                                                                                                        |                                                                                                  |
|----------------|------------------------------------------------------------------------------------------------------|----------------------------------------------------------------------------------------------------------------------------------------------------------------------------------------------|-----------------------------------------------------------------------------------------------------------------------|----------------------------------------------------------------------------------------------------------------------------------------------------------------------------------------|--------------------------------------------------------------------------------------------------|
| Karaman 2014   | Cross-sectional<br>1996 adults >19y from the general population in Tokat, Turkey                     | Education level (primary school or less vs higher)<br>Income level (US\$<400, 400–799, 800–1200, >1200)                                                                                      | Sleep quality (PSQI global score)                                                                                     | Higher income was associated with poorer sleep quality                                                                                                                                 |                                                                                                  |
| Leng 2014      | Cross-sectional<br>8480 adults 49-90 y from an already established cohort in Norwich, UK             | Social class (non-manual vs manual)<br>Educational level (lower vs higher)<br>Working status (not working, working <35 h/week, working >35 h/week)                                           | Self-reported time in bed and sleep duration<br>Sleep proportion (ratio of night-time sleep duration and time in bed) | Sleep duration and proportion increased in participants of higher educational level. Increasing working hours were associated with shorter sleep duration but higher sleep proportion. |                                                                                                  |
| Liviya NG 2014 | Cross-sectional<br>707 adults recruited from 10 workplaces in Melbourne, Australia                   | Education (nontertiary vs tertiary)<br>Occupation (manager, professional, associate professional, clerical or service)<br>Income per week (≥\$2000, \$1600–\$1999, \$1000–\$1599, \$0–\$999) | Excessive daytime sleepiness (ESS score >10)                                                                          | There was no association between SES and EDS                                                                                                                                           |                                                                                                  |
| McDonald 2014  | Cross-sectional<br>1702 children 14–27 months members of a British twin birth cohort                 | Maternal education (up to secondary school vs college and beyond)                                                                                                                            | Short sleep (<11h)                                                                                                    | Lower maternal education significantly increased the odds of shorter sleep                                                                                                             | A later bedtime significantly mediated the association between lower education and shorter sleep |
| Paine 2014     | Cross-sectional<br>4330 adults 20-59 y from the general population in New Zealand                    | Work status (unemployed, no night work, night work)                                                                                                                                          | ASPD/DSPD symptoms (Munich Chronotype Questionnaire)                                                                  | Night work was associated with reporting both ASPD and DSPD                                                                                                                            |                                                                                                  |
| Pallesen 2014  | Cross-sectional<br>4001 adults from the general population in Norway                                 | Composite measure of education and income (below vs above mean)                                                                                                                              | Insomnia symptoms based on DSM-IV criteria (questionnaire)                                                            | Low SES was associated with sleep-onset insomnia, early morning awakening insomnia, daytime impairment and DSM-IV insomnia                                                             |                                                                                                  |
| Pan 2014       | Cross-sectional<br>38638 adults from the general US population                                       | Annual income (0-19,999\$; 20,000-49,999\$; 50,000-74,999\$; ≥75,000\$)<br>Education level (less than high school vs high school graduate)                                                   | Self-reported diagnosis of sleep apnea                                                                                | No significant associations were found between sleep apnea and education or income                                                                                                     |                                                                                                  |
| Seib 2014      | Cross-sectional<br>322 women 60-70 y from the general population in South-East Queensland, Australia | Employment status (employed, domestic duties, unemployed/disability pension, retired)<br>Income (<20000 AUD, 20000-80000 AUD, >80000 AUD)                                                    | Sleep disturbance (General Sleep Disturbance Scale)                                                                   | Women who were unemployed or on a disability support pension reported more sleep disturbance                                                                                           |                                                                                                  |
| Speirs 2014    | Cross-sectional                                                                                      | Maternal education (less than college degree vs higher)                                                                                                                                      | Parent-reported sleep duration                                                                                        | Children whose mothers were employed full time were less likely to                                                                                                                     |                                                                                                  |

|                |                                                                                                       |                                                                                                                                                                                                                                                                                                                     |                                                                                                                                                                      |                                                                                                                                                                                                                                                                                        |                                                                                                                                                                                                                                                                                                           |
|----------------|-------------------------------------------------------------------------------------------------------|---------------------------------------------------------------------------------------------------------------------------------------------------------------------------------------------------------------------------------------------------------------------------------------------------------------------|----------------------------------------------------------------------------------------------------------------------------------------------------------------------|----------------------------------------------------------------------------------------------------------------------------------------------------------------------------------------------------------------------------------------------------------------------------------------|-----------------------------------------------------------------------------------------------------------------------------------------------------------------------------------------------------------------------------------------------------------------------------------------------------------|
|                | 247 children 2-3y from 32 childcare centers in Urbana, Illinois                                       | Annual household income (5 levels)<br>Maternal employment status (full-time, part-time, minimal or no employment)                                                                                                                                                                                                   |                                                                                                                                                                      | sleep longer hours compared to those whose mothers were employed <20h per week                                                                                                                                                                                                         |                                                                                                                                                                                                                                                                                                           |
| Takahashi 2014 | Cross-sectional<br>55 employees in Toyama, Japan                                                      | Household income (divided by the square root of household size)<br>Occupational class (high or low)                                                                                                                                                                                                                 | 7-day actigraphy (total sleep time, sleep efficiency, mean activity during sleep, sleep-onset latency, wake after sleep onset)<br>Sleep quality (PSQI global score)  | There was no association between SES and sleep parameters or quality                                                                                                                                                                                                                   | After adjusting for work schedule, weekly work hours and psychosocial work characteristics (job demand/control/support, effort-reward imbalance, organizational justice, workplace social capital) low occupational class was associated with longer sleep duration and better quality of perceived sleep |
| Uhlig 2014     | Cross-sectional<br>47453 adults ≥20y from the general population of the Nord-Trøndelag County, Norway | Employment status (employed vs unemployed)                                                                                                                                                                                                                                                                          | Insomnia (DSM-V criteria)                                                                                                                                            | Employed showed higher odds for insomnia than unemployed                                                                                                                                                                                                                               |                                                                                                                                                                                                                                                                                                           |
| Whinnery 2014  | Cross-sectional<br>4850 adults from the general US population                                         | Annual income (8 levels)<br>Education level (<high school, some high school, high school graduate, some college, college graduate)<br>Access to insurance (no, public, private)<br>Home ownership (yes vs no)<br>Household food security (combination of 18 items and categorised as full, marginal, low, very low) | Sleep duration (<5, 5-6, 7-8, >8 h)                                                                                                                                  | Lower income groups reported more very short sleep. Increased very short sleep was seen among all lower education levels. Those with public insurance reported more very short and long sleep versus uninsured. Very low food security was associated with very short and short sleep. |                                                                                                                                                                                                                                                                                                           |
| Bagley 2015    | Cross-sectional<br>271 children recruited from semirural public schools in the southeastern US        | Income-to-needs ratio (computed by dividing family income by the federal poverty threshold for the same family size)                                                                                                                                                                                                | 1-week actigraphy (sleep duration, night waking duration, variability in sleep schedule)<br>School Sleep Habits Survey (Sleep/Wake Problems Scale, Sleepiness Scale) | Lower income-to-needs ratio was related to shorter sleep duration, greater sleep/wake problems, and increased sleepiness                                                                                                                                                               | Environmental conditions and presleep worries partially mediated the relation with sleep/wake problems and fully mediated the relation with sleepiness                                                                                                                                                    |
| Baiden 2015    | Cross-sectional                                                                                       | Postsecondary education (no vs yes)<br>Annual personal income (6 levels)                                                                                                                                                                                                                                            | Insomnia symptoms (most/all of the time vs                                                                                                                           | Higher annual income was associated with less troubled sleep                                                                                                                                                                                                                           |                                                                                                                                                                                                                                                                                                           |

|                 |                                                                               |                                                                                                                                                                                                                                    |                                                                                                                                                         |                                                                                                                                                                                                                                                                             |                                                                                                                                                                                                                                                                                                           |
|-----------------|-------------------------------------------------------------------------------|------------------------------------------------------------------------------------------------------------------------------------------------------------------------------------------------------------------------------------|---------------------------------------------------------------------------------------------------------------------------------------------------------|-----------------------------------------------------------------------------------------------------------------------------------------------------------------------------------------------------------------------------------------------------------------------------|-----------------------------------------------------------------------------------------------------------------------------------------------------------------------------------------------------------------------------------------------------------------------------------------------------------|
|                 | 19349 subjects >15 y from the general population of Canada                    |                                                                                                                                                                                                                                    | none/a little of/some of the time)                                                                                                                      |                                                                                                                                                                                                                                                                             |                                                                                                                                                                                                                                                                                                           |
| Benbir 2015     | Cross-sectional<br>4758 adults from the general population in Turkey          | Educational status (none, 5 y, 6-8 y, 9-11 y, <11 y)<br>Monthly household income (<\$500, \$500-1000, \$1000-1500, >\$1500)<br>Working status (paid job, owns a business, lease payments, retired, housewife, student, unemployed) | Insomnia symptoms based on DSM-IV criteria (questionnaire)                                                                                              | Insomnia diagnosis was associated with lower income level and being unemployed                                                                                                                                                                                              |                                                                                                                                                                                                                                                                                                           |
| Bonke 2015      | Cross-sectional<br>5022 adults 18-64 y from the general population in Denmark | Education (no post-school education, vocational education, short, medium, and long tertiary education)<br>Employment (no job, work hours <37, 37, 38-44, 45+, retired)                                                             | Self-reported sleep duration (<6, 6-8, >8 h)                                                                                                            | In women higher education decreased the likelihood of short sleep.<br>Unemployed and retired men were more likely to be long sleepers.<br>Retired and part-time working women were more likely to be long sleepers and retired women were less likely to be short sleepers. |                                                                                                                                                                                                                                                                                                           |
| Buxton 2015     | Cross-sectional<br>1103 children 6-17y from the general US population         | Parental education (college graduate vs less)                                                                                                                                                                                      | Parent-reported sleep duration (sufficient vs insufficient, cut-offs according to age)<br>Parent-rated sleep quality (excellent vs less than excellent) | Higher parental education was associated with higher odds of sufficient sleep duration                                                                                                                                                                                      | The odds were attenuated and became non-significant after controlling for presence of rules on limiting child caffeine and enforcing bedtimes and for leaving any technology on in the children's bedroom                                                                                                 |
| Cunningham 2015 | Cross-sectional<br>33865 adults from the general US population                | Educational attainment (years of completed schooling)                                                                                                                                                                              | Sleep duration (<7, 7-8, >8 h)<br>Fatigue (yes vs no)<br>Excessive daytime sleepiness (yes vs no)<br>Insomnia (yes vs no)                               | Higher educational attainment was associated with less short sleep, less long sleep, less fatigue, less excessive daytime sleepiness and less insomnia                                                                                                                      | Among African Americans, higher educational attainment was associated with more short sleep.<br>Among Hispanics, higher educational attainment was associated with more short sleep, more long sleep, more fatigue, more excessive daytime sleepiness and more insomnia. Among Asians, higher educational |

|                   |                                                                                                                                                               |                                                                                                                                                                                                                                                                                                         |                                                                                                             |                                                                                                                                                                                           |                                                                                                                                                                                                                                                                                                                                                                                    |
|-------------------|---------------------------------------------------------------------------------------------------------------------------------------------------------------|---------------------------------------------------------------------------------------------------------------------------------------------------------------------------------------------------------------------------------------------------------------------------------------------------------|-------------------------------------------------------------------------------------------------------------|-------------------------------------------------------------------------------------------------------------------------------------------------------------------------------------------|------------------------------------------------------------------------------------------------------------------------------------------------------------------------------------------------------------------------------------------------------------------------------------------------------------------------------------------------------------------------------------|
| Ding 2015         | Cross-sectional<br>10901 adults $\geq 22$ y from<br>the general US population                                                                                 | Food security status (full, marginal, low,<br>very low)                                                                                                                                                                                                                                                 | Sleep duration (h)<br>Sleep latency (min)<br>Insomnia complaints (single<br>question, yes vs no)            | Food insecurity predicted shorter<br>sleep duration, longer sleep latency,<br>and more insomnia complaints                                                                                | attainment was associated<br>with more short sleep.<br>Adjusting for SES (income,<br>household size, race,<br>education level, marital<br>status, work schedule) and<br>health (BMI, poor mental<br>health, general health<br>condition, smoking status,<br>alcohol consumption, and<br>menopause status) variables<br>attenuated the differences in<br>sleep duration and latency |
| El-Sheikh<br>2015 | Cross-sectional<br>211 women recruited from<br>invitations sent through<br>their children's schools in<br>rural and semirural towns<br>in the Southeastern US | Income-to-needs ratio (computed by<br>dividing family income by the federal<br>poverty threshold for the same family<br>size)<br>Perceived economic well-being (latent<br>variable composed of 3 Conger scales:<br>can't make ends meet, material needs,<br>financial cutbacks)<br>Education (7 levels) | 1-week actigraphy (sleep<br>duration, sleep efficiency)<br>Subjective sleep problems<br>(PSQI global score) | Higher income-to-needs ratio is<br>associated with longer sleep duration.<br>Higher perceived economic well-<br>being and education is associated<br>with less subjective sleep problems. | Stress was a mediator<br>linking perceived economic<br>well-being with subjective<br>sleep problems                                                                                                                                                                                                                                                                                |
| Gamaldo<br>2015   | Cross-sectional<br>1207 adults 35-69y<br>members of a cohort from<br>the general population of<br>13 neighborhoods in<br>Baltimore, Maryland                  | Years of education<br>Family income (< vs >125% the poverty<br>threshold)                                                                                                                                                                                                                               | Sleep duration (<6h, 6-<br>7h, >7h)                                                                         | Lower levels of education were<br>associated with an increased<br>likelihood of reporting sleep durations<br><6h compared with greater than 7h                                            | Whites were more likely<br>than blacks to report sleep<br>durations <6h compared<br>with greater than 7h with<br>increasing education levels                                                                                                                                                                                                                                       |
| Katainen<br>2015  | Cross-sectional<br>3421 women 41-54 y<br>invited for a free<br>population-based<br>screening mammography<br>in Turku, Finland                                 | Educational level (low, intermediate,<br>high)<br>Employment status (employed,<br>unemployed, retired)                                                                                                                                                                                                  | Insomnia symptoms (three<br>questions from the<br>Women's Health<br>Questionnaire)                          | Higher educational level and<br>employment, protected against<br>insomnia symptoms                                                                                                        |                                                                                                                                                                                                                                                                                                                                                                                    |
| Kim 2015          | Cross-sectional<br>1924 adults $\geq 65$ y from the<br>general population in<br>Korea                                                                         | Education (no vs some)                                                                                                                                                                                                                                                                                  | Sleep duration (5h or less,<br>6h, 7h, 8h, 9h or more)                                                      | Formally educated subjects were less<br>likely to report sleeping for 8h or<br>more                                                                                                       |                                                                                                                                                                                                                                                                                                                                                                                    |

|                 |                                                                                                                                      |                                                                                                                                                                                                                       |                                                                                                                                                                                                                                            |                                                                                                                                                                         |
|-----------------|--------------------------------------------------------------------------------------------------------------------------------------|-----------------------------------------------------------------------------------------------------------------------------------------------------------------------------------------------------------------------|--------------------------------------------------------------------------------------------------------------------------------------------------------------------------------------------------------------------------------------------|-------------------------------------------------------------------------------------------------------------------------------------------------------------------------|
| Kurina 2015     | Cross-sectional<br>739 adults 62-90 y from the general US population                                                                 | Educational attainment (less than high school degree, high school degree or some college, bachelor's degree or more)<br>Household income (5 levels)<br>Household assets (5 levels)                                    | 3-day actigraphy (total sleep time, WASO, time in bed, sleep percentage, sleep fragmentation)                                                                                                                                              | Those with higher education had less WASO and time in bed and, thus, higher sleep percentage                                                                            |
| Nisar 2015      | Cross-sectional<br>3062 women 40-70y from the general population in Matiary district of Sindh province, Pakistan                     | Education (no formal education, 5y, 8y, 10y, 12y and above)<br>Employment (housewife, farmer, labourer, servant, others)<br>Family SES (poor, middle class, upper class, based on husband's occupation)               | Insomnia item on Menopause Rating Scale                                                                                                                                                                                                    | There was no significant association between insomnia and education, occupation, or family SES                                                                          |
| Patel 2015      | Cross-sectional<br>11860 adults 18-74 y from the general population of Hispanic/Latino ethnicity in four major US metropolitan areas | Household income (5 levels)<br>Level of education (<high school, high school graduate, >high school)<br>Employment status (retired, unemployed, employed part-time, employed full-time)<br>Home ownership (yes vs no) | Self-reported sleep duration (<7, 7-9, >9 h)                                                                                                                                                                                               | Low education was associated with both short and long sleep duration. Retired and unemployed were more likely to be long sleepers and less likely to be short sleepers. |
| Peltzer 2015    | Cross-sectional<br>20222 university students 16-30y from 26 countries                                                                | Perceived family wealth status (within the highest 25% in country, within the 50 to 75% range for their country, within the 25 to 50% range from country, within the lowest 25% in their country)                     | Insomnia symptoms (single question, severe/extreme problem vs less)                                                                                                                                                                        | Lower wealth status was associated with more severe insomnia symptoms                                                                                                   |
| Schwartz 2015   | Cross-sectional<br>2682 adults >35 y from the general population of 4 Peruvian settings                                              | Wealth index (based on current occupation, household income, assets and household facilities)                                                                                                                         | SDB symptoms: habitual snoring (self-reported snoring at least 3 nights per week); observed apneas (pauses in breathing or choking during sleep reported by a spouse or bed partner); excessive daytime sleepiness (modified ESS score >6) | Lower SES was associated with less habitual snoring but more excessive daytime sleepiness.                                                                              |
| Sivertsen 2015  | Cross-sectional<br>9338 adolescents 16-19 y from the general population in Hordaland county, Norway                                  | Parental education (primary school, secondary school, college/university)<br>Perceived family economy (better, approximately like most others, poorer)                                                                | DSPD ICSD-2 criteria (questionnaire)                                                                                                                                                                                                       | Low paternal education and poorer family economy were associated with DSPD                                                                                              |
| Stringhini 2015 | Cross-sectional                                                                                                                      | Educational level (high, middle, low)<br>Occupational position (high, middle, low)                                                                                                                                    | Subjective sleep assessment: sleep quality                                                                                                                                                                                                 | Men not employed full time were more likely to have longer sleep                                                                                                        |

|                    |                                                                                            |                                                                                                                                                                                                                                                                                                                                                                                   |                                                                                                                                                                                                                                                                                                                       |                                                                                                                                                                                                                                                                                                                                                                                                                                                                                                                                                                                            |                                                                                                                                                                                                                                                             |
|--------------------|--------------------------------------------------------------------------------------------|-----------------------------------------------------------------------------------------------------------------------------------------------------------------------------------------------------------------------------------------------------------------------------------------------------------------------------------------------------------------------------------|-----------------------------------------------------------------------------------------------------------------------------------------------------------------------------------------------------------------------------------------------------------------------------------------------------------------------|--------------------------------------------------------------------------------------------------------------------------------------------------------------------------------------------------------------------------------------------------------------------------------------------------------------------------------------------------------------------------------------------------------------------------------------------------------------------------------------------------------------------------------------------------------------------------------------------|-------------------------------------------------------------------------------------------------------------------------------------------------------------------------------------------------------------------------------------------------------------|
|                    | 3391 adults 40-81 y from the general population in Lausanne, Switzerland                   | Employment status (employed full time/not)                                                                                                                                                                                                                                                                                                                                        | (PSQI global score >5), sleep latency (>30 min), daytime sleepiness (ESS score >10), sleep duration (<5 h), insomnia (from 2 items in PSQI)<br>Objective sleep assessment: total sleep time, sleep latency, slow wave sleep, sleep efficiency, stage shifts (in-home 1-night PSG in a subsample of 1569 participants) | latency. Men with a low educational level or occupational position were more likely to suffer from poor sleep quality, short sleep duration, and insomnia. Men with a low occupational position were also more likely to have long sleep latency. Women with a low educational level were more likely to have long sleep latency and short sleep duration. Women with a low occupational position were more likely to have long sleep latency, excessive daytime sleepiness and short sleep duration. Participants with low SES had lower sleep efficiency and higher stage shifts in PSG. |                                                                                                                                                                                                                                                             |
| Suarez 2015        | Cross-sectional<br>4144 adults 30-79 y from the general population in Boston               | Annual household income per resident (<\$6000, \$6000-\$30000, >\$30000)<br>Education level (less than high school, high school diploma, some college, college diploma, post-college education)<br>Employment status (working for pay full-time, working for pay part-time, other employment, unemployed)                                                                         | Self-reported sleep duration (<7, 7-8, >8 h), sleep latency (in minutes), restless sleep (yes vs no), sleep apnea risk (Berlin questionnaire)                                                                                                                                                                         | Lower education was associated with short sleep and unemployment with long sleep. Lower education and unemployment predicted longer sleep latency. Lower income and unemployed individuals were more likely to report restless sleep. Lower education was associated with greater sleep apnea risk.                                                                                                                                                                                                                                                                                        | The results were attenuated after adjustment for lifestyle, behavioral and health factors (smoking, alcohol consumption, physical activity, BMI, depression or antidepressant use, perceived stress, self-rated health status, use of sedating medications) |
| van de Straat 2015 | Cross-sectional<br>54722 adults >50 y from the general population of 16 European countries | Highest level of education (no education, primary, lower secondary, upper secondary, post-secondary non-tertiary, tertiary)<br>Current job situation (retired, employed or self-employed, unemployed, permanently sick or disabled, homemaker)<br>Household net worth (incorporating the sum of the real assets, net of any debts, and the net financial assets of the household) | Self-reported sleep problems (single question, yes vs no)                                                                                                                                                                                                                                                             | A higher level of education and a higher household net worth were associated with less sleep problems. Employed individuals and homemakers reported less sleep problems while permanently sick or disabled reported more sleep problems than retired individuals.                                                                                                                                                                                                                                                                                                                          |                                                                                                                                                                                                                                                             |

|                        |                                                                                                                           |                                                                                                                                                                                                                                                                                                   |                                                                                                                                     |                                                                                                                                                                                                               |
|------------------------|---------------------------------------------------------------------------------------------------------------------------|---------------------------------------------------------------------------------------------------------------------------------------------------------------------------------------------------------------------------------------------------------------------------------------------------|-------------------------------------------------------------------------------------------------------------------------------------|---------------------------------------------------------------------------------------------------------------------------------------------------------------------------------------------------------------|
| Yoon 2015              | Cross-sectional<br>84094 adults 40-69y<br>recruited from health<br>examination centers and<br>training hospitals in Korea | Education (middle school or below, high<br>school graduate, college or above)<br>Occupation (non-manual, manual,<br>unemployed)                                                                                                                                                                   | Sleep duration (<6h, 6–7h,<br>8–9h, ≥10h)                                                                                           | Both short and long sleep duration<br>were associated with having the<br>lowest education attainment and<br>having a manual job                                                                               |
| Zapata<br>Roblyer 2015 | Cross-sectional<br>91 adolescents 11-19y<br>from public schools in<br>Tulsa, Oklahoma                                     | Family income (less than \$29,000,<br>\$30,000–\$44,999, \$45,000–\$59,999,<br>\$60,000 and more)                                                                                                                                                                                                 | PSQI sleep duration, sleep<br>latency, and sleep<br>disturbance components                                                          | Family income was not associated<br>with sleep outcomes                                                                                                                                                       |
| Danielsson<br>2016     | Cross-sectional<br>671 subjects 16-26y from<br>the general population in<br>Uppsala, Sweden                               | Employment status (attending educational<br>activity or work vs no educational activity<br>or work or on sick leave)                                                                                                                                                                              | Delayed sleep phase<br>disorder (DSM-5 criteria)                                                                                    | Not attending any educational or<br>work activity was significantly<br>associated to DSPD                                                                                                                     |
| de Jong 2016           | Cross-sectional<br>90 children 33-71 months<br>from 17 preschools in<br>western Massachusetts                             | Household income (8 levels)                                                                                                                                                                                                                                                                       | Parent-reported sleep<br>problems (Child Sleep<br>Habits Questionnaire)<br>Sleep duration and<br>variability (15-day<br>actigraphy) | Children in lower income homes were<br>likely to have more inconsistent sleep<br>schedules. There was no association<br>between household income and<br>children's sleep problems or total<br>sleep duration. |
| de Ruiter<br>2016      | Cross-sectional<br>24857 children 2-14 y<br>from the general<br>population of Spain                                       | Highest education level achieved by the<br>head of the household (illiterate/primary<br>level, secondary level and non-university,<br>university education)                                                                                                                                       | Parent-reported sleep<br>duration (short sleep based<br>on age)                                                                     | Lower parental education was<br>associated with short children sleep                                                                                                                                          |
| Hawkins<br>2016        | Cross-sectional<br>196990 children 6-17y<br>from the general US<br>population                                             | Highest education in the household<br>(<high school, high school, >high school)<br>Household poverty level (0-99% FPL,<br>100-199% FPL, 200-299% FPL, 300-<br>399% FPL, ≥400% FPL)<br>Employment status (anyone in household,<br>yes vs no)<br>Insurance status (none, Medicaid/CHIP,<br>private) | Parent-reported sleep<br>inadequacy (no vs yes)                                                                                     | Among 10-17-year-olds higher<br>household education, income and<br>private insurance was associated with<br>sleep inadequacy                                                                                  |
| Heshmat<br>2016        | Cross-sectional<br>13486 children and<br>adolescents 6-18 y from<br>the general population in<br>Iran                     | Family SES determined by principle<br>component analysis method including<br>parents' education, occupation,<br>possessing a private car, school type<br>(public vs private), home type (private vs<br>rented) and having a personal computer at<br>home (total score was a weighted average      | Insomnia problems (single<br>question from the WHO-<br>Global School Based<br>Student Health Survey<br>questionnaire)               | Odds for insomnia were lower in<br>students with high SES compared to<br>low SES                                                                                                                              |



|              |                                                                                                                                                                      |                                                                                                                                                                                                                                                                                                                                                    |                                                                                                                                                                                                  |                                                                                                                                                                                                                                                                                            |                                                                                                                                              |
|--------------|----------------------------------------------------------------------------------------------------------------------------------------------------------------------|----------------------------------------------------------------------------------------------------------------------------------------------------------------------------------------------------------------------------------------------------------------------------------------------------------------------------------------------------|--------------------------------------------------------------------------------------------------------------------------------------------------------------------------------------------------|--------------------------------------------------------------------------------------------------------------------------------------------------------------------------------------------------------------------------------------------------------------------------------------------|----------------------------------------------------------------------------------------------------------------------------------------------|
|              |                                                                                                                                                                      | of the SES variables and was categorised into low, middle and high)                                                                                                                                                                                                                                                                                |                                                                                                                                                                                                  |                                                                                                                                                                                                                                                                                            |                                                                                                                                              |
| Johnson 2016 | Cross-sectional<br>5215 African Americans<br>21-95 y recruited from<br>lists and advertisements in<br>3 counties in the Jackson<br>metropolitan area,<br>Mississippi | Education (less than high school, high<br>school, greater than high school but less<br>than a college degree, college degree or<br>more)<br>Annual family income (classified as low,<br>lower-middle, upper-middle and affluent,<br>based upon income, family size, number<br>of children <18 years and the US Census<br>designated poverty level) | Sleep duration ( $\leq 6$ , 7-8, $\geq 9$<br>h)<br>Sleep quality (single<br>question, excellent/very<br>good/good vs fair/poor)                                                                  | Lower income and lower education<br>categories were associated with<br>higher odds of long sleep and poorer<br>sleep quality                                                                                                                                                               | After adjustment for<br>depressive symptoms, the<br>associations were attenuated<br>but remained statistically<br>significant for long sleep |
| Malone 2016  | Cross-sectional<br>439933 adults 40-69y<br>from the general UK<br>population                                                                                         | Education (attended college, yes/no)<br>Employment status (employed, non-<br>employed, retired)                                                                                                                                                                                                                                                    | Sleep duration (<5h, 5-6h,<br>7-8h, >8h)                                                                                                                                                         | Lower education and unemployment<br>were associated with less short and<br>long sleep. Retirement was associated<br>with less short and more long sleep<br>than being employed                                                                                                             |                                                                                                                                              |
| Paine 2016a  | Cross-sectional<br>4330 adults 20-59 y from<br>the general population in<br>New Zealand                                                                              | Employment status (employed with no<br>night work, employed with night work,<br>unemployed)                                                                                                                                                                                                                                                        | Self-reported sleep<br>duration: short sleep (<7 h),<br>long sleep (>8 h),<br>insufficient sleep (extension<br>of sleep duration by >2<br>hours on free days<br>compared with scheduled<br>days) | The odds of reporting insufficient<br>sleep were higher for those employed<br>in night work and lower for the<br>unemployed. The odds of reporting<br>short sleep were higher for night<br>workers and unemployed. The<br>likelihood of reporting long sleep was<br>higher for unemployed. |                                                                                                                                              |
| Paine 2016b  | Cross-sectional<br>10369 adults from the<br>general population in New<br>Zealand                                                                                     | Education (tertiary, some secondary, no<br>secondary qualification)<br>Equivalized household income (low,<br>middle, high tertiles)                                                                                                                                                                                                                | Difficulty falling asleep,<br>frequent nocturnal<br>awakenings, early morning<br>awakenings (all/most of the<br>time vs a good bit/some/a<br>little/none of the time)                            | Difficulty falling asleep and frequent<br>nocturnal awakenings were more<br>likely among those with less than a<br>secondary school education. Being in<br>the highest household income tertile<br>was associated with a lower<br>likelihood of reporting early morning<br>awakenings.     |                                                                                                                                              |
| Peltzer 2016 | Cross-sectional<br>19417 university students<br>16-30y from 26 countries                                                                                             | Perceived family wealth status (within the<br>highest 25% in country, within the 50 to<br>75% range for their country, within the 25<br>to 50% range from country, within the<br>lowest 25% in their country)                                                                                                                                      | Sleep duration ( $\leq 6$ h, 7-8h,<br>$\geq 9$ h)                                                                                                                                                | Family economic background was not<br>associated with short or long sleep                                                                                                                                                                                                                  |                                                                                                                                              |
| Peña 2016    | Cohort                                                                                                                                                               | Maternal education (<college graduate vs<br>$\geq$ college graduate)                                                                                                                                                                                                                                                                               | Sleep curtailment score<br>(based on mean daily sleep)                                                                                                                                           | Lower maternal educational<br>attainment and household income                                                                                                                                                                                                                              | Environmental and<br>behavioral characteristics                                                                                              |

|                 |                                                                                                                                      |                                                                                                                                       |                                                                                                              |                                                                                                                               |                                                                                                                    |
|-----------------|--------------------------------------------------------------------------------------------------------------------------------------|---------------------------------------------------------------------------------------------------------------------------------------|--------------------------------------------------------------------------------------------------------------|-------------------------------------------------------------------------------------------------------------------------------|--------------------------------------------------------------------------------------------------------------------|
|                 | 1288 children of women recruited during early pregnancy from a multi-specialty group practice in Massachusetts and followed until 7y | Annual household income (<\$40000, \$40000-\$70000, >\$70000)                                                                         | duration at each of the 8 measurement times using sleep duration thresholds from the literature, range 0-13) | were associated with higher chronic sleep curtailment                                                                         | (maternal smoking status, child TV/video viewing, active play, breastfeeding) partially mediated the relationships |
| Safak 2016      | Cross-sectional<br>665 adults ≥60y from 21 family health centers in the urban areas of Kayseri province, Turkey                      | Education (illiterate, literate, 1–8 years, >8 years)<br>Income level (high, medium, low)                                             | Restless leg syndrome (2003 International RLS Study Group criteria)                                          | No association was found between SES and RLS diagnosis                                                                        |                                                                                                                    |
| Schäfer 2016    | Cross-sectional<br>4106 adolescents 18y members of a population-based birth cohort in Pelotas, Brazil                                | Family income at birth and at 18y (in quintiles)<br>Maternal schooling at birth (0, 1-4, 5-8, 9-11, ≥12y)                             | Self-reported sleep duration                                                                                 | Lower maternal schooling and lower family income was associated with higher sleep duration                                    |                                                                                                                    |
| Seyedmehdi 2016 | Cross-sectional<br>715 staff employees of a hospital in Tehran, Iran                                                                 | Education (undergraduate vs graduate or postgraduate)                                                                                 | OSA risk (Berlin questionnaire, high vs low risk)                                                            | There was no association between education and OSA risk                                                                       |                                                                                                                    |
| Smagula 2016    | Cohort<br>8265 adults ≥60y from the general Chinese population in Singapore followed for 13y                                         | Educational attainment (none, primary school, secondary school, junior college, university/technical school)                          | Sleep duration (<6h, 6-8h, >8h)                                                                              | Educational attainment was inversely related to odds of becoming a long sleeper                                               |                                                                                                                    |
| Tareque 2016    | Cross-sectional<br>1002 adults from the general population of five prefectures in Japan                                              | Years of schooling                                                                                                                    | Insomnia symptoms severity (none, mild, moderate, severe, extreme)                                           | No statistically significant association between years of schooling and insomnia symptoms was found                           |                                                                                                                    |
| Wong 2016       | Cross-sectional<br>12784 adults, part of an already established cohort, from the general population in Tangshan, China               | Educational level (primary, middle, college)<br>Income level (<600 RMB, 600-1000 RMB, >1000 RMB)<br>Occupation (white vs blue collar) | REM sleep behavior disorder questionnaire                                                                    | Lower level of education and blue collar occupation were significantly associated with higher risk of having RBD              |                                                                                                                    |
| Abraham 2017    | Cross-sectional<br>1015 adults ≥60y members of a community registry in Pittsburgh, Pennsylvania                                      | Education (more than 4-year college degree, some college/4-year college degree, HS degree/GED or less)                                | Sleep quality (single question, very satisfied/satisfied/neutral vs dissatisfied/very dissatisfied)          | The likelihood of reporting poor satisfaction with sleep was lower among participants with some college/4-year college degree |                                                                                                                    |

|                 |                                                                                                                                                        |                                                                                                                                                                                                                                                |                                                                                                     |                                                                                                                                                                                                           |                                                                                                                                                                                                                          |
|-----------------|--------------------------------------------------------------------------------------------------------------------------------------------------------|------------------------------------------------------------------------------------------------------------------------------------------------------------------------------------------------------------------------------------------------|-----------------------------------------------------------------------------------------------------|-----------------------------------------------------------------------------------------------------------------------------------------------------------------------------------------------------------|--------------------------------------------------------------------------------------------------------------------------------------------------------------------------------------------------------------------------|
|                 |                                                                                                                                                        |                                                                                                                                                                                                                                                |                                                                                                     | compared to more than 4-year college degree                                                                                                                                                               |                                                                                                                                                                                                                          |
| Ahmed 2017      | Cross-sectional<br>2095 adults recruited from blood bank donors, pre-employment clinics, visitors, and employees of a hospital in Riyadh, Saudi Arabia | Education (non-educated, elementary, intermediate, high school, university)<br>Employment status (employed, housewife, student, unemployed)                                                                                                    | Insomnia (ICSD-2 criteria)                                                                          | There was a significant relationship among insomnia and lower education                                                                                                                                   |                                                                                                                                                                                                                          |
| Assari 2017     | Cohort<br>37495 adults >50 y from the general US population followed for 6 years                                                                       | Years of education<br>Total household income                                                                                                                                                                                                   | Sustained insomnia symptoms (4-symptom mean score assessed in 3 waves and creating a latent factor) | Higher education and income were associated with lower levels of sustained insomnia symptoms                                                                                                              | The association between education and sustained insomnia was non-significant for black men                                                                                                                               |
| Bapat 2017      | Cross-sectional<br>268 5 <sup>th</sup> -9 <sup>th</sup> grade adolescents from two public and four private schools in Pune, India                      | 4-item Family Affluence Scale (divided in 3 categories)                                                                                                                                                                                        | Self-reported sleep time                                                                            | Children with a higher SES slept shorter than children with a lower SES                                                                                                                                   | This relation was significantly mediated by screen time (low SES children reported more screen time and thus less sleep time) and academic work (high SES children reported more academic work and thus less sleep time) |
| Barazzetta 2017 | Cohort<br>13978 children recruited at birth and followed up to 9 y from the general population in Avon, UK                                             | Mother's education level (cse/none, vocational, O-level, A-level, university degree)<br>Net household income per week (averaged over 4 waves and divided in quartiles)<br>Material deprivation index (8 items, range 0-8, divided in 0, 1, >1) | Parent-reported sleep quality (at least one of six sleep problems) and duration                     | Higher material deprivation, lower maternal education and family income were associated with higher odds of reporting at least one sleep problem but neither showed significant effects on sleep duration |                                                                                                                                                                                                                          |
| Brambilla 2017  | Cross-sectional<br>1977 children 1-14y recruited from 72 family paediatricians in Italy                                                                | Maternal education (high school or university degree vs less)                                                                                                                                                                                  | Parent-reported optimal sleep (sleeping in own bed all night without awakenings)                    | Optimal sleeper condition was positively associated with mother's high education level                                                                                                                    |                                                                                                                                                                                                                          |
| Cheng 2017      | Cohort                                                                                                                                                 | Education level (none, primary, secondary, vocational/junior college/polytechnic/university)                                                                                                                                                   | Sleep duration ( $\leq 4$ , 5, 6, 7 - 8, $\geq 9$ h)                                                | Higher education level was associated with lower risks for short sleep                                                                                                                                    |                                                                                                                                                                                                                          |

|                |                                                                                                   |                                                                                                                                                                                                                                                 |                                                                                       |                                                                                                       |                                                                                                                           |
|----------------|---------------------------------------------------------------------------------------------------|-------------------------------------------------------------------------------------------------------------------------------------------------------------------------------------------------------------------------------------------------|---------------------------------------------------------------------------------------|-------------------------------------------------------------------------------------------------------|---------------------------------------------------------------------------------------------------------------------------|
|                | 2653 adults ≥60y from the general population in Singapore followed for 2y                         | Housing type (1–2 room public, 3 room public, ≥4 room public/ private)                                                                                                                                                                          |                                                                                       |                                                                                                       |                                                                                                                           |
| Clark 2017     | Cross-sectional<br>7835 women 31-36y and 59-64y from two general population cohorts in Australia  | Occupation (manager/professional, clerical/sales, trades/production/labourer)                                                                                                                                                                   | Sleep duration<br>Short sleep (≤6h/day vs >6h/day)<br>Long sleep (≥8h/day vs <8h/day) | In the young cohort, trades/production/labourers slept less than other occupational categories        |                                                                                                                           |
| Costanian 2017 | Cross-sectional<br>3675 toddlers 1-2y from the general population in Canada                       | Household income (<\$30,000, \$30,000 – <\$60,000, \$60,000 – <\$100,000, ≥\$100,000)<br>Mother's work status (currently working vs not currently working)<br>Mother's education level (college graduate or less vs more than college graduate) | Parent-reported sleep duration (<11h vs more)                                         | Toddlers who came from a household with higher annual income were less likely to sleep <11h per night |                                                                                                                           |
| Didriksen 2017 | Cross-sectional<br>12822 blood donors 18-67 y in Denmark                                          | Employment status (employed/student vs unemployed)<br>Education (≤high school/vocational course vs ≥short-length higher education)<br>Income (<median vs ≥median earnings)                                                                      | Cambridge-Hopkins RLS-questionnaire                                                   | Men with lower education were more likely to suffer from RLS                                          |                                                                                                                           |
| Foroughi 2017  | Cross-sectional<br>4021 adults from the general population in Tehran, Iran                        | Educational level (illiterate, high school or less, university degree or higher)                                                                                                                                                                | OSA risk (Stop-Bang questionnaire)                                                    | Education did not have any significant effect on OSA risk                                             |                                                                                                                           |
| Fulgencio 2017 | Cross-sectional<br>1344 adolescents 13-15 y from 14 public and private schools in Itabira, Brazil | Composite variable (goods owned by the family and educational level of its head, categorized as higher vs lower)                                                                                                                                | Parent-reported possible sleep bruxism (single question, yes vs no)                   | Greater prevalence of possible sleep bruxism was observed among adolescents from a higher SES         |                                                                                                                           |
| Grandner 2017  | Cross-sectional<br>20497 adults from the general US population                                    | Education level (college graduate, some college, high school, less than high school)<br>Employment status (yes vs no)                                                                                                                           | Nocturnal leg cramps frequency (none, mild, moderate-severe)                          | Non-college graduates and unemployed had a higher likelihood of nocturnal leg cramps                  | Adjusting for sleep symptoms, medical history, and physiologic health markers attenuated the effects of employment status |
| Ham 2017       | Cross-sectional<br>423 women 40-65y recruited from                                                | Monthly family income (≤2.4 million won vs >2.4 million won)<br>Education (middle school or less vs high school or above)                                                                                                                       | Insomnia (ISI score)<br>Sleep quality (PSQI global score)                             | Lower education level was positively associated with the ISI score                                    |                                                                                                                           |

|               |                                                                                                                                              |                                                                                                                                                |                                                                                                                 |                                                                                                                                                                          |
|---------------|----------------------------------------------------------------------------------------------------------------------------------------------|------------------------------------------------------------------------------------------------------------------------------------------------|-----------------------------------------------------------------------------------------------------------------|--------------------------------------------------------------------------------------------------------------------------------------------------------------------------|
|               | advertisements in Incheon, Korea                                                                                                             | Employment status (yes vs no)                                                                                                                  |                                                                                                                 |                                                                                                                                                                          |
| Hardy 2017    | Cross-sectional<br>7555 children 5-16 y from the general population in New South Wales, Australia                                            | Area index (based on post codes and divided in tertiles)                                                                                       | Self-reported sleep duration (adherence to recommendation according to age)                                     | There was no difference in adherence between high and low SES children                                                                                                   |
| Kim 2017      | Cross-sectional<br>509 adults ≥60y from the general population in “Y”-myeon, Ganghwa-gun, Korea                                              | Education level (≥7 years vs 0–6 years)<br>Perceived economic status (fair vs poor)                                                            | Insomnia symptoms                                                                                               | Low education level was associated with insomnia symptoms                                                                                                                |
| Koolhaas 2017 | Cross-sectional<br>1120 adults 70-94y from the general population of the Ommoord district in Rotterdam, Netherlands                          | Education (primary, lower, intermediate, higher)                                                                                               | Sleep duration (1-week accelerometer and sleep diary)                                                           | Education was not associated with sleep duration                                                                                                                         |
| Ma JF 2017    | Cross-sectional<br>3635 adults >50 y recruited by telephone notifications and posted advertisements in Wuliqiao Community of Shanghai, China | Occupation (mental vs labour)<br>Level of education (illiterate, primary school, junior high school, senior high school, university or higher) | RBD screening questionnaire score ≥5                                                                            | Higher education was associated with lower risk of having probable RBD                                                                                                   |
| Ma Y 2017     | Cross-sectional<br>1825 adolescents 11-18y from 6 middle schools in Changchun City, China                                                    | Highest parental education (primary school or low, junior high school, senior high school, university and above)                               | Parent-reported snoring (more than half the time while sleeping)                                                | Parental education of a university degree and above was a protecting factor for snoring                                                                                  |
| Maume 2017    | Cohort<br>974 adolescents 12y members of a birth cohort from 24 hospitals of 10 US cities followed for 3y                                    | Income-to-needs ratio (ratio of total family income to Census-defined poverty threshold)                                                       | Self-reported sleep duration                                                                                    | Improvement in family income-to-needs is associated with longer sleep at age 15                                                                                          |
| McDowall 2017 | Cross-sectional<br>115 children 2-12y attending inpatient or day wards of a children's hospital in Wellington, New Zealand                   | Parental education (6 levels)<br>Household income (5 levels)                                                                                   | Parent-reported sleep latency, sleep duration, and sleep problems (Children's Sleep Habits Questionnaire score) | Parents from homes with higher annual income were more likely to report shorter sleep latencies and fewer sleep problems. Parents with higher education reported shorter |

|                  |                                                                                                                                                                                      |                                                                                                                                                                                                                                                                                                                                                                                                                                                                                         |                                                                                                                                                                                 |                                                                                                                                                                                                                                                      |                                                                                           |
|------------------|--------------------------------------------------------------------------------------------------------------------------------------------------------------------------------------|-----------------------------------------------------------------------------------------------------------------------------------------------------------------------------------------------------------------------------------------------------------------------------------------------------------------------------------------------------------------------------------------------------------------------------------------------------------------------------------------|---------------------------------------------------------------------------------------------------------------------------------------------------------------------------------|------------------------------------------------------------------------------------------------------------------------------------------------------------------------------------------------------------------------------------------------------|-------------------------------------------------------------------------------------------|
| Mota-Veloso 2017 | Cross-sectional<br>851 children 6-12 y from seven public and two private schools in Diamantina, Brazil                                                                               | Composite variable of 3 indicators: equalized household income (10 levels), mother's and father's schooling (9 levels)                                                                                                                                                                                                                                                                                                                                                                  | Sleep bruxism (reports of parents/caregivers and oral clinical evaluation)                                                                                                      | weekday sleep latencies.<br>Lower SES was associated with more sleep bruxism                                                                                                                                                                         | The effect was mediated by sucking behavior (finger sucking, nails or other objects bite) |
| Netsi 2017       | Cohort<br>3842 infants recruited at birth in Pelotas, Brazil and evaluated at 3, 12, 24, and 48 months                                                                               | Maternal education (0-4 years, 5-8 years, ≥9 years)<br>Family income (in quintiles)                                                                                                                                                                                                                                                                                                                                                                                                     | Parent-reported sleep duration, awakenings, and sleep disturbances (nightmares/night terrors, restless sleep, difficulty going to sleep, wakes up at night, and wakes up early) | Maternal education and family income were not associated with infant sleep duration or disturbances                                                                                                                                                  |                                                                                           |
| Palmer 2017      | Cross-sectional<br>8067 adults 50-64y recruited from 24 general practices in England                                                                                                 | Educational level (university degree or higher professional, vocational training certificate, school only)<br>Occupational class (higher managerial, intermediate, manual and routine)<br>Home ownership (owned/owned with a mortgage vs other)<br>Pension entitlement (state pension only vs private pension)<br>Financial hardship (two items on difficulty managing financially and on many things being unaffordable)<br>Work status (employed, self-employed, unemployed, retired) | Insomnia symptoms (no/mild/moderate problem vs severe problem)                                                                                                                  | Insomnia was more common among the less educated, those of lower social class, and the unemployed and was associated with lack of home ownership, lack of a private pension, and reported difficulties in managing financially and affording things) |                                                                                           |
| Patte 2017       | a) Cross-sectional<br>b) Cohort<br>36088 (a) and 7394 (b, followed for 2y) adolescents 9 <sup>th</sup> -12 <sup>th</sup> grade from secondary schools in Ontario and Alberta, Canada | School area average income (median household income of census divisions that corresponded with school postal codes according to data from the 2011 National Household Survey)                                                                                                                                                                                                                                                                                                           | a) Short sleep duration (<8h)<br>b) Sleep duration trajectories (short, low-normal, high-normal, long)                                                                          | a) Sufficient sleep was more likely among students attending schools in areas classified in the highest SES group<br>b) Attending schools in low-income areas predicted short and low-normal sleep duration trajectories over time                   |                                                                                           |
| Perales 2017     | Cross-sectional<br>9181 adults 20-70y from the general population of Australia                                                                                                       | Education (degree or higher, professional qualification or secondary school, below secondary school)                                                                                                                                                                                                                                                                                                                                                                                    | Sleep duration                                                                                                                                                                  | Lower education, material deprivation and lack of prosperity were associated with shorter sleep duration, while                                                                                                                                      |                                                                                           |

|                |                                                                                                            |                                                                                                                                                                                                                                                                                                                                                                                         |                                                                              |                                                                                                                                                                                            |
|----------------|------------------------------------------------------------------------------------------------------------|-----------------------------------------------------------------------------------------------------------------------------------------------------------------------------------------------------------------------------------------------------------------------------------------------------------------------------------------------------------------------------------------|------------------------------------------------------------------------------|--------------------------------------------------------------------------------------------------------------------------------------------------------------------------------------------|
|                |                                                                                                            | <p>Employment status (full-time, part-time, self-employed, unemployed, full-time student)</p> <p>House tenure (owned outright, mortgage, rental)</p> <p>Material deprivation (yes vs no)</p> <p>Lack of prosperity (poor/very poor vs other)</p> <p>Financial worsening (one of last year's major life events)</p> <p>Income poverty (annual income below 60% of the sample median)</p> |                                                                              | unemployment with longer sleep duration                                                                                                                                                    |
| Seo 2017       | Cross-sectional<br>1608 adolescents 12-18 y from the general population in Korea                           | <p>Household income (calculated by dividing household monthly income by the square root of the number of people in the household and divided in quartiles)</p> <p>Recipient of national basic livelihood security (current/past vs never)</p> <p>National Health Insurance (employees of corporation, self-employed, Medicaid)</p>                                                      | Self-reported sleep duration                                                 | Sleep duration was shorter in the highest income quartile                                                                                                                                  |
| Sivertsen 2017 | Cross-sectional<br>8873 adolescents 16-19 y from the general population in the county of Hordaland, Norway | Latent class analysis to identify patterns of family income across previous 7 years (never poor, moving out of poverty, moving into poverty, chronically poor)                                                                                                                                                                                                                          | Self-reported sleep duration, sleep onset latency, WASO and sleep efficiency | Adolescents from families experiencing worsening in their family income reported significantly shorter sleep duration, longer WASO, and lower sleep efficiency than those being never poor |
| Tang 2017      | Cross-sectional<br>25827 subjects $\geq 12$ y from the general population of Hunan Province, China         | Years of education                                                                                                                                                                                                                                                                                                                                                                      | Sleep quality (PSQI global score $> 5$ )                                     | Higher educational level was associated with poor sleep quality                                                                                                                            |
| Walsemann 2017 | Cohort<br>8473 adults 18-22y members of a general US population cohort followed for 9y                     | <p>Enrollment status (not enrolled in college, enrolled in college, enrolled in graduate school)</p> <p>Highest degree attained (no degree, GED, high school diploma, associate's degree, bachelor's degree or higher)</p> <p>Employment status (no, part-time, full-time)</p>                                                                                                          | Sleep duration                                                               | Individuals enrolled in college or graduate school and working part- or full-time reported lower decreases in sleep duration over time than those not enrolled in college and not working  |

|              |                                                                                                                  |                                                                                                                                                                                                                                                                                                               |                                                                                                                           |                                                                                                                                                                                                                                                                                                                                      |
|--------------|------------------------------------------------------------------------------------------------------------------|---------------------------------------------------------------------------------------------------------------------------------------------------------------------------------------------------------------------------------------------------------------------------------------------------------------|---------------------------------------------------------------------------------------------------------------------------|--------------------------------------------------------------------------------------------------------------------------------------------------------------------------------------------------------------------------------------------------------------------------------------------------------------------------------------|
| Wang 2017    | Cross-sectional<br>17320 adults 18-79y from the general population in Jilin Province, China                      | Education ( $\leq 9$ y vs $> 9$ y)<br>Household's monthly income per person ( $< 1,000$ yuan, 1,000–2,999 yuan, $> 3,000$ yuan)                                                                                                                                                                               | Sleep duration ( $< 7$ h, 7-9h, $> 9$ h)                                                                                  | Lower education was negatively associated with long sleep                                                                                                                                                                                                                                                                            |
| Yu 2017      | Cross-sectional<br>1049 children 0-36 months recruited from mailing lists and online advertisements in Hong Kong | Parental employment status (employed full-time, employed part-time, on maternity leave, homemaker/at-home parent, student, unemployed/in-between jobs or other)<br>Parental education (high school or below, college, postgraduate)                                                                           | Parent-reported sleep duration (Brief Infant Sleep Questionnaire)                                                         | Children whose mothers had a part-time job or were not employed had longer sleep duration                                                                                                                                                                                                                                            |
| Yunus 2017   | Cross-sectional<br>1648 adults $\geq 60$ y from the general population in Kuala Pilah district, Malaysia         | Monthly household income (less than RM1000, RM1000-RM2499, RM2500 and above).<br>Education level (no formal education, primary to secondary, college and above)                                                                                                                                               | Sleep quality (PSQI global score)                                                                                         | Those with lower income had poorer sleep                                                                                                                                                                                                                                                                                             |
| Zhang 2017   | Cross-sectional<br>1563 adults $\geq 45$ y from the general population in Dongguan city, China                   | Education (senior middle school or higher, junior middle school, elementary school or lower)                                                                                                                                                                                                                  | Sleep quality (PSQI global score $> 5$ )                                                                                  | Participants with lower education had a higher risk of poor sleep                                                                                                                                                                                                                                                                    |
| Berhanu 2018 | Cross-sectional<br>422 adults from the general population in Jimma Town, Ethiopia                                | Educational status (no formal education, primary education, secondary and above)<br>Monthly income ( $> 1000$ ETB vs $\leq 1000$ ETB)                                                                                                                                                                         | Sleep quality (PSQI global score $> 5$ )                                                                                  | Subjects with monthly income $\leq 1000$ ETB were more likely to experience poor sleep quality than those with monthly income above 1000 ETB                                                                                                                                                                                         |
| Cha 2018     | Cross-sectional<br>70678 adults 35-60 y from the general population in Korea                                     | Education level (junior high, high school, 2-year college, 4-year university)<br>Income level (range 1-11)<br>Employment status (yes vs no)                                                                                                                                                                   | Self-reported sleep duration                                                                                              | The higher the education level, the shorter the sleep duration for both genders. For men, higher income level is associated with shorter sleep duration, while it is not demonstrated in women.                                                                                                                                      |
| Chang 2018   | Cross-sectional<br>12174 subjects 3-79y from the general population in Canada                                    | Highest level of education attained in the household for preschoolers, children and youth or by the respondent for adults and older adults (less than secondary school degree, secondary school degree, postsecondary school degree)<br>Household income adequacy (based on total annual household income and | Self- or parent-reported (for those aged less than 12y) sleep duration (recommended, short, long according to guidelines) | Among preschoolers, low household income was significantly associated with short sleep. Among older adults, less than secondary school education and full-time employment were significantly associated with short sleep. Among adults and older adults, less than secondary school education was significantly associated with long |



|                  |                                                                                                                                           |                                                                                                                                                                                                                                                                    |                                                                                                                                                                             |                                                                                                                                                                                                                                                     |                                                                                                                                                    |
|------------------|-------------------------------------------------------------------------------------------------------------------------------------------|--------------------------------------------------------------------------------------------------------------------------------------------------------------------------------------------------------------------------------------------------------------------|-----------------------------------------------------------------------------------------------------------------------------------------------------------------------------|-----------------------------------------------------------------------------------------------------------------------------------------------------------------------------------------------------------------------------------------------------|----------------------------------------------------------------------------------------------------------------------------------------------------|
|                  |                                                                                                                                           | number of people living in the household and categorized as low, middle, or high)<br>Employment status (full-time, part-time, unemployed) for adults and older adults                                                                                              |                                                                                                                                                                             | sleep. Unemployed older adults were more likely to sleep longer.                                                                                                                                                                                    |                                                                                                                                                    |
| Counts 2018      | Cross-sectional<br>391 college students at a state university in Montana                                                                  | Subjective childhood SES (MacArthur scale)                                                                                                                                                                                                                         | Sleep quality (PSQI global score)                                                                                                                                           | Lower subjective childhood SES was associated with poorer sleep quality                                                                                                                                                                             | The association was moderated by risky family environment. In less risky family environments, childhood SES was not associated with sleep quality. |
| de Jonge 2018    | Cohort<br>230 employees 23-63y in 3 hospitals in Netherlands followed for 2y                                                              | Education<br>Occupation level                                                                                                                                                                                                                                      | Insomnia symptoms (three items derived from the Maastricht Questionnaire; no, sometimes, yes)                                                                               | Education and occupation level were not associated with insomnia over time                                                                                                                                                                          |                                                                                                                                                    |
| de Lima 2018     | Cross-sectional<br>1110 adolescents 14-19y from high schools in São José, Brazil                                                          | Maternal education (<8 vs ≥8 years)<br>Family income (up to two minimum wages; two to ten times the minimum wage; more than ten times the minimum wage)                                                                                                            | Sleep quality (single question, almost never/seldom/sometimes vs with relative frequency/almost always)                                                                     | Students whose mothers had high level of education were more likely to have low quality of sleep                                                                                                                                                    |                                                                                                                                                    |
| Dong 2018        | Cross-sectional<br>1584 adults ≥45y from the general population of a rural community in Deqing, China                                     | Educational level (<9 years vs ≥9 years)<br>Monthly individual income (<77 US\$, 77–330 US\$, >330 US\$)                                                                                                                                                           | Sleep quality (PSQI global score >5)                                                                                                                                        | Subjects with lower income were more likely to have poor sleep quality                                                                                                                                                                              |                                                                                                                                                    |
| Gómez-Olivé 2018 | Cross-sectional<br>5059 adults ≥40y members of a general population cohort in the Agincourt district of Mpumalanga Province, South Africa | Education (no formal education, 1–7y, 8–11y, 12 or more years)<br>Employment status (not working, employed, homemaker)<br>Household wealth index score (modern assets, power supply, water and sanitation, quality of housing, and livestock assets, in quintiles) | Sleep duration (in quartiles)<br>Insufficient sleep (sometimes/rarely/never sufficient vs often/very often sufficient)<br>Restless sleep (yes vs no)<br>Snoring (yes vs no) | Subjects with higher education were less likely to report insufficient and restless sleep. Unemployed were more likely to have longer sleep duration and restless sleep. Those in the lowest wealth quintile were more likely to have longer sleep. |                                                                                                                                                    |
| Goyal 2018       | Cross-sectional<br>1346 children 5-10y from 3 schools in Bhopal, India                                                                    | Maternal education (illiterate vs literate)<br>Maternal employment status (yes vs no)                                                                                                                                                                              | OSA risk (score >0.33 in the Sleep-Related Breathing Disorder scale of the Pediatric Sleep Questionnaire)                                                                   | Maternal employment was associated with OSA risk                                                                                                                                                                                                    |                                                                                                                                                    |

|                |                                                                                                                                                            |                                                                                                                                                                                             |                                                                                      |                                                                                                                                                                                                |                                                                                                                   |
|----------------|------------------------------------------------------------------------------------------------------------------------------------------------------------|---------------------------------------------------------------------------------------------------------------------------------------------------------------------------------------------|--------------------------------------------------------------------------------------|------------------------------------------------------------------------------------------------------------------------------------------------------------------------------------------------|-------------------------------------------------------------------------------------------------------------------|
| Jaisoorya 2018 | Cross-sectional<br>7017 adults 18-60y<br>attending 71 primary<br>health centers in the State<br>of Kerala, India                                           | Education ( $\leq 10$ y vs $> 10$ y)<br>Income (below vs above poverty line)<br>Employment status (unemployed vs<br>employed)                                                               | Insomnia (ISI score 0, $< 15$ ,<br>$\geq 15$ )                                       | Lower education was associated with<br>both subclinical and clinical<br>insomnia. Unemployment was<br>associated only with subclinical<br>insomnia.                                            |                                                                                                                   |
| Khan 2018      | Cross-sectional<br>1700 adults $\geq 20$ y from the<br>general population of<br>Dehradun district, India                                                   | Education (none, high school,<br>intermediate, graduate and above)<br>Employment (not working, service,<br>agriculture, self employed)<br>Socio-economic class (upper, middle,<br>lower)    | Insomnia (ISI score $> 7$ )                                                          | Higher education and unemployment<br>increased the odds for having clinical<br>insomnia                                                                                                        |                                                                                                                   |
| Lima 2018      | Cross-sectional<br>1969 adults $\geq 20$ y from the<br>general population of<br>Campinas, Brazil                                                           | Work status (yes vs no)<br>Income ( $< 1$ ; 1-2; 3 or more minimum<br>wages)<br>Schooling (0-4; 5-8; 9-11; 12 or more<br>years of schooling)                                                | Sleep duration (6h or less,<br>7-8h, 9h or more)                                     | Those with higher schooling were<br>more likely to have short sleep. The<br>chance of long sleep was lower in<br>those who have more years of<br>schooling, have higher income, and<br>worked. | Adjusting for chronic<br>diseases and health<br>problems attenuated the<br>effects of education on short<br>sleep |
| Lin 2018       | Cohort<br>1747 7 <sup>th</sup> grade adolescents,<br>members of a primary<br>school cohort in Taipei<br>City and Hsinchu County,<br>Taiwan followed for 6y | Paternal and maternal years of education                                                                                                                                                    | Self-reported time in bed                                                            | Lower paternal education was<br>associated with longer weekday<br>TIB over time                                                                                                                |                                                                                                                   |
| Ma J 2018      | Cross-sectional<br>1125 adults 18-65y from<br>the general population in<br>26 communities of<br>Beijing, China                                             | Monthly income (5 levels)<br>Education (primary, secondary, tertiary)<br>Housing tenure (owner vs renters)<br>Employment status (employed vs<br>unemployed)                                 | Sleep disturbance frequency<br>(single question, never vs<br>rarely/sometimes/often) | Higher income and owing a house<br>were associated with sleep<br>disturbances                                                                                                                  |                                                                                                                   |
| Ma Y 2018      | Cross-sectional<br>3045 adults $> 60$ y from<br>the general population in<br>Anhui Province, China                                                         | Education (illiterate, elementary school,<br>junior school or above)<br>Income status (fixed vs no fixed income)                                                                            | Athens Insomnia Scale<br>score (0-3, 4-6, $> 6$ )                                    | Having no fixed income was<br>significantly associated with higher<br>likelihood of suffering from severe<br>insomnia                                                                          |                                                                                                                   |
| Manyanga 2018  | Cross-sectional<br>6040 children 9-11 y<br>recruited from schools in<br>12 countries                                                                       | Annual household income (4 levels)<br>Highest level of parental education (did<br>not complete high school, completed high<br>school or some college, bachelor's or<br>postgraduate degree) | 1-week actigraphy (sleep<br>duration, sleep efficiency)                              | There were no significant linear<br>trends for sleep duration and sleep<br>efficiency based on income and<br>education levels.                                                                 |                                                                                                                   |
| Matthews 2018  | Cross-sectional                                                                                                                                            | Family Hollingshead score (measured<br>through age 7 to 16)                                                                                                                                 | 1-week actigraphy (sleep<br>duration, WASO)                                          | Greater WASO was associated with<br>lower baseline childhood SES,                                                                                                                              | Shorter sleep duration was<br>associated with increasing                                                          |

|                   |                                                                                                                                                 |                                                                                                                                                                                                                               |                                                                                                |                                                                                                                                                             |                                                                                                                  |
|-------------------|-------------------------------------------------------------------------------------------------------------------------------------------------|-------------------------------------------------------------------------------------------------------------------------------------------------------------------------------------------------------------------------------|------------------------------------------------------------------------------------------------|-------------------------------------------------------------------------------------------------------------------------------------------------------------|------------------------------------------------------------------------------------------------------------------|
|                   | 244 men 30-34 y from an established school cohort in Pittsburgh                                                                                 | Adult Hollingshead score                                                                                                                                                                                                      | Perceived sleep quality (5-point scale averaged over a week)                                   | decreasing childhood SES and lower adult SES                                                                                                                | childhood SES only in Whites                                                                                     |
| Meneton 2018      | Cohort<br>20625 adults 35-50y working at the French National Gas and Electricity Company and followed for 25y                                   | Social status (composite score of educational attainment, wealth, income, and occupation; high, middle, low)                                                                                                                  | Sleep complaints (single question, yes vs no)                                                  | Lower social status at baseline predicts the incidence of sleep complaints                                                                                  | Work environment has a significant mediating effect in the association between social class and sleep complaints |
| Miner 2018        | Cross-sectional<br>379 adults $\geq$ 78y, members of a cohort recruited from a large health plan in New Haven, Connecticut                      | Education (< vs $\geq$ high school)                                                                                                                                                                                           | Insomnia (ISI score >7)                                                                        | Education was not associated with insomnia                                                                                                                  |                                                                                                                  |
| Olorunmoteni 2018 | Cross-sectional<br>346 adolescents 10-19y from secondary schools in Ile-Ife, Nigeria                                                            | Social class (composite score of parental educational level and occupational status, in 5 levels)                                                                                                                             | Self-reported sleep duration (Adolescent Sleep Habit Survey Questionnaire, <8½h vs $\geq$ 8½h) | The odds of having sufficient sleep on the weekdays increased almost 3-fold among the lower social class compared to those of the higher social class       |                                                                                                                  |
| Park 2018         | Cross-sectional<br>709 subjects from the general population in Yangcheon-gu, Seoul, South Korea                                                 | Education (high school or less vs college or more)                                                                                                                                                                            | Insomnia (ISI score $\geq$ 10)                                                                 | Education was not associated with insomnia                                                                                                                  |                                                                                                                  |
| Peltzer 2018      | Cross-sectional<br>4725 adults $\geq$ 40y members of a general population cohort in the Agincourt district of Mpumalanga Province, South Africa | Formal education (none, grade 1–7, grade 8–11, grade 12 or more)<br>Household wealth index score (ownership of household items, livestock, and vehicles; in quintiles)                                                        | Sleep duration (<7h, 7-8h, >8h)                                                                | Greater wealth status was associated with short sleep duration. Having higher education and greater wealth status decreased the odds of long sleep duration |                                                                                                                  |
| Pepin 2018        | Cross-sectional<br>23088 mothers 18-54y with children <13y from the general US population                                                       | Education (less than a high school diploma/GED; high school diploma/GED; some college education or associate's degree; bachelor's degree or more)<br>Employment status (employed full-time, employed part-time, non-employed) | Sleep duration                                                                                 | Higher education and full-time employment were associated with shorter sleep duration                                                                       |                                                                                                                  |
| Perlus 2018       | Cohort<br>1615 12 <sup>th</sup> grade adolescents, members of a                                                                                 | Family affluence (owning computers, vehicles, and taking vacations; low, moderate, high)                                                                                                                                      | Short sleep duration (<7h)                                                                     | Students whose parents had completed some college education compared to those with high school or                                                           |                                                                                                                  |

|                   |                                                                                                                         |                                                                                                                                                                                                                       |                                                                                                                                                                                                                                         |                                                                                                                                                                       |                                                                                                                                                    |
|-------------------|-------------------------------------------------------------------------------------------------------------------------|-----------------------------------------------------------------------------------------------------------------------------------------------------------------------------------------------------------------------|-----------------------------------------------------------------------------------------------------------------------------------------------------------------------------------------------------------------------------------------|-----------------------------------------------------------------------------------------------------------------------------------------------------------------------|----------------------------------------------------------------------------------------------------------------------------------------------------|
|                   | US high school cohort followed for 1y                                                                                   | Highest level of parental education (high school or less, some college, bachelor degree or greater)                                                                                                                   |                                                                                                                                                                                                                                         | less reported greater weekday sleep insufficiency                                                                                                                     |                                                                                                                                                    |
| Plancoulaine 2018 | Cohort<br>1205 children recruited at birth in the Poitiers and Nancy university hospitals, France and followed for 5-6y | Monthly household income (<€1500, €1500-3000, >€3000)<br>Highest parental educational level (below high-school diploma, high-school diploma, above)<br>Maternal employment status (no, part-time, full-time)          | Patterns of parent-reported sleep duration from the age 2 to 5-6 years by group-based trajectory modelling method (5-group model: short-sleep, medium-low-sleep, medium-high-sleep, long-sleep, and changing-sleep duration trajectory) | Belonging to the short-sleep and medium-low-sleep trajectory was more likely for children with full-time working mothers compared to the medium-high-sleep trajectory |                                                                                                                                                    |
| Schlieber 2018    | Cross-sectional<br>2868 children 2-3y enrolled in Head Start across USA                                                 | Ratio of income to poverty<br>Maternal educational level<br>Maternal employment                                                                                                                                       | Parent-reported sleep duration                                                                                                                                                                                                          | Children whose mothers worked were more likely to have a lower amount of sleep at night                                                                               |                                                                                                                                                    |
| Thichumpa 2018    | Cross-sectional<br>266 adults ≥60y from the general population of a sub-district in rural Chiang Rai Province, Thailand | Education (no school, primary school, >primary school)                                                                                                                                                                | Sleep quality (PSQI global score >5)                                                                                                                                                                                                    | Higher educational level was associated with poor sleep quality                                                                                                       |                                                                                                                                                    |
| Vermeiren 2018    | Cross-sectional<br>1403 children 4-12 y from 9 primary schools in Parkstad region, Netherlands                          | Maternal education (primary/vocational/lower secondary, higher secondary/lower professional, higher professional/academic)<br>Parental material deprivation (4-item weighted variable divided into tertiles)          | Parent-reported sleep duration                                                                                                                                                                                                          | Average sleep duration was significantly higher for pupils with high SES by material deprivation                                                                      | The high SES group by maternal education showed a less steep decline in average sleeping hours with increasing age compared with the low SES group |
| Wu 2018           | Cross-sectional<br>6905 adults participating in a poverty alleviation program in rural areas of Ezhou City, China       | Education (illiterate, elementary school, junior middle school, senior middle school or higher)<br>Average annual income per person of a household (RMB ≤1000 vs >1000)<br>Employment status (employed vs unemployed) | Sleep quality (PSQI global score >5)                                                                                                                                                                                                    | Lower education, lower income, and unemployment were associated with increased risk of poor sleep quality                                                             | In males, education was not associated with sleep quality                                                                                          |
| Yang 2018         | Cross-sectional<br>11954 students of 50 universities in China                                                           | Maternal occupation (operations and commercial work; staff and administration; teachers, scientific and technical work)                                                                                               | Short sleep duration (2 cut-offs; <6h, <7h)                                                                                                                                                                                             | Students whose mothers had higher occupational status had higher odds of short sleep                                                                                  |                                                                                                                                                    |

|                |                                                                                                                             |                                                                                                                                                                                                                                                                                                                        |                                                                   |                                                                                                                                                                                                                                             |                                                                                                                                                                                                                                                                                                                                                                                                                                                                                                                                                        |
|----------------|-----------------------------------------------------------------------------------------------------------------------------|------------------------------------------------------------------------------------------------------------------------------------------------------------------------------------------------------------------------------------------------------------------------------------------------------------------------|-------------------------------------------------------------------|---------------------------------------------------------------------------------------------------------------------------------------------------------------------------------------------------------------------------------------------|--------------------------------------------------------------------------------------------------------------------------------------------------------------------------------------------------------------------------------------------------------------------------------------------------------------------------------------------------------------------------------------------------------------------------------------------------------------------------------------------------------------------------------------------------------|
| Zheng 2018a    | Cross-sectional<br>4399 adults attending medical outpatient clinics of 4 general hospitals in Guangzhou, China              | Education (in years)<br>Personal monthly income (<6000 vs ≥6000 yuan)<br>Employment status (employed, unemployed, retired)<br>Health insurance (yes vs no)                                                                                                                                                             | Insomnia symptoms in the past month (no/sometimes vs often)       | Lower education was associated with all three types of insomnia symptoms. Lacking health insurance increased the odds of difficulty initiating sleep. Unemployed or retired subjects were less likely to have difficulty maintaining sleep. |                                                                                                                                                                                                                                                                                                                                                                                                                                                                                                                                                        |
| Zheng 2018b    | Cross-sectional<br>4399 adults attending medical outpatient clinics of 4 general hospitals in Guangzhou, China              | Education (in years)<br>Personal monthly income (<6000 vs ≥6000 yuan)<br>Employment status (employed, unemployed, retired)<br>Health insurance (yes vs no)                                                                                                                                                             | Sleep duration (<7, 7-8, >8h)                                     | Lower education was associated with both short and long sleep. Unemployment increased the odds of long sleep.                                                                                                                               |                                                                                                                                                                                                                                                                                                                                                                                                                                                                                                                                                        |
| Akay 2019      | Cross-sectional<br>76,046 individual-year observations 20-65y from a general population cohort in Germany from 2008 to 2013 | Education (in years)<br>Employment status (employed vs not employed)<br>Absolute per capita household income<br>Relative income (average equalized household income of all people who live in the same region, who are in the same age group, who are similarly educated, and who are of the same gender in each year) | Sleep duration<br>Sleep quality (single question, 11-point scale) | There was a substantial negative association between relative income and sleep duration and quality. More years of education were positively and significantly related to both amount of sleep and sleep quality.                           | The estimates of relative income on quantity of sleep are larger among younger people, and the effect of relative income on sleep quality is larger among older people. The parameter estimates of absolute and relative income are larger among males and married individuals for both quantity and quality of sleep. The effect of relative income on sleep duration and quality is larger in people with relatively fewer working hours, a higher demand for household production and leisure activities, and lower physical health and well-being. |
| Åkerstedt 2019 | Cohort<br>5377 workers 18-68y from the general working                                                                      | Occupational category (blue-collar workers, low white-collar workers, high white-collar workers)                                                                                                                                                                                                                       | Insomnia symptom trajectories (4 items from Karolinska Sleep      | There was no significant difference in insomnia symptom trajectories between occupational groups                                                                                                                                            |                                                                                                                                                                                                                                                                                                                                                                                                                                                                                                                                                        |

|                |                                                                                                                          |                                                                                                                                                                        |                                                                                              |                                                                                                                                                       |                                                                                                                                                          |
|----------------|--------------------------------------------------------------------------------------------------------------------------|------------------------------------------------------------------------------------------------------------------------------------------------------------------------|----------------------------------------------------------------------------------------------|-------------------------------------------------------------------------------------------------------------------------------------------------------|----------------------------------------------------------------------------------------------------------------------------------------------------------|
|                | population in Sweden followed for 8y                                                                                     |                                                                                                                                                                        | Questionnaire, 6-point scale)                                                                |                                                                                                                                                       |                                                                                                                                                          |
| Al-Hazzaa 2019 | Cross-sectional<br>1051 children 6-13y from elementary schools in Riyadh, Saudi Arabia                                   | Parental education (<high school, high school, university degree, post-graduate degree)<br>Family income (<10,000SR, 10,000-20,000SR, >20,000SR)                       | Parent-reported sleep duration (<9h vs ≥9h)                                                  | Higher parental education was associated with lower odds of short sleep duration                                                                      |                                                                                                                                                          |
| Althakafi 2019 | Cross-sectional<br>805 adults 15-60y responding in an online survey in Saudi Arabia                                      | Educational level (primary, intermediate, secondary, university/more)                                                                                                  | Self-reported sleep duration (<7h vs ≥7h)                                                    | Educational level was not associated with short sleep duration                                                                                        |                                                                                                                                                          |
| Barros 2019    | Cross-sectional<br>1998 adults ≥20y from the general population in Campinas, Brazil                                      | Education (0-3y, 4-8y, 9-11y, ≥12y)<br>Per capita family income (3 categories)<br>Employment (working vs not working)                                                  | Sleep quality (single question; excellent/very good/good vs regular/poor/very poor)          | Unemployment was associated with higher prevalence of poor sleep quality                                                                              | Adjusting for amount of health problems, self-rated health, common mental disorders, and life satisfaction attenuated the effect                         |
| Bazargan 2019  | Cross-sectional<br>398 African-American adults ≥65y from an urban region in Los Angeles, USA                             | Educational attainment (in years)<br>Financial difficulty (score derived from 3 measures: lack of cash to afford clothing, food, and difficulty with paying bills)     | Insomnia symptoms (ISI score)                                                                | Higher financial difficulty was associated with a higher frequency of insomnia symptoms                                                               |                                                                                                                                                          |
| Carneiro 2019  | Cross-sectional<br>651 children 2-15y recruited from a public hospital and a private school in Cape Verde and Mozambique | Parental education (in years; dichotomized)                                                                                                                            | Parent-reported sleep problems (Children's Sleep Habits Questionnaire total score)           | Higher parental education was associated with less sleep problems                                                                                     |                                                                                                                                                          |
| Chami 2019     | Cross-sectional<br>501 adults from the general population of Beirut, Lebanon                                             | Education level (below high school/high school/university)<br>Monthly income (<\$1,000/≥\$1,000)<br>Employment status (employed/unemployed)                            | Insomnia (DSM-5 and ICSD-3 criteria)<br>Sleep apnea risk (Berlin Questionnaire)              | Education level below high school was a significant predictor of insomnia. Unemployment was significantly associated with increased sleep apnea risk. |                                                                                                                                                          |
| Chen 2019      | Cross-sectional<br>1693 adults ≥60y from the general US population                                                       | Present poverty (below 133% of the federal poverty line)<br>Exposure to poverty across previous 45y (no exposure, 1-y exposure, 2-4y of exposure, and ≥5y of exposure) | Self-reported sleep duration (<6h, 6-10h, >10h)<br>Self-reported sleep latency (≤ vs >30min) | Present poverty and exposure to over 2y of poverty was associated with long sleep duration and latency                                                | Adjusting for marital status, years of education, employment status, hours of work, home ownership, self-rated health, residential location and state of |

|                |                                                                                                                                |                                                                                                                                                                                                                                                                                                    |                                                                                                                                                                      |                                                                                                                                                                 |                                                                                                                                         |
|----------------|--------------------------------------------------------------------------------------------------------------------------------|----------------------------------------------------------------------------------------------------------------------------------------------------------------------------------------------------------------------------------------------------------------------------------------------------|----------------------------------------------------------------------------------------------------------------------------------------------------------------------|-----------------------------------------------------------------------------------------------------------------------------------------------------------------|-----------------------------------------------------------------------------------------------------------------------------------------|
|                |                                                                                                                                |                                                                                                                                                                                                                                                                                                    |                                                                                                                                                                      |                                                                                                                                                                 | residence, family-level characteristics, functional limitation, and psychological distress attenuated the effect on long sleep duration |
| Doane 2019     | Cross-sectional<br>381 twin children 7-8y from a general population twin birth cohort of Arizona, USA                          | Composite SES (12 months): income-to-needs ratio (annual income divided by the federal poverty threshold for that household size) and parental education (less than high school, high school, some college, college degree, two or more years of graduate school, graduate or professional degree) | 1-week actigraphy (sleep duration, sleep efficiency, sleep onset latency, midpoint variability)<br>Parent-reported sleep problems (Child Sleep Habits Questionnaire) | Higher early SES was associated with longer sleep duration, shorter sleep latency and lower midpoint variability                                                | Quality of the home environment mediated the effects of early SES on sleep duration and variability                                     |
| Gordon 2019    | Cross-sectional<br>2211 adults from the general population in Australia                                                        | Education (primary/secondary school, TAFE/technical college, university)<br>Occupation (manager/professional, white collar, blue collar, retired/pension, unemployed/student)                                                                                                                      | Perceived sleep insufficiency frequency in past month (0-13 vs 14-30 days)                                                                                           | There were no statistically significant associations between frequent perceived insufficient sleep and education or occupation                                  |                                                                                                                                         |
| Hartescu 2019  | Cross-sectional<br>9238 adults recruited from social media and websites in South Africa, Australia, China, South Korea, and UK | Education (less than primary/primary/lower secondary; upper secondary/post-secondary nontertiary; tertiary)<br>Employment status (yes vs no)                                                                                                                                                       | Insomnia (DSM-5 criteria)                                                                                                                                            | Lower education and unemployment were associated with insomnia diagnosis                                                                                        |                                                                                                                                         |
| Kobel 2019     | Cross-sectional<br>308 first and second grade children in Baden-Württemberg state, Germany                                     | Highest parental education (high school degree or not)                                                                                                                                                                                                                                             | Sleep duration (6-day accelerometry; averaged in h and dichotomized < vs ≥10:08h)                                                                                    | Parental education was not linearly associated with sleep duration. Lower parental education was a significant predictor of short sleep compared to long sleep. | The effect of parental education on sleep duration was significant in boys but not in girls                                             |
| Laganière 2019 | Cohort<br>529 children recruited at birth in obstetric clinics of Montreal and Hamilton, Canada and followed until 48 months   | High SES (high maternal education level and high income) vs middle/low SES (low on at least one of the variables)                                                                                                                                                                                  | Sleep rhythmic movements (single question, Children's Sleep Habits Questionnaire)                                                                                    | Lower SES predicted sleep rhythmic movements in children                                                                                                        |                                                                                                                                         |
| Lee ES 2019    | Cross-sectional<br>1228 adults 23-37y from the general economically                                                            | Employment status (categorised as permanent employment; precarious employment; unemployment) trajectories                                                                                                                                                                                          | Self-reported sleep duration (<7h vs ≥7h)                                                                                                                            | Compared to stability sustained group, gradually deteriorated, gradually alleviated, and instability                                                            |                                                                                                                                         |

|                |                                                                                                                    |                                                                                                                                                                                                               |                                                                     |                                                                                                                                      |                                                                                                                                                                           |
|----------------|--------------------------------------------------------------------------------------------------------------------|---------------------------------------------------------------------------------------------------------------------------------------------------------------------------------------------------------------|---------------------------------------------------------------------|--------------------------------------------------------------------------------------------------------------------------------------|---------------------------------------------------------------------------------------------------------------------------------------------------------------------------|
|                | active population in South Korea                                                                                   | by latent class growth analysis for the previous 6y (stability sustained, gradually deteriorated, swiftly alleviated, gradually alleviated, instability sustained)                                            |                                                                     | sustained groups had greater odds of reporting less hours of daily sleep                                                             |                                                                                                                                                                           |
| Lee EY 2019    | Cross-sectional<br>10708 subjects $\geq 12$ y from the general population in South Korea                           | Education level (for adults; less than post-secondary graduate vs post-secondary graduate or more)<br>Household income (ratio of total monthly household income to number of household members; in quartiles) | Self-reported sleep duration                                        | Higher income was associated with longer sleep duration only in adolescents. Education was not associated with sleep duration.       |                                                                                                                                                                           |
| Lei 2019       | Cross-sectional<br>2674 adults recruited during health examinations in 2 hospitals in Taiwan                       | Education (<10, 10-12, $\geq 12$ years)                                                                                                                                                                       | Sleep quality (PSQI global score >5)                                | Lower education level was associated with poor sleep quality                                                                         |                                                                                                                                                                           |
| Maeda 2019     | Cross-sectional<br>43865 adults 20-59y from the general population in Japan                                        | Employment status (regularly employed, non-regularly employed, self-employed, others, unemployed, not in the labor force)                                                                                     | Sleep difficulty (single question, yes vs no)                       | Compared to regularly employed, unemployed men and women and men not in the labor force had higher odds of sleep problems            | Adjusting for marital status, education level, mental illness, smoking status, parental status, household expenditure, and chronic diseases attenuated the effects in men |
| Manyanga 2019  | Cross-sectional<br>683 children 9-11y recruited from primary schools in Maputo city and Macia district, Mozambique | Parental education (bachelor's/graduate degree vs lower)                                                                                                                                                      | Sleep duration (7-day accelerometry; <9 h/night vs 9 to 11 h/night) | Parental education was not associated with short sleep duration                                                                      |                                                                                                                                                                           |
| Matenchuk 2019 | Cross-sectional<br>619 infants at 3 months of age, members of a population-based birth cohort in Edmonton, Canada  | Maternal education (university degree vs lower)                                                                                                                                                               | Parent-reported sleep duration                                      | Infants of mothers without a university degree had significantly reduced sleep duration compared to mothers with a university degree | The effect of lower maternal education on infant total sleep duration was mediated through prenatal depression and birth mode                                             |
| Miner 2019     | Cross-sectional<br>357 adults 78-102y from a health plan cohort in New Haven, USA                                  | Education (did not complete high school vs higher)                                                                                                                                                            | Hypersomnia (ESS score)                                             | Education was not associated with hypersomnia                                                                                        |                                                                                                                                                                           |



|                        |                                                                                                                |                                                                                                                                                                     |                                                                                                        |                                                                                                                                                                                                                                  |                                            |
|------------------------|----------------------------------------------------------------------------------------------------------------|---------------------------------------------------------------------------------------------------------------------------------------------------------------------|--------------------------------------------------------------------------------------------------------|----------------------------------------------------------------------------------------------------------------------------------------------------------------------------------------------------------------------------------|--------------------------------------------|
| Muller 2019            | Cross-sectional<br>910 preschoolers 3-4y<br>from a birth cohort in New<br>Zealand                              | Maternal socioeconomic deprivation<br>(composite score from yes/no responses<br>to various deprivation characteristics)                                             | Mother-reported sleep<br>duration (<10h vs 10-13h)                                                     | Preschoolers whose mothers<br>experienced high individual<br>deprivation were twice as likely as<br>children of mothers reporting no<br>deprivation characteristics to have<br>short sleep on the weekend but not on<br>weekdays |                                            |
| Nagata 2019            | Cross-sectional<br>14786 adults 24-32y from<br>a general population<br>cohort of adolescents in<br>USA         | Subjective food insecurity (single<br>question; yes vs no)                                                                                                          | Insomnia symptoms (2<br>questions; two times or less<br>vs three times or more per<br>week)            | Food insecurity was associated with<br>more frequent insomnia symptoms                                                                                                                                                           |                                            |
| Nasim 2019             | Cross-sectional<br>12121 adolescents 10-19y<br>from intermediate and<br>secondary schools in Saudi<br>Arabia   | Self-reported SES (better than others,<br>similar to others, poorer than others)                                                                                    | Self-reported sleep duration<br>(<7h vs ≥7h)                                                           | Adolescents who considered<br>themselves to be “poorer than others”<br>in socioeconomic status were more<br>likely to report sleep deprivation                                                                                   |                                            |
| Peltzer 2019           | Cross-sectional<br>31432 adults ≥15y from<br>the general population of<br>Indonesia                            | Education (none or elementary vs high<br>school or higher)<br>Subjective economic status (6-step<br>ladder; classified as poor, medium, rich)                       | Insomnia (10 items from the<br>PROMIS sleep disturbance<br>and impairment<br>questionnaire; score >20) | Lower education and lower economic<br>status increased the odds of having<br>insomnia                                                                                                                                            |                                            |
| Petrovic 2019          | Cross-sectional<br>2162 adults 40-81y<br>members of a general<br>population cohort in<br>Lausanne, Switzerland | Occupation (managers, lower level<br>executives, low qualified non-manuals<br>and manuals)<br>Education (university, higher secondary,<br>lower secondary or lower) | Home PSG (apnea-<br>hypopnea index and ≥3%<br>oxygen desaturation index)                               | Lower occupational position was<br>associated with an increased risk of<br>AHI ≥30 and ODI ≥30. Lower<br>education was associated with an<br>increased risk of ODI ≥15.                                                          | These associations were<br>mediated by BMI |
| Pontes 2019            | Cross-sectional<br>1280 adults ≥18y from the<br>general population in Rio<br>Grande, Brazil                    | Education (0 to 11 years vs 12 years or<br>more)                                                                                                                    | Sleep bruxism (ICSD<br>criteria)                                                                       | Higher education was associated with<br>higher prevalence of sleep bruxism                                                                                                                                                       |                                            |
| Poulain 2019           | Cross-sectional<br>493 children 3-10y from a<br>population-based cohort in<br>Leipzig, Germany                 | Maternal education (7 categories)<br>Maternal occupation (7 categories)<br>Household income (7 categories)<br>Composite score (Winkler index)                       | Parent-reported sleep<br>problems (Children’s Sleep<br>Habits Questionnaire score)                     | There were no significant associations<br>between SES indicators and child<br>sleep problems                                                                                                                                     |                                            |
| Redondo-<br>Bravo 2019 | Cross-sectional<br>4025 bank employees 40-<br>54y in Madrid, Spain                                             | Education (no university versus<br>university studies)                                                                                                              | Sleep duration (7-day<br>accelerometry)                                                                | Having university studies was<br>associated with longer sleep duration                                                                                                                                                           |                                            |

|                |                                                                                                                                       |                                                                                                                                                                                                                                                 |                                                                                           |                                                                                                                                                                                                                                                                                   |
|----------------|---------------------------------------------------------------------------------------------------------------------------------------|-------------------------------------------------------------------------------------------------------------------------------------------------------------------------------------------------------------------------------------------------|-------------------------------------------------------------------------------------------|-----------------------------------------------------------------------------------------------------------------------------------------------------------------------------------------------------------------------------------------------------------------------------------|
| Ren 2019       | Cross-sectional<br>21435 adults 18-79y from the general population in Jilin Province, China                                           | Educational level (primary school or below, junior middle school, senior middle school, undergraduate or above)<br>Average monthly income (¥ <500, 500-3000, >3000)<br>Occupation (manual worker, mental worker, other)                         | Self-reported sleep duration (<7h, 7-9h, >9h)                                             | Higher educational level was associated with lower odds of short and long sleep. Higher monthly income was associated with lower odds of long sleep.                                                                                                                              |
| Sheehan 2019   | Cross-sectional<br>398382 adults 18-84y from the general US population                                                                | Educational attainment (less than high school, high school degree, some college, college or more)<br>Annual household income (US\$0-34999, US\$35000-74999, ≥US\$75000)<br>Employment status (0h worked, 0-39h worked, 40h worked, >40h worked) | Self-reported sleep duration (≤6h, 7-8h, ≥9h)                                             | Lower educational attainment was associated with increased odds of short and long sleep duration. Lower household income was associated with increased odds of short sleep. Unemployment was associated with increased odds of long sleep and lower odds of short sleep duration. |
| Singh 2019     | Cross-sectional<br>73 female adolescents 11-18y recruited from advertisements in urban and rural communities from 3 regions in Guyana | Household deprivation (Multidimensional Poverty Index; education, health, and living-standard dimensions)                                                                                                                                       | Self-reported sleep duration<br>7-day actigraphy (sleep duration, sleep efficiency, WASO) | Increasing household poverty scores were associated with longer self-reported sleep duration. Household poverty score did not significantly predict any of the actigraphic parameters.                                                                                            |
| Sun 2019       | Cross-sectional<br>5497 medical students 16-27y from a university in Shenyang, China                                                  | Parental education (primary, secondary, university)                                                                                                                                                                                             | Sleep quality (PSQI global score >5)                                                      | Parental education was not associated with sleep quality                                                                                                                                                                                                                          |
| Talvitie 2019  | Cross-sectional<br>1038 adults 30-45y members of a general population cohort in Finland                                               | Childhood SES (parental composite score; employment status, occupation, education, family income, household overcrowding)                                                                                                                       | Self-reported sleep duration (≤6h, 6.5-8.5h, ≥9h)<br>Insomnia symptoms (Jenkins's scale)  | Childhood SES was not associated with sleep duration or insomnia in adulthood                                                                                                                                                                                                     |
| Teo 2019       | Cross-sectional<br>482 adults 21-69y recruited from advertisements in Singapore                                                       | Education (university and above, others)<br>Income level<br>Occupation (manual labor, service industry, office work/professionals, unemployed/retired)<br>Housing (public, private, others)                                                     | Sleep duration (5-day activity tracking and self-reported)                                | Higher occupational class and living in private house was associated with longer wearable-derived but not self-reported sleep duration                                                                                                                                            |
| Vézina-Im 2019 | Cross-sectional                                                                                                                       | Education (less than high school; high school diploma; some postsecondary                                                                                                                                                                       | Insufficient sleep duration (<7h)                                                         | Lower education was associated with more frequent insomnia symptoms<br>Adjusting for behavioral factors (fruit and vegetable                                                                                                                                                      |

|                 |                                                                                                                   |                                                                                                                                                                                                                     |                                                                                                                                                                                                                                                         |                                                                                                                |
|-----------------|-------------------------------------------------------------------------------------------------------------------|---------------------------------------------------------------------------------------------------------------------------------------------------------------------------------------------------------------------|---------------------------------------------------------------------------------------------------------------------------------------------------------------------------------------------------------------------------------------------------------|----------------------------------------------------------------------------------------------------------------|
|                 | 9749 women 18-44y from the general population in Canada                                                           | studies; postsecondary certificate/diploma or university degree)<br>Household income                                                                                                                                | Insomnia symptoms (none/little of the time vs some/most/all the time)                                                                                                                                                                                   | intake, physical activity, smoking, and alcohol status) partially attenuated the effect                        |
| Wang 2019       | Cross-sectional<br>27424 adults 18-79y from the general population of five rural regions in Henan Province, China | Education (elementary school or below, junior high school, high school or above)<br>Average monthly individual income (<500RMB, 500~RMB, 1000~RMB)                                                                  | Sleep quality (PSQI global score >5)                                                                                                                                                                                                                    | Subjects who had low education level or low average monthly individual income experienced poor sleep quality   |
| Wendt 2019      | Cross-sectional<br>60202 adults from the general population in Brazil                                             | Education (none, incomplete primary level, complete primary level, secondary level, higher education)<br>Wealth index (assets index score; in quintiles)                                                            | Sleep disturbance frequency in last two weeks (single question; none/up to seven days vs more than seven days/almost every day)                                                                                                                         | Highly-educated individuals had lower prevalence of sleep disturbance than those with no formal education      |
| Williamson 2019 | Cohort<br>4517 infants 0-1y from the general population in Australia followed for 10y                             | Socioeconomic risk index (average of financial hardship score and composite SES score [derived from income, education, and occupational prestige])                                                                  | Parent-reported sleep problems trajectories (single question; no sleep problems, mild sleep problems over time, increased middle childhood sleep problems, limited infant/preschool sleep problems, persistent sleep problems through middle childhood) | Higher socioeconomic risks increased the odds for all sleep problem trajectories compared to no sleep problems |
| Yao 2019        | Cross-sectional<br>19584 adults 45-85y from the general population in Canada                                      | Education (middle school and under, secondary school, bachelor degree and above)<br>Annual personal income (<\$20,000, \$20,000-\$49,000, \$50,000-\$99,000, ≥\$100,000)<br>Employment status (employed vs retired) | Possible REM sleep behavior disorder (single question, yes vs no)                                                                                                                                                                                       | Lower education level was a risk factor of possible RBD                                                        |
| Zhu 2019        | Cross-sectional<br>82995 adults 43-79y members of a UK population-based cohort                                    | Residence deprivation index (Townsend score in quintiles; home ownership, car ownership, employment status)                                                                                                         | Sleep duration (accelerometry; <5h, 5-6h, 6-7h, 7-8h, >8h)                                                                                                                                                                                              | Those sleeping <6h were more likely to live in the most deprived area compared with the 7-8h sleep group       |
| Chami 2020      | Cross-sectional                                                                                                   | Education level (below high school/high school/above high school)                                                                                                                                                   | Self-reported sleep duration (<6h, 6-8h, >8h)                                                                                                                                                                                                           | There was no association between sleep duration and education, employment status, or income                    |

|               |                                                                                                                                                      |                                                                                                                                                                                |                                                                                                                                                                   |                                                                                                                                                                                                |
|---------------|------------------------------------------------------------------------------------------------------------------------------------------------------|--------------------------------------------------------------------------------------------------------------------------------------------------------------------------------|-------------------------------------------------------------------------------------------------------------------------------------------------------------------|------------------------------------------------------------------------------------------------------------------------------------------------------------------------------------------------|
|               | 501 adults 18-70y from the general population in Beirut, Lebanon                                                                                     | Employment status (employed vs unemployed)<br>Monthly income (<1000\$ vs ≥1000\$)                                                                                              |                                                                                                                                                                   |                                                                                                                                                                                                |
| Harding 2020  | Cross-sectional<br>1205 children 6-10y whose parents completed an online survey in New Zealand                                                       | Parental education (secondary or below vs tertiary or above)                                                                                                                   | High risk for SDB (Sleep Related Breathing Disorder Scale of the Pediatric Sleep Questionnaire score ≥0.33)                                                       | Parental education was not associated with high risk for SDB                                                                                                                                   |
| Holstein 2020 | Cross-sectional<br>35320 5 <sup>th</sup> , 7 <sup>th</sup> , and 9 <sup>th</sup> grade children recruited from public and private schools in Denmark | Parental occupation (professionals and managerial positions/technical and administrative staff, skilled workers/unskilled workers, outside labour market)                      | Difficulty falling asleep (single question; about every day, more than once a week, about every week, about every month, rarely or never)                         | Lower parental occupational class was associated with higher odds of difficulty falling asleep                                                                                                 |
| Li 2020       | Cross-sectional<br>3274 adults ≥60y from the general population in Tianjin, China                                                                    | Educational attainment (illiterate, primary school, junior high school, senior high school and above)<br>Subjective family economic status (good, moderate, poor)              | Sleep quality (PSQI global score >7)                                                                                                                              | Low educational attainment and poor subjective family economic status were significantly associated with higher odds of poor sleep quality                                                     |
| Metse 2020    | Cross-sectional<br>1265 adults from the general population in Australia                                                                              | Education (up to secondary school vs technical/tertiary)<br>Employment status (employed vs unemployed)                                                                         | Self-reported sleep duration, sleep onset latency, number of awakenings, WASO, and sleep efficiency (suboptimal vs appropriate according to age-related cut-offs) | Lower education was associated with higher odds of suboptimal sleep duration and sleep onset latency. Unemployment was associated with an increased likelihood of suboptimal sleep efficiency. |
| Seaton 2020   | Cross-sectional<br>227 male employees 18-66y from six workplaces in northern British Columbia, Canada                                                | Education (some high school, completed high school, trades certification/college diploma, university degree)<br>Income (>Can\$100,000, Can\$50,000-Can\$100,000, <Can\$50,000) | Self-reported sleep duration                                                                                                                                      | Education and income were not significantly associated with sleep duration                                                                                                                     |
| Sundbom 2020  | Cross-sectional<br>23875 adults 18-45y from the general population in Sweden                                                                         | Education (9-year compulsory school, high school graduation, academic degree)                                                                                                  | Insomnia symptoms (at least four times a week vs less)                                                                                                            | Both lower and higher educational level than high school graduation was associated with increased frequency of insomnia symptoms                                                               |
| Tomaso 2020   | Cross-sectional<br>184 adolescents 11-14y members of a cohort recruited from                                                                         | Family income-to-needs ratio (dividing family income by year's federal poverty level for a specific family size)                                                               | Sleep wake problems (Sleep-Wake Problems Behavior Scale of the Sleep Habits Survey)                                                                               | Lower income-to-needs ratio was associated with greater sleep-wake problems and daytime sleepiness                                                                                             |

|                    |                                                                                                             |                                                                                                                                                                                                                                                             |                                                                                                             |                                                                                                                                                                                                            |                                                                                                      |
|--------------------|-------------------------------------------------------------------------------------------------------------|-------------------------------------------------------------------------------------------------------------------------------------------------------------------------------------------------------------------------------------------------------------|-------------------------------------------------------------------------------------------------------------|------------------------------------------------------------------------------------------------------------------------------------------------------------------------------------------------------------|------------------------------------------------------------------------------------------------------|
|                    | advertisements in a small city in the Midwest US                                                            |                                                                                                                                                                                                                                                             | Daytime sleepiness (Epworth Sleepiness Scale– Revised for Children)                                         |                                                                                                                                                                                                            |                                                                                                      |
| Troxel 2020        | Cross-sectional<br>828 adults from the general population of two neighborhoods in Pittsburgh, USA           | Education (less than high school, high school diploma, some college, college/bachelor’s degree)<br>Annual household income<br>Food insecurity (Adult Food Security Survey Module)                                                                           | Sleep duration, sleep efficiency, WASO (7-day actigraphy)<br>Sleep quality (single question; 5-point scale) | Higher income was associated with higher sleep efficiency and lower WASO. Higher food insecurity was associated with shorter sleep duration, poorer sleep efficiency, and poorer subjective sleep quality. | Psychological distress mediated the association between food insecurity and subjective sleep quality |
| van de Straat 2020 | Cohort<br>23766 adults 50-96y from the general population in 14 European countries followed for 12y         | Educational attainment (completed tertiary education vs less)<br>Main occupational position (high skill vs low skill, based on International Standard Classification of Occupations)<br>Income satisfaction (4 levels)<br>Employment status (retired vs no) | Sleeping problems (single question, yes vs no)                                                              | Income dissatisfaction was associated with sleeping problems                                                                                                                                               |                                                                                                      |
| Visvalingam 2020   | Cross-sectional<br>464 employees ≥21y from 4 companies in Singapore                                         | Education (primary, secondary and higher secondary, pre-college, college and above)<br>Monthly income (<S\$4000, ≥S\$4000)<br>Job category (managers and admin personnel, engineers, technicians and traffic controllers, customer service workers)         | Sleep quality (PSQI global score >5)<br>Sleep duration (PSQI component; <7h)                                | SES was not significantly associated with sleep quality and duration                                                                                                                                       |                                                                                                      |
| Wendt 2020         | Cross-sectional<br>2462 22-year-old adults from a population-based birth cohort in Pelotas, Brazil          | Wealth index (asset index in quintiles)                                                                                                                                                                                                                     | Sleep duration and efficiency (7-day accelerometry)                                                         | Women in the poorest quintile of wealth index presented with lower sleep efficiency                                                                                                                        |                                                                                                      |
| Wu 2020            | Cross-sectional<br>36586 adults 20-74y from the general population of Songjiang district in Shanghai, China | Education (junior middle school or lower, senior middle school, college degree or above)<br>Occupation (officer, businessman/serviceman, manual worker, others)                                                                                             | Sleep quality (PSQI global score >7)                                                                        | Education level was unrelated with sleep quality. Higher occupation level was associated with better sleep quality in females.                                                                             |                                                                                                      |
| Sarveswaran 2021   | Cross-sectional<br>789 adolescents 10-19y from the general                                                  | Income (Modified BG Prasad’s scale; lower and lower middle, middle, upper and upper middle)                                                                                                                                                                 | Sleep quality (PSQI global score ≥5)                                                                        | Higher income was found to be significant determinant for poor quality of sleep                                                                                                                            |                                                                                                      |

|                |                                                                         |                                           |                                                                                  |                                                                   |
|----------------|-------------------------------------------------------------------------|-------------------------------------------|----------------------------------------------------------------------------------|-------------------------------------------------------------------|
|                | population of two villages in rural Puducherry, India                   |                                           |                                                                                  |                                                                   |
| Zvolensky 2021 | Cross-sectional 401 Latinx college students 18-25y from a US university | Subjective social status (McArthur scale) | Insomnia (insomnia subscale of the Inventory of Depression and Anxiety Symptoms) | Lower subjective social status predicted higher insomnia symptoms |

SES = socio-economic status, PSQI = Pittsburgh Sleep Quality Index, DSM = Diagnostic and Statistical Manual of Mental Disorders, SDB = sleep-disordered breathing, BMI = body mass index, ESS = Epworth Sleepiness Scale, EDS = excessive daytime sleepiness, WASO = wake after sleep onset, NIH = National Institutes of Health, IRLSSG = International Restless Legs Syndrome Study Group, RLS = restless legs syndrome, OSA = obstructive sleep apnea, ICD = International Statistical Classification of Diseases and Related Health Problems, PSG = polysomnography, AHI = apnea-hypopnea index, NREM = non-rapid eye movement, EEG = electroencephalogram, ESOMAR = European Society for Opinion and Marketing Research, SWS = slow-wave sleep, ICSED = International Standard Classification of Education, ICSD = International Classification of Sleep Disorders, BISS = behaviorally induced insufficient sleep syndrome, AIS = Athens Insomnia Scale, DIMS = difficulty initiating or maintaining sleep, TIB = time in bed, ASPD = advanced sleep phase disorder, DSPD = delayed sleep phase disorder, WHO = World Health Organization, REM = rapid eye movement, RBD = REM sleep behavior disorder, ISI = Insomnia Severity Index, ODI = oxygen desaturation index.

**Table S2**—Quality assessment of included studies according to NHLBI’s Quality Assessment Tool for Observational Cohort and Cross-Sectional Studies.

| Study           | Q1 | Q2 | Q3 | Q4 | Q5 | Q6 | Q7 | Q8 | Q9 | Q10 | Q11 | Q12 | Q13 | Q14 | Quality rating |
|-----------------|----|----|----|----|----|----|----|----|----|-----|-----|-----|-----|-----|----------------|
| Hapte-Gabr 1991 | Y  | Y  | Y  | Y  | N  | N  | N  | Y  | Y  | N   | N   | NA  | NA  | Y   | Fair           |
| Moffitt 1991    | Y  | Y  | Y  | Y  | N  | N  | N  | N  | Y  | N   | N   | NA  | NA  | Y   | Fair           |
| Weyerer 1991    | Y  | Y  | Y  | Y  | N  | N  | N  | N  | Y  | N   | N   | NA  | NA  | N   | Poor           |
| Hopton 1992     | Y  | Y  | N  | Y  | N  | N  | N  | Y  | Y  | N   | N   | NA  | NA  | N   | Poor           |
| Kim 1994        | Y  | Y  | Y  | Y  | N  | N  | N  | Y  | Y  | N   | N   | NA  | NA  | Y   | Fair           |
| Blazer 1995     | Y  | Y  | Y  | Y  | N  | N  | N  | N  | Y  | N   | N   | NA  | NA  | Y   | Fair           |
| Geroldi 1996    | Y  | N  | N  | Y  | N  | N  | N  | Y  | Y  | N   | N   | NA  | NA  | Y   | Poor           |
| Ohayon 1996     | Y  | Y  | Y  | Y  | N  | N  | N  | N  | Y  | N   | N   | NA  | NA  | Y   | Fair           |
| Rásky 1996      | Y  | Y  | Y  | Y  | N  | N  | N  | N  | Y  | N   | N   | NA  | NA  | Y   | Fair           |
| Breslau 1997    | Y  | Y  | Y  | Y  | N  | N  | N  | Y  | Y  | N   | N   | NA  | NA  | Y   | Fair           |
| Fabsitz 1997    | Y  | Y  | Y  | Y  | N  | N  | N  | N  | Y  | N   | N   | NA  | NA  | Y   | Fair           |
| Rona 1997       | Y  | Y  | Y  | Y  | N  | N  | N  | Y  | Y  | N   | Y   | NA  | NA  | Y   | Good           |
| Schechtman 1997 | Y  | Y  | NA | N  | N  | N  | N  | N  | Y  | N   | N   | NA  | NA  | Y   | Poor           |
| Rona 1998       | Y  | Y  | Y  | Y  | N  | N  | N  | Y  | Y  | N   | N   | NA  | NA  | Y   | Fair           |
| Talvi 1998      | Y  | Y  | Y  | Y  | N  | N  | N  | Y  | Y  | N   | N   | NA  | NA  | Y   | Fair           |
| Hall 1999       | Y  | Y  | NR | Y  | N  | N  | N  | Y  | Y  | N   | N   | NA  | NA  | Y   | Fair           |
| Roberts 1999    | Y  | Y  | Y  | Y  | N  | Y  | Y  | N  | Y  | N   | N   | NA  | Y   | Y   | Good           |
| Adler 2000      | Y  | N  | NR | Y  | N  | N  | N  | Y  | N  | N   | N   | NA  | NA  | N   | Poor           |
| Ito 2000        | Y  | Y  | N  | Y  | N  | N  | N  | N  | Y  | N   | N   | NA  | NA  | Y   | Poor           |
| Phillips 2000   | Y  | Y  | Y  | Y  | N  | N  | N  | N  | Y  | N   | N   | NA  | NA  | Y   | Fair           |
| Sadeh 2000      | Y  | N  | Y  | Y  | N  | N  | N  | N  | Y  | N   | Y   | Y   | NA  | Y   | Fair           |
| Gallant 2001    | Y  | Y  | Y  | Y  | N  | N  | Y  | N  | Y  | N   | N   | NA  | N   | Y   | Fair           |
| Hublin 2001     | Y  | Y  | Y  | Y  | N  | N  | N  | Y  | Y  | N   | N   | NA  | NA  | Y   | Fair           |
| Ohida 2001      | Y  | Y  | Y  | Y  | N  | N  | N  | N  | Y  | N   | N   | NA  | NA  | Y   | Fair           |
| Pallesen 2001   | Y  | Y  | Y  | Y  | N  | N  | N  | N  | Y  | N   | Y   | NA  | NA  | Y   | Fair           |
| Sutton 2001     | Y  | Y  | Y  | Y  | N  | N  | N  | Y  | Y  | N   | N   | NA  | NA  | Y   | Fair           |
| Åkerstedt 2002  | Y  | Y  | Y  | Y  | N  | N  | N  | Y  | Y  | N   | N   | NA  | NA  | Y   | Fair           |

|                          |   |   |    |   |   |   |   |    |   |   |   |    |    |   |      |
|--------------------------|---|---|----|---|---|---|---|----|---|---|---|----|----|---|------|
| Li 2002                  | Y | Y | Y  | Y | N | N | N | Y  | Y | N | N | NA | NA | Y | Fair |
| Moore 2002               | Y | Y | Y  | Y | N | N | N | Y  | Y | N | N | NA | NA | Y | Fair |
| Ohayon 2002              | Y | N | Y  | Y | N | N | N | Y  | Y | N | N | NA | NA | Y | Fair |
| Rocha 2002               | Y | Y | Y  | Y | Y | N | N | Y  | Y | N | N | NA | NA | Y | Good |
| Chervin 2003             | Y | Y | N  | Y | N | N | N | NA | Y | N | N | NA | NA | N | Poor |
| Doi 2003a                | Y | Y | Y  | Y | N | N | N | N  | Y | N | N | NA | NA | Y | Fair |
| Doi 2003b                | Y | Y | Y  | Y | N | N | N | N  | Y | N | N | NA | NA | Y | Fair |
| Kravitz 2003             | Y | Y | N  | Y | N | N | N | Y  | Y | N | N | NA | NA | Y | Fair |
| Larsson 2003             | Y | N | Y  | Y | N | N | N | N  | Y | N | N | NA | NA | N | Poor |
| Hara 2004                | Y | Y | Y  | Y | N | N | N | Y  | Y | N | N | NA | NA | N | Fair |
| Paine 2004               | Y | Y | Y  | Y | N | N | N | Y  | N | N | N | NA | NA | Y | Fair |
| Roberts 2004             | Y | Y | Y  | Y | N | N | N | Y  | N | N | Y | NA | NA | Y | Fair |
| Su 2004                  | Y | Y | Y  | Y | N | N | N | N  | Y | N | Y | NA | NA | N | Fair |
| Terzano 2004             | Y | N | NR | Y | N | N | N | N  | Y | N | N | NA | NA | Y | Poor |
| Acebo 2005               | Y | N | NR | Y | N | N | N | Y  | Y | N | Y | N  | NA | Y | Poor |
| Averina 2005             | Y | Y | Y  | Y | N | N | N | Y  | Y | N | N | NA | NA | Y | Fair |
| Chen 2005                | Y | Y | Y  | Y | N | N | N | Y  | Y | N | N | NA | NA | Y | Fair |
| Fass 2005                | Y | Y | Y  | N | N | N | N | N  | Y | N | Y | NA | NA | Y | Fair |
| Gander 2005              | Y | Y | Y  | Y | N | N | N | Y  | N | N | N | NA | NA | Y | Fair |
| Gellis 2005              | Y | Y | N  | Y | N | N | N | Y  | Y | N | Y | NA | NA | Y | Fair |
| Hale 2005                | Y | Y | Y  | Y | N | N | N | Y  | Y | N | N | NA | NA | Y | Fair |
| Hsu 2005                 | Y | N | Y  | Y | N | N | N | N  | Y | N | N | NA | NA | Y | Poor |
| Kim 2005                 | Y | Y | NR | Y | N | N | N | N  | Y | N | N | NA | NA | Y | Poor |
| McLaughlin Crabtree 2005 | Y | Y | N  | N | N | N | N | N  | N | N | N | NA | NA | Y | Poor |
| Ohayon 2005              | Y | Y | Y  | Y | N | N | N | Y  | Y | N | N | NA | NA | Y | Fair |
| Phillips 2005            | Y | Y | NR | Y | N | N | N | Y  | Y | N | N | NA | NA | Y | Fair |
| Tjepkema 2005            | Y | Y | Y  | Y | N | N | N | Y  | Y | N | N | NA | NA | Y | Fair |
| Tworoger 2005            | Y | Y | Y  | Y | N | N | N | N  | Y | N | Y | NR | NA | Y | Fair |
| Ursin 2005               | Y | Y | Y  | Y | N | N | N | N  | Y | N | N | NA | NA | Y | Fair |
| BaHammam 2006            | Y | Y | Y  | Y | N | N | N | N  | Y | N | N | NA | NA | N | Poor |
| Kronholm 2006            | Y | Y | Y  | Y | N | N | N | Y  | Y | N | N | NA | NA | Y | Fair |



|                 |   |   |    |   |    |   |   |   |   |    |   |    |    |    |      |
|-----------------|---|---|----|---|----|---|---|---|---|----|---|----|----|----|------|
| Lauderdale 2006 | Y | Y | Y  | Y | N  | N | N | Y | Y | N  | Y | NR | NA | Y  | Fair |
| Sekine 2006     | Y | Y | Y  | Y | N  | N | N | Y | Y | N  | N | NA | NA | Y  | Fair |
| Adam 2007       | Y | Y | Y  | Y | N  | N | N | N | Y | N  | N | NA | NA | Y  | Fair |
| Friedman 2007   | Y | Y | N  | Y | N  | N | N | Y | Y | N  | Y | NR | NA | Y  | Fair |
| Ozden 2007      | Y | N | Y  | Y | N  | N | N | N | Y | N  | Y | NA | NA | Y  | Fair |
| Rangarajan 2007 | Y | Y | Y  | Y | Y  | N | N | N | Y | N  | Y | NA | NA | Y  | Good |
| Stamatakis 2007 | Y | Y | Y  | Y | N  | N | N | Y | Y | Y  | N | NA | Y  | Y  | Good |
| Baigi 2008      | Y | Y | Y  | Y | N  | N | N | N | Y | N  | N | NA | NA | Y  | Fair |
| Blay 2008       | Y | Y | Y  | Y | N  | N | N | N | Y | N  | N | NA | NA | Y  | Fair |
| Ekici 2008      | Y | Y | Y  | Y | N  | N | N | N | Y | N  | N | NA | NA | Y  | Fair |
| Inan 2008       | Y | Y | Y  | Y | Y  | N | N | N | Y | N  | Y | NA | NA | N  | Fair |
| Jean-Louis 2008 | Y | N | NR | Y | N  | N | N | Y | Y | N  | N | NA | NA | Y  | Poor |
| Kuehni 2008     | Y | N | Y  | Y | N  | N | N | Y | Y | N  | N | NA | NA | Y  | Fair |
| Li 2008         | Y | Y | NA | Y | NA | Y | Y | Y | Y | CD | Y | NA | NA | Y  | Good |
| Mezick 2008     | Y | Y | Y  | Y | N  | N | N | Y | Y | N  | Y | NR | NA | Y  | Fair |
| Roberts 2008    | Y | Y | Y  | Y | N  | Y | Y | Y | Y | N  | Y | NA | N  | Y  | Good |
| Virtanen 2008   | Y | Y | N  | Y | N  | N | Y | Y | Y | Y  | N | NA | Y  | Y  | Good |
| Xiang 2008      | Y | Y | Y  | Y | N  | N | N | Y | Y | N  | N | NA | NA | Y  | Fair |
| Yao 2008        | Y | N | Y  | Y | N  | N | N | Y | Y | N  | N | NA | NA | Y  | Fair |
| Arber 2009      | Y | Y | Y  | Y | N  | N | N | Y | Y | N  | N | NA | NA | Y  | Fair |
| Baker 2009      | Y | Y | N  | Y | N  | N | N | Y | Y | N  | N | NA | NA | Y  | Fair |
| Cho 2009        | Y | N | Y  | Y | Y  | N | N | Y | Y | N  | N | NA | NA | Y  | Fair |
| Hall 2009       | Y | Y | NR | N | N  | N | N | Y | Y | N  | Y | Y  | NA | Y  | Fair |
| Jiang 2009      | Y | Y | Y  | Y | N  | N | N | N | Y | N  | N | NA | NA | Y  | Fair |
| Joo 2009        | Y | Y | N  | Y | N  | N | N | Y | Y | N  | N | NA | NA | Y  | Fair |
| Kim 2009        | Y | Y | Y  | Y | N  | Y | Y | N | Y | N  | N | NA | N  | Y  | Fair |
| Krueger 2009    | Y | Y | Y  | Y | N  | N | N | Y | Y | N  | N | NA | NA | Y  | Fair |
| Reddy 2009      | Y | Y | Y  | Y | N  | N | N | Y | Y | N  | Y | Y  | NA | Y  | Good |
| Sivertsen 2009  | Y | Y | Y  | Y | N  | N | N | Y | Y | N  | N | NA | NA | Y  | Fair |
| Vincent 2009    | Y | Y | NR | Y | N  | N | N | Y | Y | N  | N | NA | NA | Y  | Fair |
| Yang 2009       | Y | Y | Y  | Y | N  | N | N | Y | Y | N  | N | NA | NA | CD | Fair |

|                      |   |   |    |   |    |   |   |   |   |   |   |    |    |   |      |
|----------------------|---|---|----|---|----|---|---|---|---|---|---|----|----|---|------|
| Fritsch Montero 2010 | Y | Y | Y  | Y | N  | N | N | Y | Y | N | N | NA | NA | Y | Fair |
| Goodin 2010          | Y | N | NR | Y | N  | N | N | Y | N | N | N | NA | NA | Y | Poor |
| Grandner 2010        | Y | Y | Y  | Y | N  | N | N | Y | Y | N | N | NA | NA | Y | Fair |
| Gu 2010              | Y | Y | Y  | Y | N  | N | N | N | Y | N | N | NA | NA | Y | Fair |
| Knutson 2010         | Y | Y | Y  | Y | N  | N | N | Y | Y | N | N | NA | NA | Y | Fair |
| Lallukka 2010        | Y | Y | Y  | Y | N  | N | N | Y | Y | N | N | NA | NA | Y | Fair |
| Li S 2010            | Y | Y | Y  | Y | N  | N | N | Y | Y | N | N | NA | NA | Y | Fair |
| Li SX 2010           | Y | Y | Y  | Y | N  | N | N | Y | Y | N | Y | NA | NA | Y | Good |
| Meltzer 2010         | Y | Y | NA | Y | NA | N | N | Y | N | N | Y | Y  | NA | Y | Fair |
| Mittelmark 2010      | Y | Y | Y  | Y | N  | N | N | Y | Y | N | N | NA | NA | Y | Fair |
| Nomura 2010          | Y | Y | Y  | Y | N  | N | N | Y | Y | N | N | NA | NA | Y | Fair |
| Paparrigopoulos 2010 | Y | Y | N  | Y | N  | N | N | Y | Y | N | N | NA | NA | Y | Fair |
| Park 2010            | Y | Y | Y  | Y | N  | N | N | Y | Y | N | N | NA | NA | Y | Fair |
| Patel 2010           | Y | Y | N  | Y | N  | N | N | Y | Y | N | N | NA | NA | Y | Fair |
| Tomfohr 2010         | Y | N | NA | Y | N  | N | N | N | Y | N | Y | NR | NA | Y | Poor |
| Tufik 2010           | Y | Y | Y  | Y | Y  | N | N | Y | Y | N | Y | NR | NA | Y | Good |
| Amra 2011            | Y | N | Y  | Y | N  | N | N | Y | Y | N | N | NA | NA | Y | Fair |
| Arakane 2011         | Y | Y | Y  | Y | Y  | N | N | N | Y | N | N | NA | NA | Y | Fair |
| Arman 2011           | Y | Y | Y  | Y | Y  | N | N | Y | Y | N | N | NA | NA | Y | Good |
| Bonuck 2011          | Y | Y | Y  | Y | N  | N | N | N | Y | Y | N | NA | N  | Y | Fair |
| Eder 2011            | Y | Y | Y  | Y | N  | N | N | Y | Y | N | N | NA | NA | Y | Fair |
| Hense 2011           | Y | Y | Y  | Y | N  | N | N | Y | Y | N | N | NA | NA | Y | Fair |
| Li 2011              | Y | Y | Y  | Y | N  | N | N | Y | Y | N | Y | NA | NA | Y | Good |
| McHale 2011          | Y | N | Y  | Y | N  | N | N | N | Y | N | N | NA | NA | Y | Poor |
| Moore 2011           | Y | Y | Y  | Y | N  | N | N | Y | Y | N | Y | Y  | NA | Y | Good |
| Pallesen 2011        | Y | N | Y  | Y | N  | N | N | Y | Y | N | Y | NA | NA | Y | Fair |
| Pigeon 2011          | Y | N | Y  | Y | N  | N | N | Y | Y | N | N | NA | NA | N | Poor |
| Ryu 2011             | Y | Y | NR | Y | N  | N | N | Y | Y | N | N | NA | NA | Y | Fair |
| Wong 2011            | Y | Y | N  | Y | Y  | N | N | Y | Y | N | N | NA | NA | Y | Fair |
| Zhang 2011           | Y | Y | Y  | Y | N  | Y | Y | N | Y | N | N | NA | N  | Y | Fair |
| Adams 2012           | Y | Y | Y  | Y | N  | N | N | Y | Y | N | N | NA | NA | N | Fair |

|                  |   |   |    |   |    |    |   |   |   |   |   |    |    |   |      |
|------------------|---|---|----|---|----|----|---|---|---|---|---|----|----|---|------|
| Blümel 2012      | Y | N | Y  | Y | Y  | N  | N | N | Y | N | N | NA | NA | Y | Fair |
| Bøe 2012         | Y | Y | Y  | Y | N  | N  | N | Y | Y | N | N | NA | NA | N | Fair |
| Brug 2012        | Y | Y | Y  | Y | N  | N  | N | N | Y | N | N | NA | NA | N | Poor |
| Calem 2012       | Y | Y | Y  | Y | N  | N  | N | Y | Y | N | Y | NA | NA | Y | Good |
| Green 2012       | Y | Y | Y  | Y | N  | N  | Y | N | Y | N | N | NA | N  | Y | Fair |
| Guo 2012         | Y | Y | Y  | Y | N  | N  | N | Y | Y | N | N | NA | NA | Y | Fair |
| Heilemann 2012   | Y | Y | Y  | Y | N  | N  | N | N | Y | N | N | NA | NA | N | Poor |
| Kachikis 2012    | Y | Y | NR | Y | N  | N  | N | Y | Y | N | N | NA | NA | Y | Fair |
| Lallukka 2012    | Y | Y | Y  | Y | N  | N  | N | Y | Y | N | N | NA | NA | Y | Fair |
| Lima 2012        | Y | Y | Y  | Y | Y  | N  | N | Y | Y | N | N | NA | NA | Y | Good |
| Marco 2012       | Y | N | Y  | Y | N  | N  | N | Y | Y | N | Y | NR | NA | Y | Fair |
| Mazzotti 2012    | Y | Y | Y  | Y | N  | N  | N | Y | Y | N | N | NA | NA | Y | Fair |
| Nicholson 2012   | Y | Y | Y  | Y | N  | N  | N | Y | Y | N | N | NA | NA | Y | Fair |
| Nishikitani 2012 | Y | Y | N  | Y | N  | N  | N | N | Y | N | N | NA | NA | Y | Poor |
| Rosenbaum 2012   | Y | Y | Y  | Y | N  | N  | N | Y | Y | N | N | NA | NA | Y | Fair |
| Soltani 2012     | Y | Y | Y  | Y | N  | N  | N | Y | Y | N | N | NA | NA | N | Fair |
| Stranges 2012    | Y | Y | Y  | Y | N  | N  | N | Y | Y | N | N | NA | NA | Y | Fair |
| Talala 2012      | Y | Y | Y  | Y | N  | N  | N | Y | Y | N | N | NA | NA | Y | Fair |
| Tu 2012          | Y | Y | Y  | Y | N  | N  | N | Y | Y | N | N | NA | NA | Y | Fair |
| Wall 2012        | Y | Y | NA | Y | NA | N  | N | Y | N | N | Y | NA | NA | Y | Fair |
| Zhang 2012       | Y | Y | Y  | Y | N  | Y  | Y | N | Y | N | N | NA | N  | Y | Fair |
| Ansarin 2013     | Y | Y | Y  | Y | N  | N  | N | Y | Y | N | N | NA | NA | Y | Fair |
| Biggs 2013       | Y | Y | N  | Y | N  | N  | N | Y | N | N | N | NA | NA | Y | Poor |
| Chen 2013        | Y | Y | NR | Y | N  | N  | N | Y | Y | N | N | NA | NA | Y | Fair |
| El-Sheikh 2013   | Y | Y | N  | Y | N  | N  | N | Y | Y | N | Y | NR | NA | N | Poor |
| Grandner 2013    | Y | Y | Y  | Y | N  | N  | N | Y | Y | N | N | NA | NA | Y | Fair |
| Hartz 2013       | Y | Y | NR | Y | N  | N  | N | Y | Y | N | N | NA | NA | Y | Fair |
| Hoefelmann 2013  | Y | Y | NR | Y | Y  | N  | N | Y | Y | N | N | NA | NA | Y | Fair |
| Hsu 2013         | Y | Y | NA | Y | NA | CD | N | Y | Y | N | Y | NA | NA | Y | Good |
| Innes 2013       | Y | N | Y  | Y | N  | N  | N | Y | Y | N | Y | NA | NA | Y | Fair |
| Jarrin 2013      | Y | N | NA | Y | N  | N  | N | Y | Y | N | N | NA | NA | Y | Poor |

|                     |   |   |    |   |   |   |   |   |   |   |   |    |    |   |      |
|---------------------|---|---|----|---|---|---|---|---|---|---|---|----|----|---|------|
| Kidwai 2013         | Y | Y | Y  | Y | N | N | N | Y | Y | N | N | NA | NA | Y | Fair |
| Kim 2013            | Y | Y | Y  | Y | N | N | N | N | Y | N | Y | NA | NA | Y | Fair |
| Luo 2013            | Y | Y | Y  | Y | N | N | N | N | Y | N | N | NA | NA | Y | Fair |
| Mindell 2013        | Y | Y | NA | Y | N | N | N | Y | Y | N | N | NA | NA | Y | Fair |
| Yoshioka 2013       | Y | Y | N  | Y | N | N | N | Y | Y | N | N | NA | NA | Y | Fair |
| Anders 2014         | Y | Y | Y  | Y | N | N | N | Y | Y | N | N | NA | NA | Y | Fair |
| Basner 2014         | Y | Y | Y  | Y | N | N | N | Y | Y | N | N | NA | NA | Y | Fair |
| Carrillo-Larco 2014 | Y | Y | Y  | Y | N | N | N | Y | Y | N | N | NA | NA | Y | Fair |
| Gjevre 2014         | Y | Y | N  | Y | N | N | N | Y | Y | N | N | NA | NA | Y | Fair |
| Gubelmann 2014      | Y | Y | Y  | Y | N | N | N | Y | Y | N | N | NA | NA | Y | Fair |
| Jarrin 2014         | Y | N | NA | Y | N | N | N | Y | Y | N | N | NA | NA | Y | Poor |
| Kang 2014           | Y | Y | NR | Y | N | N | N | Y | Y | N | N | NA | NA | Y | Fair |
| Karaman 2014        | Y | N | NR | Y | Y | N | N | N | Y | N | N | NA | NA | Y | Poor |
| Leng 2014           | Y | Y | Y  | Y | N | N | N | Y | Y | N | N | NA | NA | Y | Fair |
| Liviya NG 2014      | Y | Y | NR | Y | N | N | N | Y | Y | N | N | NA | NA | Y | Fair |
| McDonald 2014       | Y | Y | Y  | Y | N | N | N | N | Y | N | N | NA | NA | Y | Fair |
| Paine 2014          | Y | Y | Y  | Y | N | N | N | Y | N | N | Y | NA | NA | Y | Fair |
| Pallesen 2014       | Y | Y | Y  | Y | N | N | N | N | Y | N | Y | NA | NA | Y | Fair |
| Pan 2014            | Y | Y | Y  | Y | N | N | N | Y | Y | N | N | NA | NA | Y | Fair |
| Seib 2014           | Y | Y | N  | Y | N | N | N | Y | Y | N | N | NA | NA | N | Poor |
| Speirs 2014         | Y | Y | Y  | Y | N | N | N | Y | Y | N | N | NA | NA | Y | Fair |
| Takahashi 2014      | Y | Y | Y  | Y | N | N | N | Y | Y | N | Y | NR | NA | Y | Fair |
| Uhlig 2014          | Y | Y | N  | Y | N | N | N | N | Y | N | Y | NA | NA | Y | Fair |
| Whinnery 2014       | Y | Y | Y  | Y | N | N | N | Y | Y | N | N | NA | NA | Y | Fair |
| Bagley 2015         | Y | Y | Y  | Y | N | N | N | Y | Y | N | Y | Y  | NA | Y | Good |
| Baiden 2015         | Y | Y | NR | Y | N | N | N | Y | Y | N | N | NA | NA | Y | Fair |
| Benbir 2015         | Y | Y | Y  | Y | N | N | N | Y | Y | N | Y | NA | NA | Y | Good |
| Bonke 2015          | Y | Y | Y  | Y | N | N | N | Y | Y | N | N | NA | NA | Y | Fair |
| Buxton 2015         | Y | Y | N  | Y | N | N | N | N | Y | N | N | NA | NA | Y | Poor |
| Cunningham 2015     | Y | Y | Y  | Y | N | N | N | Y | Y | N | N | NA | NA | Y | Fair |
| Ding 2015           | Y | Y | Y  | Y | N | N | N | Y | N | N | N | NA | NA | Y | Fair |

|                     |   |   |    |   |   |   |   |   |   |   |   |    |    |   |      |
|---------------------|---|---|----|---|---|---|---|---|---|---|---|----|----|---|------|
| El-Sheikh 2015      | Y | Y | Y  | Y | N | N | N | Y | Y | N | Y | Y  | NA | Y | Good |
| Gamaldo 2015        | Y | Y | Y  | Y | N | N | N | N | Y | N | N | NA | NA | Y | Fair |
| Katainen 2015       | Y | N | Y  | Y | N | N | N | Y | Y | N | N | NA | NA | Y | Fair |
| Kim 2015            | Y | Y | Y  | Y | N | N | N | N | Y | N | N | NA | NA | Y | Fair |
| Kurina 2015         | Y | Y | Y  | Y | N | N | N | Y | Y | N | Y | NR | NA | Y | Fair |
| Nisar 2015          | Y | Y | Y  | Y | N | N | N | Y | Y | N | N | NA | NA | Y | Fair |
| Patel 2015          | Y | Y | N  | Y | N | N | N | Y | Y | N | N | NA | NA | Y | Fair |
| Peltzer 2015        | Y | Y | Y  | Y | N | N | N | Y | Y | N | N | NA | NA | Y | Fair |
| Schwartz 2015       | Y | Y | N  | Y | N | N | N | Y | Y | N | N | NA | NA | Y | Fair |
| Sivertsen 2015      | Y | Y | N  | Y | N | N | N | Y | Y | N | Y | NA | NA | N | Fair |
| Stringhini 2015     | Y | Y | Y  | Y | N | N | N | Y | Y | N | Y | NR | NA | Y | Fair |
| Suarez 2015         | Y | Y | Y  | Y | N | N | N | Y | Y | N | N | NA | NA | Y | Fair |
| van de Straat 2015  | Y | Y | N  | Y | N | N | N | Y | Y | N | N | NA | NA | Y | Fair |
| Yoon 2015           | Y | Y | NR | Y | N | N | N | Y | Y | N | N | NA | NA | Y | Fair |
| Zapata Roblyer 2015 | Y | N | NR | Y | N | N | N | Y | Y | N | N | NA | NA | Y | Poor |
| Danielsson 2016     | Y | Y | Y  | Y | N | N | N | N | Y | N | Y | NA | NA | N | Fair |
| de Jong 2016        | Y | Y | NR | Y | N | N | N | N | Y | N | Y | NR | NA | N | Poor |
| de Ruiter 2016      | Y | Y | Y  | Y | N | N | N | Y | Y | N | N | NA | NA | Y | Fair |
| Hawkins 2016        | Y | Y | N  | Y | N | N | N | Y | Y | N | N | NA | NA | Y | Fair |
| Heshmat 2016        | Y | Y | Y  | Y | Y | N | N | Y | Y | N | N | NA | NA | Y | Good |
| Johnson 2016        | Y | Y | Y  | Y | N | N | N | Y | Y | N | N | NA | NA | Y | Fair |
| Malone 2016         | Y | Y | N  | Y | N | N | N | Y | Y | N | N | NA | NA | Y | Fair |
| Paine 2016a         | Y | Y | Y  | Y | N | N | N | Y | Y | N | N | NA | NA | Y | Fair |
| Paine 2016b         | Y | Y | Y  | Y | N | N | N | Y | N | N | N | NA | NA | Y | Fair |
| Peltzer 2016        | Y | Y | Y  | Y | N | N | N | Y | Y | N | N | NA | NA | Y | Fair |
| Peña 2016           | Y | Y | Y  | Y | N | Y | Y | Y | Y | N | N | NA | N  | Y | Good |
| Safak 2016          | Y | Y | NR | Y | N | N | N | Y | Y | N | Y | NA | NA | Y | Fair |
| Schäfer 2016        | Y | Y | Y  | Y | N | N | N | Y | Y | Y | N | NA | NA | Y | Good |
| Seyedmehdi 2016     | Y | Y | Y  | Y | N | N | N | N | Y | N | N | NA | NA | Y | Fair |
| Smagula 2016        | Y | Y | Y  | Y | N | Y | Y | Y | Y | N | N | NA | NR | Y | Good |
| Tareque 2016        | Y | Y | N  | Y | N | N | N | N | Y | N | N | NA | NA | Y | Poor |

|                  |   |   |    |   |   |   |   |   |   |   |   |    |    |   |      |
|------------------|---|---|----|---|---|---|---|---|---|---|---|----|----|---|------|
| Wong 2016        | Y | Y | Y  | Y | N | N | N | Y | Y | N | N | NA | NA | Y | Fair |
| Abraham 2017     | Y | Y | N  | Y | N | N | N | Y | Y | N | N | NA | NA | Y | Fair |
| Ahmed 2017       | Y | Y | Y  | Y | N | N | N | Y | Y | N | Y | NA | NA | Y | Good |
| Assari 2017      | Y | Y | Y  | Y | N | Y | Y | Y | Y | N | N | NA | NR | Y | Good |
| Bapat 2017       | Y | N | NR | N | N | N | N | Y | Y | N | N | NA | NA | Y | Poor |
| Barazzetta 2017  | Y | Y | Y  | Y | N | N | N | Y | Y | Y | N | NA | N  | Y | Fair |
| Brambilla 2017   | Y | Y | NR | Y | N | N | N | N | Y | N | N | NA | NA | N | Poor |
| Cheng 2017       | Y | Y | Y  | Y | N | N | Y | N | Y | N | N | NA | N  | Y | Fair |
| Clark 2017       | Y | Y | Y  | Y | N | N | N | Y | Y | N | N | NA | NA | N | Fair |
| Costanian 2017   | Y | Y | Y  | Y | N | N | N | Y | Y | N | N | NA | NA | Y | Fair |
| Didriksen 2017   | Y | Y | Y  | Y | N | N | N | N | Y | N | Y | NA | NA | Y | Fair |
| Foroughi 2017    | Y | N | NR | Y | N | N | N | Y | Y | N | N | NA | NA | Y | Poor |
| Fulgencio 2017   | Y | N | NR | Y | Y | N | N | N | Y | N | N | NA | NA | N | Poor |
| Grandner 2017    | Y | Y | Y  | Y | N | N | N | Y | Y | N | Y | NA | NA | Y | Good |
| Ham 2017         | Y | Y | Y  | Y | N | N | N | N | Y | N | N | NA | NA | Y | Fair |
| Hardy 2017       | Y | Y | Y  | Y | Y | N | N | N | N | N | N | NA | NA | Y | Fair |
| Kim 2017         | Y | Y | NR | Y | N | N | N | N | Y | N | N | NA | NA | Y | Poor |
| Koolhaas 2017    | Y | Y | Y  | Y | N | N | N | Y | Y | N | Y | Y  | NA | Y | Good |
| Ma JF 2017       | Y | Y | Y  | Y | N | N | N | Y | Y | N | N | NA | NA | Y | Fair |
| Ma Y 2017        | Y | Y | NR | Y | N | N | N | Y | Y | N | N | NA | NA | Y | Fair |
| Maume 2017       | Y | Y | Y  | Y | N | N | Y | N | Y | Y | N | NA | NR | Y | Fair |
| McDowall 2017    | Y | Y | Y  | Y | N | N | N | N | Y | N | N | NA | NA | N | Poor |
| Mota-Veloso 2017 | Y | N | Y  | Y | Y | N | N | Y | Y | N | Y | NA | NA | Y | Good |
| Netsi 2017       | Y | Y | Y  | Y | N | Y | Y | Y | Y | N | N | NA | Y  | Y | Good |
| Palmer 2017      | Y | Y | N  | Y | Y | N | N | Y | Y | N | N | NA | NA | Y | Fair |
| Patte 2017       | Y | Y | Y  | Y | N | Y | Y | Y | N | N | N | NA | N  | Y | Fair |
| Perales 2017     | Y | Y | Y  | Y | N | N | N | Y | Y | N | N | NA | NA | Y | Fair |
| Seo 2017         | Y | Y | NR | Y | N | N | N | Y | Y | N | N | NA | NA | Y | Fair |
| Sivertsen 2017   | Y | Y | N  | Y | N | Y | Y | Y | Y | Y | N | NA | NA | Y | Good |
| Tang 2017        | Y | Y | Y  | Y | N | N | N | N | Y | N | N | NA | NA | Y | Fair |
| Walsemann 2017   | Y | Y | Y  | Y | N | N | Y | Y | Y | Y | N | NA | Y  | Y | Good |

|                   |   |   |    |   |   |    |   |   |   |   |   |    |    |   |      |
|-------------------|---|---|----|---|---|----|---|---|---|---|---|----|----|---|------|
| Wang 2017         | Y | Y | Y  | Y | Y | N  | N | Y | Y | N | N | NA | NA | Y | Good |
| Yu 2017           | Y | Y | NA | Y | N | N  | N | Y | Y | N | N | NA | NA | Y | Fair |
| Yunus 2017        | Y | Y | Y  | Y | N | N  | N | Y | Y | N | N | NA | NA | Y | Fair |
| Zhang 2017        | Y | Y | NR | Y | Y | N  | N | Y | Y | N | N | NA | NA | Y | Fair |
| Berhanu 2018      | Y | Y | Y  | Y | Y | N  | N | Y | Y | N | N | NA | NA | Y | Good |
| Cha 2018          | Y | Y | NR | Y | N | N  | N | Y | Y | N | N | NA | NA | Y | Fair |
| Chang 2018        | Y | Y | Y  | Y | N | N  | N | Y | Y | N | N | NA | NA | Y | Fair |
| Counts 2018       | Y | N | NR | Y | N | N  | N | Y | N | N | N | NA | NA | Y | Poor |
| de Jonge 2018     | Y | N | Y  | Y | N | N  | Y | N | Y | N | N | NA | N  | Y | Poor |
| de Lima 2018      | Y | Y | NR | Y | Y | N  | N | Y | Y | N | N | NA | NA | Y | Fair |
| Dong 2018         | Y | Y | Y  | Y | N | N  | N | Y | Y | N | N | NA | NA | Y | Fair |
| Gómez-Olivé 2018  | Y | Y | Y  | Y | N | N  | N | Y | Y | N | N | NA | NA | Y | Fair |
| Goyal 2018        | Y | Y | Y  | Y | Y | N  | N | N | Y | N | N | NA | NA | N | Fair |
| Jaisoorya 2018    | Y | Y | Y  | Y | Y | N  | N | N | Y | N | N | NA | NA | Y | Fair |
| Khan 2018         | Y | N | NR | Y | Y | N  | N | Y | Y | N | N | NA | NA | N | Poor |
| Lima 2018         | Y | Y | Y  | Y | Y | N  | N | Y | Y | N | N | NA | NA | Y | Good |
| Lin 2018          | Y | Y | Y  | Y | N | Y  | Y | N | Y | N | N | NA | N  | Y | Fair |
| Ma J 2018         | Y | Y | NR | Y | N | N  | N | Y | Y | N | N | NA | NA | Y | Fair |
| Ma Y 2018         | Y | Y | Y  | Y | N | N  | N | Y | Y | N | N | NA | NA | Y | Fair |
| Manyanga 2018     | Y | Y | NR | Y | Y | N  | N | Y | Y | N | Y | Y  | NA | Y | Good |
| Matthews 2018     | Y | Y | Y  | N | N | CD | N | Y | Y | Y | Y | Y  | NA | Y | Good |
| Meneton 2018      | Y | Y | N  | Y | N | Y  | Y | Y | Y | N | N | NA | N  | Y | Fair |
| Miner 2018        | Y | Y | Y  | Y | N | N  | N | N | Y | N | N | NA | NA | Y | Fair |
| Olorunmoteni 2018 | Y | N | Y  | Y | N | N  | N | Y | Y | N | N | NA | NA | Y | Fair |
| Park 2018         | Y | Y | Y  | Y | N | N  | N | N | Y | N | N | NA | NA | Y | Fair |
| Peltzer 2018      | Y | Y | Y  | Y | N | N  | N | Y | Y | N | N | NA | NA | Y | Fair |
| Pepin 2018        | Y | Y | Y  | Y | N | N  | N | Y | Y | N | N | NA | NA | Y | Fair |
| Perlus 2018       | Y | Y | Y  | Y | N | N  | Y | Y | Y | N | N | NA | Y  | Y | Good |
| Plancoulaine 2018 | Y | Y | Y  | Y | N | Y  | Y | Y | Y | N | N | NA | N  | Y | Good |
| Schlieber 2018    | Y | Y | Y  | Y | N | N  | N | N | Y | N | N | NA | NA | Y | Fair |
| Thichumpa 2018    | Y | Y | NR | Y | Y | N  | N | Y | Y | N | N | NA | NA | Y | Fair |

|                |   |   |    |   |   |    |   |   |   |   |   |    |    |   |      |
|----------------|---|---|----|---|---|----|---|---|---|---|---|----|----|---|------|
| Vermeiren 2018 | Y | Y | Y  | Y | N | N  | N | Y | Y | N | N | NA | NA | Y | Fair |
| Wu 2018        | Y | Y | Y  | Y | N | N  | N | Y | Y | N | N | NA | NA | Y | Fair |
| Yang 2018      | Y | Y | Y  | Y | N | N  | N | Y | Y | N | N | NA | NA | N | Fair |
| Zheng 2018a    | Y | Y | Y  | Y | N | N  | N | Y | Y | N | N | NA | NA | Y | Fair |
| Zheng 2018b    | Y | Y | Y  | Y | N | N  | N | Y | Y | N | N | NA | NA | Y | Fair |
| Akay 2019      | Y | Y | NR | Y | N | N  | N | Y | Y | N | N | NA | NA | N | Poor |
| Åkerstedt 2019 | Y | Y | Y  | Y | N | N  | Y | Y | Y | N | N | NA | N  | Y | Fair |
| Al-Hazzaa 2019 | Y | Y | Y  | Y | Y | N  | N | Y | Y | N | N | NA | NA | Y | Good |
| Althakafi 2019 | Y | Y | NA | Y | Y | N  | N | Y | Y | N | N | NA | NA | Y | Fair |
| Barros 2019    | Y | Y | Y  | Y | Y | N  | N | Y | Y | N | N | NA | NA | Y | Good |
| Bazargan 2019  | Y | Y | NR | Y | N | N  | N | N | Y | N | N | NA | NA | Y | Poor |
| Carneiro 2019  | Y | Y | Y  | Y | N | N  | N | N | Y | N | N | NA | NA | Y | Fair |
| Chami 2019     | Y | Y | NR | Y | N | N  | N | N | Y | N | Y | NA | NA | Y | Fair |
| Chen 2019      | Y | Y | Y  | Y | N | Y  | Y | Y | Y | Y | N | NA | NA | Y | Good |
| Doane 2019     | Y | Y | NR | Y | N | CD | N | Y | Y | Y | Y | Y  | NA | Y | Good |
| Gordon 2019    | Y | Y | N  | Y | N | N  | N | Y | Y | N | N | NA | NA | Y | Fair |
| Hartescu 2019  | Y | Y | NA | Y | N | N  | N | Y | Y | N | Y | NA | NA | Y | Fair |
| Kobel 2019     | Y | Y | Y  | Y | N | N  | N | N | Y | N | Y | Y  | NA | Y | Fair |
| Laganière 2019 | Y | Y | NR | Y | N | Y  | Y | N | Y | N | N | NA | N  | Y | Fair |
| Lee ES 2019    | Y | Y | NR | Y | N | N  | N | Y | Y | Y | N | NA | NA | Y | Fair |
| Lee EY 2019    | Y | Y | NR | Y | N | N  | N | Y | Y | N | N | NA | NA | Y | Fair |
| Lei 2019       | Y | Y | NR | Y | N | N  | N | Y | Y | N | N | NA | NA | Y | Fair |
| Maeda 2019     | Y | Y | Y  | Y | N | N  | N | Y | Y | N | N | NA | NA | Y | Fair |
| Manyanga 2019  | Y | Y | NR | Y | N | N  | N | N | Y | N | Y | Y  | NA | Y | Fair |
| Matenchuk 2019 | Y | Y | NR | Y | N | N  | N | N | Y | N | N | NA | NA | Y | Poor |
| Miner 2019     | Y | Y | Y  | Y | N | N  | N | N | Y | N | N | NA | NA | Y | Fair |
| Muller 2019    | Y | Y | NA | Y | Y | N  | N | Y | Y | N | N | NA | NA | Y | Fair |
| Nagata 2019    | Y | Y | Y  | Y | N | N  | N | N | N | N | N | NA | NA | Y | Poor |
| Nasim 2019     | Y | Y | N  | Y | N | N  | N | Y | N | N | N | NA | NA | Y | Poor |
| Peltzer 2019   | Y | Y | Y  | Y | N | N  | N | Y | Y | N | N | NA | NA | Y | Fair |
| Petrovic 2019  | Y | Y | Y  | Y | N | N  | N | N | Y | N | Y | NR | NA | N | Poor |



|                    |   |   |    |   |   |    |   |   |   |   |   |    |    |   |      |
|--------------------|---|---|----|---|---|----|---|---|---|---|---|----|----|---|------|
| Pontes 2019        | Y | Y | Y  | Y | Y | N  | N | N | Y | N | Y | NA | NA | Y | Good |
| Poulain 2019       | Y | Y | NA | Y | N | N  | N | N | Y | N | N | NA | NA | Y | Poor |
| Redondo-Bravo 2019 | Y | Y | Y  | Y | N | N  | N | N | Y | N | Y | NR | NA | Y | Fair |
| Ren 2019           | Y | Y | Y  | Y | N | N  | N | Y | Y | N | N | NA | NA | Y | Fair |
| Sheehan 2019       | Y | Y | Y  | Y | N | N  | N | Y | Y | N | N | NA | NA | Y | Fair |
| Singh 2019         | Y | Y | Y  | Y | N | N  | N | N | Y | N | Y | Y  | NA | Y | Fair |
| Sun 2019           | Y | Y | Y  | Y | N | N  | N | Y | Y | N | N | NA | NA | N | Fair |
| Talvitie 2019      | Y | Y | Y  | Y | N | CD | N | N | Y | N | N | NA | NA | Y | Fair |
| Teo 2019           | Y | N | NA | Y | N | N  | N | Y | Y | N | Y | Y  | NA | Y | Fair |
| Vézina-Im 2019     | Y | Y | Y  | Y | N | N  | N | Y | Y | N | N | NA | NA | Y | Fair |
| Wang 2019          | Y | Y | Y  | Y | N | N  | N | Y | Y | N | N | NA | NA | Y | Fair |
| Wendt 2019         | Y | Y | Y  | Y | N | N  | N | Y | Y | N | N | NA | NA | Y | Fair |
| Williamson 2019    | Y | Y | Y  | Y | N | Y  | Y | N | Y | N | N | NA | N  | Y | Fair |
| Yao 2019           | Y | Y | Y  | Y | N | N  | N | Y | Y | N | N | NA | NA | Y | Fair |
| Zhu 2019           | Y | Y | N  | Y | N | N  | N | Y | N | N | Y | Y  | NA | Y | Fair |
| Chami 2020         | Y | Y | NR | Y | N | N  | N | Y | Y | N | N | NA | NA | Y | Fair |
| Harding 2020       | Y | Y | NA | Y | Y | N  | N | Y | Y | N | N | NA | NA | N | Fair |
| Holstein 2020      | Y | Y | Y  | Y | N | N  | N | Y | Y | N | N | NA | NA | Y | Fair |
| Li 2020            | Y | Y | Y  | Y | N | N  | N | Y | Y | N | N | NA | NA | Y | Fair |
| Metse 2020         | Y | Y | N  | Y | N | N  | N | N | Y | N | N | NA | NA | N | Poor |
| Seaton 2020        | Y | Y | NR | Y | N | N  | N | N | Y | N | N | NA | NA | Y | Poor |
| Sundbom 2020       | Y | N | NR | Y | N | N  | N | Y | Y | N | N | NA | NA | Y | Poor |
| Tomaso 2020        | Y | N | Y  | Y | N | N  | N | N | Y | N | N | NA | NA | Y | Poor |
| Troxel 2020        | Y | Y | Y  | Y | N | N  | N | Y | Y | N | Y | Y  | NA | Y | Good |
| van de Straat 2020 | Y | Y | Y  | Y | N | N  | N | Y | Y | Y | N | NA | Y  | Y | Good |
| Visvalingam 2020   | Y | Y | NA | Y | Y | N  | N | Y | Y | N | N | NA | NA | Y | Fair |
| Wendt 2020         | Y | Y | Y  | Y | N | N  | N | Y | Y | N | Y | Y  | NA | Y | Good |
| Wu 2020            | Y | N | NR | Y | N | N  | N | Y | Y | N | N | NA | NA | Y | Poor |
| Sarveswaran 2021   | Y | Y | Y  | Y | Y | N  | N | Y | Y | N | N | NA | NA | Y | Good |
| Zvolensky 2021     | Y | Y | NR | Y | N | N  | N | N | N | N | N | NA | NA | Y | Poor |

Y = Yes, N = No, CD = cannot determine, NA = not applicable, NR = not reported.

- Q1. Was the research question or objective in this paper clearly stated?
- Q2. Was the study population clearly specified and defined?
- Q3. Was the participation rate of eligible persons at least 50%?
- Q4. Were all the subjects selected or recruited from the same or similar populations (including the same time period)? Were inclusion and exclusion criteria for being in the study prespecified and applied uniformly to all participants?
- Q5. Was a sample size justification, power description, or variance and effect estimates provided?
- Q6. For the analyses in this paper, were the exposure(s) of interest measured prior to the outcome(s) being measured?
- Q7. Was the timeframe sufficient so that one could reasonably expect to see an association between exposure and outcome if it existed?
- Q8. For exposures that can vary in amount or level, did the study examine different levels of the exposure as related to the outcome (e.g., categories of exposure, or exposure measured as continuous variable)?
- Q9. Were the exposure measures (independent variables) clearly defined, valid, reliable, and implemented consistently across all study participants?
- Q10. Was the exposure(s) assessed more than once over time?
- Q11. Were the outcome measures (dependent variables) clearly defined, valid, reliable, and implemented consistently across all study participants?
- Q12. Were the outcome assessors blinded to the exposure status of participants?
- Q13. Was loss to follow-up after baseline 20% or less?
- Q14. Were key potential confounding variables measured and adjusted statistically for their impact on the relationship between exposure(s) and outcome(s)?
